# Supplementary material for: Nurse staffing and patient-perceived quality of nursing care: a cross-sectional analysis of survey and administrative data in German hospitals
Source: PubMed Central journal article supplement — BMJ Open. 2021 Nov 9;11(11):e051133. doi: 10.1136/bmjopen-2021-051133 (PMC8578983; doi:10.1136/bmjopen-2021-051133), 2021-11-09
Supplement: bmjopen-2021-051133.draft_revisions.pdf [file bmjopen-2021-051133.draft_revisions.pdf]

# BMJ Open

BMJ Open is committed to open peer review. As part of this commitment we make the peer review history of every article we publish publicly available.

When an article is published we post the peer reviewers' comments and the authors' responses online. We also post the versions of the paper that were used during peer review. These are the versions that the peer review comments apply to.

The versions of the paper that follow are the versions that were submitted during the peer review process. They are not the versions of record or the final published versions. They should not be cited or distributed as the published version of this manuscript.

BMJ Open is an open access journal and the full, final, typeset and author-corrected version of record of the manuscript is available on our site with no access controls, subscription charges or pay-per-view fees (<http://bmjopen.bmj.com>).

If you have any questions on BMJ Open's open peer review process please email [info.bmjopen@bmj.com](mailto:info.bmjopen@bmj.com)

# BMJ Open

## Nurse staffing and patient-perceived quality of nursing care: A cross-sectional analysis of survey and administrative data in German hospitals

|                               |                                                                                                                                                                                                                                                                           |
|-------------------------------|---------------------------------------------------------------------------------------------------------------------------------------------------------------------------------------------------------------------------------------------------------------------------|
| Journal:                      | <i>BMJ Open</i>                                                                                                                                                                                                                                                           |
| Manuscript ID                 | bmjopen-2021-051133                                                                                                                                                                                                                                                       |
| Article Type:                 | Original research                                                                                                                                                                                                                                                         |
| Date Submitted by the Author: | 11-Mar-2021                                                                                                                                                                                                                                                               |
| Complete List of Authors:     | Winter, Vera; University of Wuppertal; University of Hamburg<br>Dietermann, Karina; University of Hamburg, Hamburg Center for Health Economics<br>Schneider, Udo; Techniker Krankenkasse<br>Schreyoegg, Jonas; University of Hamburg, Hamburg Center for Health Economics |
| Keywords:                     | Human resource management < HEALTH SERVICES ADMINISTRATION & MANAGEMENT, Quality in health care < HEALTH SERVICES ADMINISTRATION & MANAGEMENT, Health & safety < HEALTH SERVICES ADMINISTRATION & MANAGEMENT                                                              |
|                               |                                                                                                                                                                                                                                                                           |

SCHOLARONE™  
Manuscripts

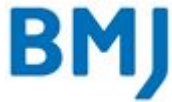

I, the Submitting Author has the right to grant and does grant on behalf of all authors of the Work (as defined in the below author licence), an exclusive licence and/or a non-exclusive licence for contributions from authors who are: i) UK Crown employees; ii) where BMJ has agreed a CC-BY licence shall apply, and/or iii) in accordance with the terms applicable for US Federal Government officers or employees acting as part of their official duties; on a worldwide, perpetual, irrevocable, royalty-free basis to BMJ Publishing Group Ltd ("BMJ") its licensees and where the relevant Journal is co-owned by BMJ to the co-owners of the Journal, to publish the Work in this journal and any other BMJ products and to exploit all rights, as set out in our [licence](#).

The Submitting Author accepts and understands that any supply made under these terms is made by BMJ to the Submitting Author unless you are acting as an employee on behalf of your employer or a postgraduate student of an affiliated institution which is paying any applicable article publishing charge ("APC") for Open Access articles. Where the Submitting Author wishes to make the Work available on an Open Access basis (and intends to pay the relevant APC), the terms of reuse of such Open Access shall be governed by a Creative Commons licence – details of these licences and which [Creative Commons](#) licence will apply to this Work are set out in our licence referred to above.

Other than as permitted in any relevant BMJ Author's Self Archiving Policies, I confirm this Work has not been accepted for publication elsewhere, is not being considered for publication elsewhere and does not duplicate material already published. I confirm all authors consent to publication of this Work and authorise the granting of this licence.

1  
2  
3 **Nurse staffing and patient-perceived quality of nursing care: A cross-sectional analysis of survey and**  
4 **administrative data in German hospitals**  
5  
6  
7

8 Vera Winter<sup>a,b</sup>, Karina Dietermann<sup>b</sup>, Udo Schneider<sup>c</sup>, Jonas Schreyögg<sup>b</sup>  
9

10  
11 Author affiliations:  
12

13 <sup>a</sup> Schumpeter School of Business and Economics, University of Wuppertal, Rainer-Gruenter-Str. 21,  
14 42119 Wuppertal, Germany, winter@wiwi.uni-wuppertal.de. *Corresponding author*  
15

16 <sup>b</sup> Hamburg Center for Health Economics, University of Hamburg, Hamburg, Germany  
17

18 <sup>c</sup> Techniker Krankenkasse, Hamburg, Germany  
19  
20  
21  
22  
23  
24

25 **Word count of the manuscript:** 4.900  
26  
27  
28  
29  
30  
31  
32  
33  
34  
35  
36  
37  
38  
39  
40  
41  
42  
43  
44  
45  
46  
47  
48  
49  
50  
51  
52  
53  
54  
55  
56  
57  
58  
59  
60

## Abstract

**Objective:** To examine the impact of nurse staffing on patient-perceived quality of nursing care. We differentiate nurse staffing levels and nursing skill mix as two facets of nurse staffing and use a multi-dimensional instrument for patient-perceived quality of nursing care. We investigate non-linear and interaction effects.

**Setting:** The study setting was 3,458 hospital units in 1,017 hospitals in Germany.

**Participants:** We contacted 212,554 patients discharged from non-pediatric, non-intensive, and non-psychiatric hospital units who stayed at least two nights in the hospital between January and October 2019. Of those, 30,174 responded, yielding a response rate of 14.2%. Our sample included only those patients. After excluding extreme values for our nurse staffing variables and removing observations with missing values, our final sample comprised 28,136 patients ranging from 18 to 97 years of age (average: 61.12 years) who had been discharged from 3,458 distinct hospital units in 1,017 hospitals.

**Primary and secondary outcome measures:** Patient-perceived quality of nursing care (general nursing care, guidance provided by nurses, and patient loyalty to the hospital)

**Results:** For all three dimensions of patient-perceived quality of nursing care, we found that they significantly decreased as (a) nurse staffing levels decreased (with decreasing marginal effects) and (b) the proportion of assistant nurses in a hospital unit increased. The association between nurse staffing levels and quality of nursing care was more pronounced among patients who were less clinically complex, were admitted to smaller hospitals, or were admitted to medical units.

**Conclusions:** Our results indicate that, in addition to nurse staffing levels, nursing skill mix is crucial for providing the best possible quality of nursing care from the patient perspective and both should be considered when designing policies such as minimum staffing regulations to improve the quality of nursing care in hospitals.

## Article summary

### Strengths and limitations of this study

- This study combines administrative data on hospital unit level nurse staffing with a multi-dimensional survey instrument that covers three aspects of patient-perceived quality of nursing care in a sample of 28,136 patients discharged from 3,458 hospital units in Germany in 2019
- This study demonstrates that the effect of nurse staffing on patient-perceived quality of care is non-linear and depending on patient and hospital characteristics (patient case severity, hospital size, and medical versus surgical patients)
- Besides patient-to-nurse ratios, the study also adds insight on the effect of skill mix and patient-to-physician ratios on patient-perceived quality of nursing care
- The study is cross-sectional and cannot account for all potential endogeneity problems / Even though considering the hospital unit type level is advantageous to using hospital-level aggregated data, omitted variables on hospital unit and patient level might remain.

### Keywords (MeSH Terms)

Nursing Staff, Hospital; Health Workforce; Nurse-Patient Relations; Nursing Care; Patient-Centered Care; Health Care Surveys

## INTRODUCTION AND BACKGROUND

Nurses are responsible for delivering the highest proportion of care to patients in hospitals and therefore a main contributor to quality of hospital care. Nurses who work on units with inadequate staffing are probably not working as effective and efficient as nurses on better-staffed and better-skilled units. As a result, nurses do not have enough time for providing care and instructions, observe vital signs timely, and to respond to patients' individual needs., which leads to missed care and ultimately unfavourable clinical patient outcomes and bad patient experiences and perceptions of quality of care. A large body of empirical studies, including several literature reviews and meta-analyses, has examined how nurse staffing levels affect patient outcomes.[1–10] Most studies have thereby relied on clinical outcomes available in administrative data and e.g. found significant effects of nurse staffing on mortality, pressure ulcers, and pneumonia.[3] Several studies depict that the effect of inadequate nurse staffing on adverse events is through missed care.[11–13] In light of calls for care (and, indeed, research) to be more patient oriented and for health systems to become more responsive to patient needs and expectations,[14–16] the number of studies examining links between nurse staffing patterns and patient experiences of care – i.e., perceived quality of care – has steadily grown.[15–17] In addition, in the wake of many studies on the effects of skill mix on clinical outcomes,[see 3] recent studies investigated the association between skill mix and patient-perceived quality of care.[15, 18, 19]

Several empirical studies that have analyzed the relationship between nurse staffing levels and perceived quality of care have considered the nurse's rather than the patient's perspective.[19–22] While the former is of course crucial, there is evidence that nurses' perceptions of the quality of their work can deviate substantially from the patients' perceptions[23]. In addition, most studies that have analyzed quality of care as an outcome have used measures that are very general (e.g., single items to rate overall quality of care or patient safety).[17, 22, 24, 25] Outcome measures like these are less informative about the quality of care provided by nurses and therefore potentially less sensitive to nurse staffing. Some studies have used multi-dimensional constructs of patient satisfaction or patient experience with care. Yet, these constructs usually comprise dimensions and indicators that do not relate to nursing care, but other aspects, such as responsiveness of hospital staff, discharge information, and overall hospital rating, all of which are also indicators of other health professionals' quality of care.[11, 16, 20, 26] . Only a handful of studies have used items that ask directly about the quality of care provided by nurses, or quality of nursing care.[20–22] To our knowledge, no studies to date have used a validated, multi-item, and multi-dimensional scale for patient-perceived quality of nursing care.

1  
2  
3 Methodologically, examining the link between nurse staffing and patient outcomes is at risk of  
4 endogeneity problems, such as omitted variable bias (e.g., skill mix, hospital-unit-type and patient  
5 characteristics, or physician staffing could all be related to nurse staffing and patient outcomes) or  
6 endogenous sorting (whereby hospitals devote more resources to patients with a higher risk of adverse  
7 outcomes).[1, 4, 8, 16, 27] The risk of endogeneity increases with the level of aggregation; as many  
8 studies use staffing information at the aggregated hospital level,[6, 17, 20, 21, 28, 29] they do not  
9 consider important information at the level of hospital units [7, 30, 31] or of patients.[16, 32] At the  
10 other extreme, using micro level data on the patient level [as e.g., 32, 33] usually implies substantial  
11 primary data collection efforts and a focus on one or few organizations, hence limiting generalizability.  
12 As an in-between approach, the number of studies using data at the level of hospital units has grown,[7,  
13 31, 34–39] yet often suffers from limited sample sizes both in terms of patients and hospitals.[15] In  
14 addition, recent evidence hints to the fact the effect of nurse staffing on quality of nursing care non-  
15 linear, i.e., the effect of an additional nurse per patient might be high if nurse staffing is low; with higher  
16 numbers of nurses, the effect of each additional nurse probably decreases.[15] Furthermore, recent  
17 studies indicate that the association between nurse staffing and patient outcomes can differ depending  
18 on patients' case severity,[8, 40] hospital size,[6, 41], and between medical versus surgical units.[8, 28]  
19 Yet most of these studies have analyzed the associations between nurse staffing and clinical patient  
20 outcomes.  
21  
22  
23  
24  
25  
26  
27  
28  
29  
30  
31  
32  
33

34 The present study aims to shed further light on the association between nurse staffing and patient-  
35 perceived quality of nursing care. In particular, we examine this relationship between nurse staffing  
36 levels, nurse skill mix, and patient-perceived quality of nursing care based on large-scale survey data  
37 combined with administrative data. Especially the use of a multi-dimensional survey instrument  
38 reflecting the patient perspective on nursing quality for measuring this relationship is quite novel.  
39 Second, we addressed substantial parts of potential endogeneity by including a rich set of patient- and  
40 hospital-related control variables. Thereby, we specifically consider physician staffing and investigate to  
41 which degree physician staffing is a relevant predictor of patient-perceived quality of nursing care. In  
42 addition, we apply a fixed effects model to account for differences across hospital unit types, which  
43 seems important to reduce endogeneity problems. Finally, we allow for non-linear effects of nurse  
44 staffing on quality of nursing care and conduct sub-group analyses on patient case severity, hospital size,  
45 and medical versus surgical hospital units.  
46  
47  
48  
49  
50  
51  
52  
53  
54  
55  
56  
57  
58  
59  
60



## METHODS

### Data and sample

This study is part of a larger project on the association between nurse staffing and quality of care.[3, 42, 43] Our study analyzed data from an online patient survey, which we combined with (a) claims data provided by the largest statutory health insurance fund in Germany and (b) data from the mandatory quality reports published annually by each hospital in the country. The combined data set comprised data from patients discharged from non-pediatric, non-intensive, and non-psychiatric hospital units between January and October 2019. We define a hospital unit as an operating unit within a hospital that focuses on specific types of patients (e.g., geriatrics or cardiology). Our sample included only those patients who stayed at least two nights in the hospital. We contacted patients in monthly waves and asked them to participate in the survey, eight weeks after they had been discharged from the hospital at the latest. The survey contained questions related to patients' perceptions of the quality of the nursing care provided during their hospital stay. Each patient was contacted only once. In total, we contacted 212,554 patients, of whom 30,174 responded, yielding a response rate of 14.2%. The sample is representative for the population of adult hospitalized patients in Germany, except for the age group 80 and above, who are slightly underrepresented.

The claims data in our data set contained patient-level information about the course of disease during each patient's hospital stay, as well as the dates of hospital admission and discharge, the type of hospital unit, and ICD codes. The quality reports contained general information at the hospital unit level, such as the number of patient cases treated and staffing numbers that relate to the situation at the end of 2017.

### Nurse staffing

We obtained the nurse staffing level in each hospital unit by calculating a patient-to-nurse ratio (PTN) in line with the definition for measuring nursing workload as suggested by the National Office of Statistics in Germany.[44] The patient-to-nurse ratio indicates how many patients a nurse has to care for during an average shift and is given by:

$$PTN = \frac{\text{occupation days} * 24\text{hours}}{\text{nurses} * 220\text{days} * 8\text{hours}}, \text{ with}$$

$$\text{occupation days} = \text{inpatient} * \text{average length of stay}.$$

The total number of nurses (based on full-time nurses employed) comprise all registered nurses with at least three years of training and assistant nurses with at least one year of training. The numbers are

1  
2  
3 derived from the annual quality reports of each hospital, representing the situation at the end of the  
4 year and not accounting for sickness absences or other sources of within-year variations such as  
5 variation caused by holidays. To calculate occupation days, we used the number of inpatients and  
6 approximated the average length of stay or each hospital unit based on the average length of stay of  
7 more than 6.2 million inpatient cases available in our claims data set over the period 2014 to 2019. We  
8 draw on the five-year period for this approximation because we cannot observe all patients in each  
9 hospital unit in one year; to ensure robustness, we considered only those hospital units with more than  
10 150 observations to approximate the length of stay.  
11  
12

13  
14  
15  
16  
17 In addition to staffing levels, we accounted for the skill mix in each hospital unit by calculating the ratio  
18 of assistant nurses to the total number of nurses (measured in full-time equivalents):  
19

$$20 \text{ skill mix} = \frac{\text{assistant nurses}}{\text{nurses}}.$$

21  
22  
23 We excluded extreme values, i.e., patient-to-nurse ratios below 1 and above 20, as well as skill-mix ratios  
24 above 25%.  
25  
26  
27

## 28 29 **Quality of nursing care**

30  
31 Because the definition of nursing care varies from country to country, it is necessary to use an  
32 instrument that takes country-specific regulations into account. We therefore chose the Patients'  
33 Experience of Nursing Quality in Acute Hospitals (PENQuAH) instrument developed by Blume to analyze  
34 the relationship between nurse staffing and patient outcomes.[43] The instrument was designed to  
35 evaluate patients' perceptions of quality of nursing care in German hospitals. The instrument consists of  
36 24 items, which were chosen based on a review of the literature and interviews with nursing experts. To  
37 examine the scale's dimensionality and factor-based validity, Blume conducted exploratory and  
38 confirmatory factor analyses with a randomly split sample.[43] Their exploratory factor analysis revealed  
39 that three main dimensions captured the structure of the underlying item set: general nursing care,  
40 guidance provided by nurses, and nurse-related patient loyalty to the hospital. The results of their  
41 confirmatory factor analysis suggested a good overall model fit (CFI = 0.978; TLI = 0.976). Table 1 shows  
42 the three dimensions and exemplary related items.  
43  
44  
45  
46  
47  
48  
49  
50  
51  
52  
53

54 --- include table 1 about here ----  
55  
56  
57  
58  
59  
60

We calculated each dimension of quality of nursing care by taking the arithmetic mean of the underlying items after recoding reverse-coded items. Dimensions one and two are on a scale of one to five, with five representing the best quality of nursing care, and dimension three is on a scale of one to four, with four representing the best quality of nursing care. Dimension one represents patients' perception of the general quality of nursing care. Dimension two represents patients' perception of the guidance provided by nurses. Dimension three comprises two items that capture patients' loyalty to a hospital based on the nursing care provided.

### Statistical model

The results of previous studies suggest that the relationship between nurse staffing and patient outcomes varies across different types of hospital units.[8, 35, 42] To account more accurately for potential differences across the 24 unit types in our sample and to depict potential heteroscedastic structures in the error term of the regression, we applied a fixed effects model. The model is given by:

$$QoNC_{iu}^{(x)} = \alpha_0 + \alpha_{10} \widetilde{PTN}_{iu} + \alpha_{11} \widetilde{PTN}_{iu}^2 + \alpha_2 \widetilde{skill}_{iu} + \beta_1 \overline{PTN}_u + \beta_2 \overline{skill}_u + \gamma C_{iu} + (v_{0u} + \varepsilon_{iu}),$$

where  $QoNC_{iu}^{(x)}$  is the value of one of the three factors  $x \in \{1, 2, 3\}$  for patient  $i$  admitted to unit type  $u$ ,  $u \in \{1, \dots, 24\}$ .  $\alpha_0$  is the intercept of the regression.  $\widetilde{PTN}_{iu} = (PTN_{iu} - \overline{PTN}_u)$  and  $\widetilde{skill}_{iu} = (skill_{iu} - \overline{skill}_u)$  with coefficients  $\alpha_{10}$  and  $\alpha_0$  are the mean-centered independent nurse staffing variables of interest, which correspond to the patient-to-nurse and skill mix ratio of the hospital unit associated with patient  $i$  minus the group means  $\overline{PTN}_u$  and  $\overline{skill}_u$  for each unit type  $u$ . Assuming that the marginal effect of the patient-to-nurse ratio on quality of nursing care decreases as staffing levels increase, we also included a squared patient-to-nurse term with coefficient  $\alpha_{11}$ .  $\beta_1$  and  $\beta_2$  are the coefficients of the between-unit effects.  $C_{iu}$  represents a vector of patient-, hospital-, and hospital-unit-related control variables at level one of the model. First, it includes the patient-to-physician (PTP) ratio, because it might correlate with the PTN ratio and also affect the outcome.[e.g., 27] Second, we account for in patient risks by including age, gender, and each patient's case severity reflected by the Patient Clinical Complexity Level (PCCL) index (0-6), which indicates the degree of comorbidities and complications for each patient. It is derived from a closed list of comorbidities and complications and is meant to predict a patient's need for hospital resources, such as nursing care.[45] We directly incorporate the PCCL index in our model because sensitivity analyses using dummy variables for each score suggested a linear relationship. Furthermore, we control for the rurality of each patient's place of residence using an index

1  
2  
3 ranging from one (urban area) to four (rural area), hospital size categories, and monthly fixed effects.  $\nu_{0u}$   
4 refers to the fixed effects for the 24 hospital unit types.  
5

6  
7 As most previous studies used dichotomized outcome variables, we transformed our three quality of  
8 nursing care measures into dichotomous outcome variables and estimated a generalized version of our  
9 fixed effects model using a logit link function for comparability purposes, i.e. a logit model. To check the  
10 robustness of our main model, we replaced the Patient Clinical Complexity Level index with the  
11 Elixhauser comorbidity categories.[46]  
12  
13

14  
15  
16 Moreover, we conducted subgroup analyses. As suggested by previous studies, the association between  
17 nurse staffing and patient outcomes can differ depending on patients' case severity.[8, 40] To study  
18 these potential differences, we split our sample into patients with low case severity (Patient Clinical  
19 Complexity Level = 0) and those with high case severity (Patient Clinical Complexity Level > 0) and  
20 estimated our main regression model for each of the sub-samples. Additionally, we considered that our  
21 results might vary due to differences in hospital size.[6, 41] We therefore split our sample into two  
22 categories – i.e., patients admitted to hospitals with fewer than 500 beds (category “small”) and patients  
23 admitted to hospitals with at least 500 beds (category “large”). Lastly, by categorizing our unit types as  
24 medical or surgical, we estimated our statistical model separately for medical and surgical patients.  
25  
26  
27  
28  
29  
30

## 31 32 Patient and Public Involvement

33  
34 This study is part of a larger project on the association between nurse staffing and quality of care.[3, 42,  
35 43] The public, i.e., a statutory health insurance, hospital managers, and patient representatives were  
36 involved in the design of the overall project. In addition, patients, practitioners (nurses, physiotherapists,  
37 doctors), and scientific experts were involved in the development of the survey (described in more detail  
38 in [3, 43]). Results of the study and the overall project will be disseminated to the participants via the  
39 statutory health insurance and via additional practice-oriented publications and newsletters.  
40  
41  
42  
43  
44

## 45 RESULTS

### 46 Descriptive results

47  
48 After excluding extreme values for our nurse staffing variables and removing observations with missing  
49 values for one or more of the control variables, our final sample comprised 28,136 patients ranging from  
50 18 to 97 years of age (average: 61.12 years) who had been discharged from 3,458 distinct hospital units  
51 in 1,017 hospitals. 39.2% of the survey participants were female. Table 2 illustrates the distribution of  
52 patients and the average response for each of the three dimensions of quality of nursing care across the  
53  
54  
55  
56  
57  
58

1  
2  
3 24 types of hospital units. Overall, the variation in the distribution of patients across the 24 unit types  
4 was large. Almost 50% of the patients had been discharged from general surgery or internal medicine,  
5 followed by orthopedics, urology, neurology, trauma surgery, and cardiology, from each of which  
6 between six and ten percent of the patients had been discharged. All of the other unit types each  
7 accounted for less than three percent of the patients in our sample. In terms of our dependent variable,  
8 quality of nursing care, we obtained an average response of 4.33, 3.77, and 3.38 for the three  
9 dimensions general nursing care, guidance provided by nurses, and nurse-related patient loyalty to the  
10 hospital, respectively, indicating that the perceived quality of nursing care was above the scale average  
11 for each. In addition, we found that patient perception of the guidance provided by nurses was, on  
12 average, 0.56 scale points lower compared to the general perception of quality of nursing care. We also  
13 found that the average responses varied across hospital unit types. For instance, for dimensions one and  
14 two, the average responses for patients discharged from internal medicine were 0.24 and 0.46 scale  
15 points higher, respectively, compared to orthopedic patients.

16  
17 For the patient-to-nurse and skill-mix-ratios, we obtained average values of 5.84 patients per nurse and  
18 6.61%, respectively. The patient-to-nurse ratio ranged from 3.77 patients a nurse has to care for in heart  
19 surgery to 9.75 in rheumatology. The skill-mix ratio ranged from 3.33% assistant nurses in nuclear  
20 medicine to 13.59% assistant nurses in endocrinology (see table A.1).

21  
22  
23  
24  
25  
26  
27  
28  
29  
30  
31  
32  
33  
34  
35 ---- include table 2 about here ----  
36  
37  
38

### 39 Regression results

40  
41 As shown in Table 3, our results indicate that the two nurse staffing variables were significantly related  
42 to quality of nursing care. An increase in the patient-to-nurse ratio significantly decreased the general  
43 quality of nursing care, the patient perception of nursing guidance, and nurse-related patient loyalty to a  
44 given hospital. Additionally, there were significantly positive associations between the squared patient-  
45 to-nurse ratio, on the one hand, and the general quality of nursing care, guidance, and patient loyalty, on  
46 the other. Hence, the negative effect of the patient-to-nurse ratio is greater when the patient-to-nurse  
47 ratio is smaller (in other words, if a nurse already has to care for a lot of patients, one additional patient  
48 has a less strong effect on quality perceptions). With regard to the skill-mix ratio, we found that an  
49 increase in the ratio of assistant nurses to the total number of nurses led to a significant decrease in  
50 general quality of nursing care, patient perception of nursing guidance, and patient loyalty. An increase  
51  
52  
53  
54  
55  
56  
57  
58  
59  
60

1  
2  
3 in the patient-to-physician ratio of one additional patient a physician must care for significantly  
4 decreased the quality of nursing care dimensions.  
5  
6  
7  
8

9 ---- include table 3 about here ----  
10  
11  
12  
13

14 The adjusted  $R^2$  measure indicated that our model reduces the error in predicting an individual outcome  
15 for our three dimensions of quality of nursing care by between 4.5 and 6.1%.  
16  
17

18 The regression results of the logit model indicated that an additional patient per nurse decreases the  
19 odds of a patient reporting high quality of nursing care. For nurse-related patient loyalty, this effect is  
20 significantly non-linear in the same way as in our main model (stated above). Increasing the share of  
21 assistant nurses decreases the odds of reporting high quality. An additional patient per physician does  
22 not significantly decrease the odds of reporting a high quality of quality of nursing care (see table A.2).  
23  
24  
25  
26

27 When we replaced the Patient Clinical Complexity Level index with the Elixhauser risk adjustment, our  
28 results remained robust.  
29  
30

### 31 **Sub group analyses**

32 Differentiating between patients according to their case severity, we found that the mean-centered  
33 patient-to-nurse ratio and its square are significantly associated with all three dimensions of patient-  
34 perceived quality of nursing care for patients with low case severity, but not for those with high case  
35 severity. The effects of the skill-mix ratio are also only significant for patients with low case severity,  
36 while the effects of the patient-to-physician ratio are slightly larger and only significant for high-case  
37 severity patients (except for general nursing care) (see table A.3).  
38  
39  
40  
41  
42  
43

44 When splitting our sample into patients admitted to a hospital with fewer than 500 beds and those  
45 admitted to a hospital with at least 500 beds, we found that an increase in the patient-to-nurse ratio  
46 significantly decreased general nursing care and nurse-related patient loyalty only for patients admitted  
47 to hospitals with fewer than 500 beds. Skill mix significantly affected general nursing care perceptions  
48 and nurse-related patient loyalty in small hospitals only, while it significantly affected the perception of  
49 guidance provided by nurses in small and in large hospitals. Moreover, we found a significant association  
50 between physician staffing and patient-perceived quality of nursing care for patients admitted to larger  
51 hospitals but not for patients admitted to smaller ones (see table A.4).  
52  
53  
54  
55  
56  
57  
58  
59  
60

1  
2  
3 Finally, when we divided patients into those admitted to medical or surgical units, we found that the  
4 patient-to-nurse ratio significantly affected perceptions of guidance by nurses and nurse-related patient  
5 loyalty for medical patients only. The associations between the skill mix ratio and quality of nursing care  
6 seem largely unaffected by the sample split. Finally, it shows that medical patients were more sensitive  
7 to physician staffing compared to surgical patients (see table A.5).  
8  
9  
10

## 11 12 13 DISCUSSION

14  
15 Our results provide important new insights into the relationship between nurse staffing and patient  
16 outcomes, in particular, patient-perceived quality of nursing care. We found that patient-perceived  
17 quality of nursing care significantly decreased as staffing levels, measured using the patient-to-nurse  
18 ratio, decreased. This finding is in line with previous research that has examined the relationship  
19 between nurse staffing levels and general perceived quality of care measures.[15, 16, 19–22, 25, 26, 47–  
20 49] Our study adds to the previously ambiguous evidence in literature by providing insights into the  
21 specific aspects of perceived quality of nursing care that are affected by staffing levels. Evidence on the  
22 perceived quality of guidance provided by nurses has been inconsistent and scarce.[20, 22] Our results,  
23 however, corroborate and extend the findings of Zhu et al. ,[22] who found that higher staffing levels  
24 improved satisfaction with nurses' guidance on medications and medical aids, pain management, and  
25 self-help.[22] With respect to nurse-related patient loyalty, our results confirm the findings of previous  
26 studies that have found that higher nurse staffing levels in hospitals increase the likelihood of patients  
27 generally recommending a hospital to family and friends.[20, 21] Thus, nurse-related patient loyalty  
28 seems to be highly related to overall recommendation behavior. In sum, staffing levels affect whether an  
29 adequate amount of time is devoted to caring and providing instructions as well as nurses'  
30 responsiveness to patients' individual needs. Furthermore, nurse staffing levels have direct  
31 consequences for hospitals in terms of patient loyalty. Yet, those effects are not linear; instead, the  
32 negative effects become smaller with rising numbers of patients per nurse. This decreasing marginal  
33 effect of the patient-to-nurse ratio on quality of nursing care with increasing staffing levels is in line with  
34 prior research [15] and seems reasonable: when the ratio is small, each additional patient will  
35 substantially affect the amount of time and the responsiveness of a nurse, thus probably substantially  
36 reducing missed care.[11–13] In contrast, the effect will be lower when a nurse already needs to care for  
37 a high number of (potentially less complex) patients and each additional patient only has a low impact.  
38  
39  
40  
41  
42  
43  
44  
45  
46  
47  
48  
49  
50  
51  
52

53  
54 Our results suggest that the nurses' level of educational attainment, as measured using the skill-mix  
55 ratio, significantly influences patient-perceived quality of nursing care. This finding adds to the few  
56  
57  
58  
59  
60

1  
2  
3 available studies on the relationship between skill mix and patient-perceived quality of care.[15, 18, 19]  
4 We found strong evidence that a higher proportion of assistant nurses, which means a lower proportion  
5 of professionalization among nursing staff, is negatively associated with all three dimensions of quality of  
6 nursing care. Nurses with lower levels of educational attainment may have less training in interacting  
7 with patients, might work less efficiently and hence have less time per patient, or both. In addition, it is  
8 conceivable that they are less experienced in providing instructions suited to a patient's particular needs  
9 – for example, with regard to medication, pain relief, or the use of medical aids. Any of these factors  
10 could lead to negative perceptions among patients of quality of nursing care and potentially also to an  
11 increased number of adverse events.[8, 17, 50]  
12  
13

14  
15 We found that one additional patient per physician significantly reduced all three dimensions of patient-  
16 perceived quality of nursing care. This is in line with the findings of e.g. West et al.,[51] who found that  
17 both physician and nurse staffing impact intensive care unit patient mortality . However, we found that  
18 the effect sizes for physician staffing were less pronounced compared to those for nurse staffing levels,  
19 indicating that our instrument is more closely related to nurse staffing than to physician staffing. This  
20 result might indicate that patients are not fully capable of differentiating between different occupational  
21 groups when assessing quality of care in hospitals. Another explanation might be that physician staffing  
22 does in fact have an impact on quality of nursing care; if physicians have to care for a large number of  
23 patients, they might omit passing on information which nurses need to adequately care for a patient –  
24 e.g., information on the patients' needs or patient-specific treatment instructions. Additionally, stressed  
25 physicians might cause a bad civility climate, which in turn negatively impacts nurses' civility towards  
26 patients.[52, 53]  
27  
28

29  
30 The significant association we observed between the patient-to-nurse ratio and patient-perceived quality  
31 of nursing care was driven mainly by low-severity patients. This stands in contrast to the study of West et  
32 al.,[51] which found that reductions in mortality risks from having more intensive care unit nurses is  
33 larger for patients who are the most severely ill. This might indicate that the effect of nurse staffing  
34 differs across hospital units (in particular, intensive versus non-intensive care) and/or across outcomes  
35 (in that case, patient-perceived quality of care and mortality). Additionally, for low-severity patients, the  
36 share of assistant nurses affects their perceptions of quality of nursing care, while for high-severity  
37 patients, the patient-to-physician ratio affects their perceptions of quality of nursing care. Because high-  
38 severity patients are more dependent on various health professionals and their collaborative  
39 performance, the quality of cooperation and consistency within and across occupational groups might  
40 explain their perceptions of quality of nursing care rather than staffing levels and skill mix.[53] Low-  
41  
42  
43  
44  
45  
46  
47  
48  
49  
50  
51  
52  
53  
54  
55  
56  
57  
58  
59  
60



1  
2  
3 severity patients might be less relying on different professionals, so that the composition of the nurses,  
4 as expressed in their skill mix, is of greater relevance to them.  
5

6  
7 Similarly, splitting our sample using two separate bed categories reveals that an increase in the patient-  
8 to-nurse ratio decreases patient-perceived quality of nursing care among patients admitted to hospitals  
9 with fewer than 500 beds rather than for patients admitted to hospitals with at least 500 beds. Yet, the  
10 patient-perceived guidance is only significantly affected by staffing levels in large hospitals (significant  
11 non-linear effect). While skill mix significantly affects patient-perceived general nursing care and loyalty  
12 in smaller hospitals only, it significantly relates to guidance in both small and large hospitals. Thus, we  
13 see some variation in how our variables of interest relate to the different quality of nursing care  
14 dimensions. The patient-to-physician ratio in turn only significantly affects patient-perceived quality of  
15 nursing care in large hospitals for all three quality of nursing care dimensions. This might be explained by  
16 a higher proportion of high-severity patients admitted to larger and potentially more highly specialized  
17 hospitals. In addition, in larger hospitals, collaboration across different occupational groups might be of  
18 higher importance than in smaller hospitals.  
19

20  
21 The stronger statistical significance of the relationship between nurse and physician staffing levels and  
22 quality of nursing care for medical patients compared to surgical patients seems plausible, as well. For  
23 nurse staffing, the finding is in line with previous studies that have analyzed the relationship between  
24 nurse staffing levels and patient outcomes based on administrative data and found stronger associations  
25 for medical patients.[8] The difference in effects might be explained by surgical patients being healthier  
26 (i.e., as a precondition for being eligible for surgery) and therefore being less dependent on nurses. For  
27 medical patients, the collaboration between professional groups might also be of higher relevance,  
28 which can explain the significant effects of physician staffing.  
29

30  
31 Although our study makes important contributions to understanding the relationship between nurse  
32 staffing and patient outcomes, it is not without important limitations, each of which offers avenues for  
33 further research. First, both of the nurse staffing variables used in our analysis (i.e., patient-to-nurse and  
34 skill-mix ratios) represent annual averages and do not capture day-to-day variations in nurse staffing.  
35 Similarly, even though we were able to consider several variables which are likely related to nurse  
36 staffing and patient outcomes, we might have omitted variable bias from other hospital-unit-related  
37 characteristics, such as the availability and use of technology, the share of temporary or immigrant  
38 nurses, the team climate, or absences due to sickness. These variables were not available in our data  
39 sample but might be associated with nurses' workload and also have an effect on patient outcomes.[27,  
40  
41  
42  
43  
44  
45  
46  
47  
48  
49  
50  
51  
52  
53  
54  
55  
56  
57  
58  
59  
60

1  
2  
3 53] Thus, although this study overcomes several endogeneity issues of previous studies it cannot claim to  
4 fully address them. While the large size of our sample may compensate for some of these issues, future  
5 studies may want to draw upon or collect more finely grained data covering day-to-day variations in  
6 nurse staffing variables and should try to account for further hospital characteristics. In addition,  
7 administrative staffing measures have been shown to deviate from perceived staffing adequacy;<sup>[54, 55]</sup>  
8 therefore, accounting for the latter in relation with quality of nursing care is a valuable avenue for  
9 further research, too. Another limitation this study shares with previous research is its cross-sectional  
10 nature. As the causal order and the generalizability of our results cannot be verified, future studies  
11 would be valuable to investigate the relationships in other settings and over time. Finally, the PENQuAH  
12 instrument has only been tested in Germany. As it has been able to provide more fine-grained insights  
13 into the dimensions of patient-perceived quality of nursing care, we recommend applying, adapting, and  
14 validating it to further data samples, and adjusting it to the hospital environments of other countries.

15  
16 Our results have important implications for hospital managers and health policy makers pursuing  
17 stronger patient orientation. By providing strong evidence that quality of nursing care is affected by  
18 nurse staffing, we show that nurse staffing decisions are critical for favorable patient care experiences.  
19 We find that in addition to staffing levels, nurses' skill mix is an important factor associated with quality  
20 of nursing care. Therefore, we recommend considering nurses' levels of educational attainment,  
21 qualifications and specializations when designing policies, such as minimum staffing regulations, to  
22 improve nurse staffing in hospitals.  
23  
24  
25  
26  
27  
28  
29  
30  
31  
32  
33  
34  
35  
36  
37  
38  
39  
40  
41  
42  
43  
44  
45  
46  
47  
48  
49  
50  
51  
52  
53  
54  
55  
56  
57  
58  
59  
60

## Tables

|     | Dimension                   | exemplary items                                                                                                                                                                                                                  | scale                |
|-----|-----------------------------|----------------------------------------------------------------------------------------------------------------------------------------------------------------------------------------------------------------------------------|----------------------|
| (1) | general nursing care        | <ul style="list-style-type: none"> <li>From my perspective, I always received the necessary care in the hospital.</li> <li>Nursing staff treated me respectfully and courteously.</li> </ul>                                     | 1 (worst) – 5 (best) |
| (2) | guidance provided by nurses | <ul style="list-style-type: none"> <li>Nursing staff told or showed me how I may and should move.</li> <li>Nursing staff told or showed me how to use my medical aids.</li> </ul>                                                | 1 (worst) – 5 (best) |
| (3) | nurse-related loyalty       | <ul style="list-style-type: none"> <li>Thinking about the nursing staff, would you select the hospital again?</li> <li>Thinking about the nursing staff, would you recommend the hospital to your friends and family?</li> </ul> | 1 (worst) – 4 (best) |

**Table 1: Overview on dimensions of Patients' Experience of Nursing Quality in Acute Hospitals (PENQuAH) instrument**

| unit type         | Patients      | hospital units | (1) general nursing care <sup>1</sup> | (2) guidance <sup>2</sup> | (3) loyalty <sup>3</sup> |
|-------------------|---------------|----------------|---------------------------------------|---------------------------|--------------------------|
| Internal medicine | 6,260         | 732            | 4.22                                  | 3.56                      | 3.25                     |
| Geriatrics        | 106           | 60             | 3.76                                  | 3.34                      | 2.90                     |
| Cardiology        | 1,698         | 150            | 4.34                                  | 3.71                      | 3.37                     |
| Nephrology        | 61            | 21             | 4.19                                  | 3.62                      | 3.27                     |
| Hematology        | 181           | 66             | 4.37                                  | 3.71                      | 3.47                     |
| Endocrinology     | 22            | 5              | 4.29                                  | 3.65                      | 3.27                     |
| Gastroenterology  | 378           | 73             | 4.08                                  | 3.37                      | 3.13                     |
| Pneumology        | 200           | 35             | 4.27                                  | 3.70                      | 3.39                     |
| Rheumatology      | 121           | 14             | 4.34                                  | 3.57                      | 3.38                     |
| Pulmonarymedicine | 77            | 12             | 4.36                                  | 3.74                      | 3.45                     |
| Generalsurgery    | 7,512         | 771            | 4.37                                  | 3.87                      | 3.43                     |
| Traumasurgery     | 1,784         | 234            | 4.26                                  | 3.73                      | 3.28                     |
| Neurosurgery      | 582           | 104            | 4.28                                  | 3.65                      | 3.39                     |
| Vascularsurgery   | 300           | 86             | 4.39                                  | 3.87                      | 3.45                     |
| Plasticsurgery    | 186           | 45             | 4.31                                  | 3.79                      | 3.41                     |
| Thoracicsurgery   | 81            | 22             | 4.47                                  | 4.09                      | 3.56                     |
| Heartsurgery      | 319           | 54             | 4.36                                  | 3.90                      | 3.46                     |
| Urology           | 2,396         | 295            | 4.44                                  | 3.93                      | 3.46                     |
| Orthopedics       | 2,753         | 226            | 4.46                                  | 4.02                      | 3.57                     |
| Neurology         | 1,951         | 275            | 4.28                                  | 3.61                      | 3.30                     |
| Nuclearmedicine   | 103           | 36             | 4.56                                  | 4.20                      | 3.51                     |
| Radiotherapy      | 53            | 23             | 4.49                                  | 4.02                      | 3.45                     |
| Dermatology       | 760           | 63             | 4.40                                  | 3.93                      | 3.43                     |
| Dentistry         | 252           | 56             | 4.12                                  | 3.68                      | 3.18                     |
| <b>Total</b>      | <b>28,136</b> | <b>3,458</b>   | <b>4.33</b>                           | <b>3.77</b>               | <b>3.38</b>              |

**Table 2: Quality of nursing care across unit types**

<sup>1</sup> Mean response for general nursing care, measured on a scale of one to five, with five representing the best care.

<sup>2</sup> Mean response for guidance provided by nurses, measured on a scale of one to five, with five representing the best guidance.

<sup>3</sup> Mean response for patient loyalty to the hospital, measured on a scale of one to four, with four representing the highest loyalty.

| effect <sup>†</sup>         | (1) general nursing care          | (2) guidance                      | (3) loyalty                       |
|-----------------------------|-----------------------------------|-----------------------------------|-----------------------------------|
| $\widetilde{PTN}$           | -0.020 [0.002]<br>(-0.033;-0.008) | -0.023 [0.018]<br>(-0.041;-0.004) | -0.025 [0.000]<br>(-0.038;-0.012) |
| $\widetilde{PTN}^2$         | 0.001 [0.003]<br>(0.000;0.002)    | 0.001 [0.030]<br>(0.000;0.002)    | 0.001 [0.002]<br>(0.000;0.002)    |
| $\widetilde{skill}$         | -0.003 [0.000]<br>(-0.004;-0.001) | -0.005 [0.000]<br>(-0.007;-0.003) | -0.003 [0.000]<br>(-0.005;-0.002) |
| $PCCL$                      | -0.048 [0.000]<br>(-0.057;-0.040) | -0.034 [0.000]<br>(-0.047;-0.022) | -0.028 [0.000]<br>(-0.037;-0.019) |
| $age$                       | 0.021 [0.000]<br>(0.018;0.025)    | 0.018 [0.000]<br>(0.013;0.023)    | 0.018 [0.000]<br>(0.014;0.021)    |
| $age^2$                     | 0.000 [0.000]<br>(0.000;0.000)    | 0.000 [0.000]<br>(0.000;0.000)    | 0.000 [0.000]<br>(0.000;0.000)    |
| $gender$<br>(= 1 if female) | -0.192 [0.000]<br>(-0.210;-0.173) | -0.276 [0.000]<br>(-0.303;-0.249) | -0.140 [0.000]<br>(-0.159;-0.121) |
| $rurality$                  | 0.014 [0.004]<br>(0.004;0.024)    | 0.028 [0.000]<br>(0.014;0.042)    | 0.004 [0.382]<br>(-0.005;0.014)   |
| $\widetilde{PTP}$           | -0.002 [0.030]<br>(-0.003;0.000)  | -0.002 [0.026]<br>(-0.005;0.000)  | -0.002 [0.013]<br>(-0.003;0.000)  |
| adj. R <sup>2</sup>         | <b>0.061</b>                      | <b>0.055</b>                      | <b>0.045</b>                      |
| observations                | <b>28,136</b>                     | <b>28,136</b>                     | <b>28,136</b>                     |

**Table 3: Regression results**

P-values in square brackets, 95%-confidence intervals in parentheses

Abbreviations:  $\widetilde{PTN}$ : mean-centered patient-to-nurse ratio;  $\widetilde{skill}$ : mean-centered skill-mix ratio; PCCL: Patient Clinical Complexity Level index;

$\widetilde{PTP}$ : mean-centered patient-to-physician ratio

†Fixed effects for unit types, months, and bed categories (50—299, 300—499, 500—749, and at least 750) and between-unit effects for patient-to-nurse and skill mix included but not shown.

## Funding

This material is based upon work supported by the Innovation Fund of the German Federal Joint Committee, P.O. Box 12 06 06, Berlin, Germany (01VSF17038).

## Competing/Conflicting interests

The authors declare that they have no competing or conflicting interests.

## Author statement

All authors meet the ICMJE recommended criteria for authorship. They have:

- 1a) made a substantial contribution to the conception and design
- 1b) the acquisition, analysis, or interpretation of the data,
- 2a) Contributed to drafting the article or
- 2b) critical revision for important intellectual content
3. They have given (or undertake to give) final approval of the version to be published.
4. Have agreed to be accountable for all aspects of the work in ensuring that questions related to the accuracy or integrity of any part of the article are appropriately investigated and resolved.

No further writing assistance other than basic copy-editing has been provided.

## Ethical approval and informed consent

A declaration of compliance with terms of use and ethical standards from the University of Hamburg's WiSo Laboratories was obtained on January 15th, 2019 (no approval number provided). Information and consent of the survey participants were conducted in written form prior to survey participation. A copy of the written form of Informed Consent, Privacy and Confidentiality was handed out to the subjects. A further copy was provided for the archive of the WiSo Laboratories.

## Data availability statement

The data are in large parts owned by a German statutory health insurer, the Techniker Krankenkasse. To fulfill the legal requirements to obtain the data, researchers must obtain permission for a specific

1  
2  
3 research question from the German Federal (Social) Insurance Office. Additionally, researchers must  
4 conclude a contract with the statutory health insurer regarding data access.  
5  
6  
7  
8  
9  
10  
11  
12  
13  
14  
15  
16  
17  
18  
19  
20  
21  
22  
23  
24  
25  
26  
27  
28  
29  
30  
31  
32  
33  
34  
35  
36  
37  
38  
39  
40  
41  
42  
43  
44  
45  
46  
47  
48  
49  
50  
51  
52  
53  
54  
55  
56  
57  
58  
59  
60

For peer review only

## REFERENCES

- 1 Kane RL, Shamliyan TA, Mueller C, et al. The association of registered nurse staffing levels and patient outcomes. *Med Care* 2007;45(12):1195–204 (accessed 13 Jun 2018).
- 2 Driscoll A, Grant MJ, Carroll D, et al. The effect of nurse-to-patient ratios on nurse-sensitive patient outcomes in acute specialist units: A systematic review and meta-analysis. *Eur J Cardiovasc Nurs* 2018;17(1):6–22 (accessed 11 Jun 2018).
- 3 Blume K, Dietermann K, Kirchner-Heklau U, et al. Staffing levels and nurse sensitive patient outcomes: Umbrella review and qualitative study. *Health Serv Res* 2021:accepted.
- 4 Cook A, Gaynor M, Stephens M, et al. The effect of a hospital nurse staffing mandate on patient health outcomes: Evidence from California's minimum staffing regulation. *J Health Econ* 2012;31(2):340–48.
- 5 Blegen MA, Goode CJ, Spetz J, et al. Nurse staffing effects on patient outcomes: safety-net and non-safety-net hospitals. *Med Care* 2011;49(4):406–14.
- 6 Aiken LH, Clarke SP, Sloane DM, et al. Hospital nurse staffing and patient mortality, nurse burnout, and job dissatisfaction. *JAMA* 2002;288(16):1987–93.
- 7 Needleman J, Buerhaus P, Pankratz VS, et al. Nurse staffing and inpatient hospital mortality. *N Engl J Med* 2011;364(11):1037–45.
- 8 Needleman J, Buerhaus P, Mattke S, et al. Nurse-staffing levels and the quality of care in hospitals. *N Engl J Med* 2002;346(22):1715–22.
- 9 Stalpers D, De Brouwer BJ, Kaljouw MJ, et al. Associations between characteristics of the nurse work environment and five nurse-sensitive patient outcomes in hospitals: a systematic review of literature. *Int J Nurs Stud* 2015;52(4):817–35.
- 10 Leary A, Cook R, Jones S, et al. Mining routinely collected acute data to reveal non-linear relationships between nurse staffing levels and outcomes. *BMJ Open* 2016;6(12):e011177. doi:10.1136/bmjopen-2016-011177 [published Online First: 16 December 2016].
- 11 Aiken LH, Sloane DM, Ball J, et al. Patient satisfaction with hospital care and nurses in England: an observational study. *BMJ Open* 2018;8(1):e019189.
- 12 Redfern OC, Griffiths P, Maruotti A, et al. The association between nurse staffing levels and the timeliness of vital signs monitoring: a retrospective observational study in the UK. *BMJ Open* 2019;9(9):e032157. doi:10.1136/bmjopen-2019-032157 [published Online First: 27 September 2019].
- 13 Kalisch BJ, Tschannen D, Lee KH. Missed nursing care, staffing, and patient falls. *J Nurs Care Qual* 2012;27(1):6–12.
- 14 Rittenhouse DR, Shortell SM, Fisher ES. Primary care and accountable care—two essential elements of delivery-system reform. *New England Journal of Medicine* 2009;361(24):2301–03.
- 15 Oppel E-M, Young GJ. Nurse Staffing Patterns and Patient Experience of Care: An Empirical Analysis of U.S. Hospitals. *Health Serv Res* 2018;53(3):1799–818. doi:10.1111/1475-6773.12756 [published Online First: 14 August 2017].
- 16 Martsof GR, Gibson TB, Benevent R, et al. An Examination of Hospital Nurse Staffing and Patient Experience with Care: Differences between Cross-Sectional and Longitudinal Estimates. *Health Serv Res* 2016;51(6):2221–41. doi:10.1111/1475-6773.12462 [published Online First: 21 February 2016].
- 17 Aiken LH, Sloane D, Griffiths P, et al. Nursing skill mix in European hospitals: cross-sectional study of the association with mortality, patient ratings, and quality of care. *BMJ Qual Saf* 2017;26(7):559–68.

- 1  
2  
3 18 Hall LM, Doran D, Baker GR, et al. Nurse Staffing Models as Predictors of Patient Outcomes. *Med Care*  
4 2003.  
5  
6 19 Potter P, Barr N, McSweeney M, et al. Identifying nurse staffing and patient outcome relationships: a  
7 guide for change in care delivery. *Nurs Econ* 2003;21(4):158–66.  
8  
9 20 Kutney-Lee A, McHugh MD, Sloane DM, et al. Nursing: a key to patient satisfaction. *Health Aff.*  
10 2009;28(4):w669-77.  
11  
12 21 Aiken LH, Sermeus W, van den Heede K, et al. Patient safety, satisfaction, and quality of hospital care:  
13 cross sectional surveys of nurses and patients in 12 countries in Europe and the United States. *BMJ*  
14 2012;344:e1717.  
15  
16 22 Zhu XW, You LM, Zheng J, et al. Nurse staffing levels make a difference on patient outcomes: a  
17 multisite study in Chinese hospitals. *J Nurs Scholarsh* 2012;44(3):266–73.  
18  
19 23 Papastavrou E, Efstathiou G, Charalambous A. Nurses' and patients' perceptions of caring behaviours:  
20 quantitative systematic review of comparative studies. *J Adv Nurs* 2011;67(6):1191–205.  
21  
22 24 Ausserhofer D, Schubert M, Desmedt M, et al. The association of patient safety climate and nurse-  
23 related organizational factors with selected patient outcomes: a cross-sectional survey. *Int J Nurs*  
24 *Stud* 2013;50(2):240–52.  
25  
26 25 Ball JE, Murrells T, Rafferty AM, et al. 'Care left undone' during nursing shifts: associations with  
27 workload and perceived quality of care. *BMJ Qual Saf* 2014;23(2):116–25.  
28  
29 26 Cho S-H, Mark BA, Knaf G, et al. Relationships between nurse staffing and patients' experiences, and  
30 the mediating effects of missed nursing care. *J Nurs Scholarsh* 2017;49(3):347–55.  
31  
32 27 Griffiths P, Ball J, Drennan J, et al. Nurse staffing and patient outcomes: strengths and limitations of  
33 the evidence to inform policy and practice. A review and discussion paper based on evidence  
34 reviewed for the National Institute for Health and Care Excellence Safe Staffing guideline  
35 development. *Int J Nurs Stud* 2016;63:213–25.  
36  
37 28 Cho SH, Ketefian S, Barkauskas VH, et al. The effects of nurse staffing on adverse events, morbidity,  
38 mortality, and medical costs. *Nurs Res* 2003;52(2):71–79.  
39  
40 29 Kim CG, Bae KS. Relationship between nurse staffing level and adult nursing-sensitive outcomes in  
41 tertiary hospitals of Korea: retrospective observational study. *Int J Nurs Stud* 2018;80:155–64.  
42  
43 30 Weiss ME, Yakusheva O, Bobay KL. Quality and cost analysis of nurse staffing, discharge preparation,  
44 and postdischarge utilization. *Health Serv Res* 2011;46(5):1473–94.  
45  
46 31 Twigg DE, Duffield C, Bremner A, et al. The impact of the nursing hours per patient day (NHPPD)  
47 staffing method on patient outcomes: a retrospective analysis of patient and staffing data. *Int J*  
48 *Nurs Stud* 2011;48(5):540–48.  
49  
50 32 Yakusheva O, Lindrooth R, Weiss M. Economic Evaluation of the 80% Baccalaureate Nurse Workforce  
51 Recommendation: A Patient-level Analysis. *Olga Yakusheva, Richard Lindrooth and Marianne Weiss*  
52 *Medical Care* 2014;52(10):864–69.  
53  
54 33 Keers RN, Williams SD, Cooke J, et al. Understanding the causes of intravenous medication  
55 administration errors in hospitals: a qualitative critical incident study. *BMJ Open*  
56 2015;5(3):e005948. doi:10.1136/bmjopen-2014-005948 [published Online First: 13 March 2015].  
57  
58 34 Lake ET, Shang J, Klaus S, et al. Patient falls: association with hospital Magnet status and nursing unit  
59 staffing. *Res Nurs Health* 2010;33(5):413–25.  
60  
61 35 Dunton N, Gajewski B, Taunton RL, et al. Nurse staffing and patient falls on acute care hospital units.  
62 *Nurs Outlook* 2004;52(1):53–59.  
63  
64 36 Duffield C, Diers D, O'Brien-Pallas L, et al. Nursing staffing, nursing workload, the work environment  
65 and patient outcomes. *Appl Nurs Res* 2011;24(4):244–55.



- 1  
2  
3 37 van den Heede K, Lesaffre E, Diya L, et al. The relationship between inpatient cardiac surgery  
4 mortality and nurse numbers and educational level: analysis of administrative data. *Int J Nurs Stud*  
5 2009b;46(6):796–803.  
6  
7 38 Sales A, Sharp N, Li YF, et al. The association between nursing factors and patient mortality in the  
8 Veterans Health Administration: the view from the nursing unit level. *Med Care* 2008;46(9):938–45.  
9  
10 39 Brubakk K, Svendsen MV, Hofoss D, et al. Associations between work satisfaction, engagement and 7-  
11 day patient mortality: a cross-sectional survey. *BMJ Open* 2019;9(12):e031704.  
12 doi:10.1136/bmjopen-2019-031704 [published Online First: 15 December 2019].  
13  
14 40 Diya L, van den Heede K, Sermeus W, et al. The relationship between in-hospital mortality,  
15 readmission into the intensive care nursing unit and/or operating theatre and nurse staffing levels.  
16 *J Adv Nurs* 2012;68(5):1073–81.  
17  
18 41 Rafferty AM, Clarke SP, Coles J, et al. Outcomes of variation in hospital nurse staffing in English  
19 hospitals: cross-sectional analysis of survey data and discharge records. *Int J Nurs Stud*  
20 2007;44(2):175–82.  
21  
22 42 Dietermann K, Winter V, Schneider U, et al. The impact of nurse staffing levels on nursing-sensitive  
23 patient outcomes: A multilevel regression approach. *European Journal of Health Economics*  
24 2021;accepted.  
25  
26 43 Blume K, Kirchner-Heklau U, Winter V, et al. Construction and validation of a scale to measure the  
27 quality of nurse delivered care in acute care settings. *Working Paper* 2021.  
28  
29 44 National Office of Statistics. Gesundheit: Grunddaten der Krankenhäuser 2017 (Basic data of hospitals  
30 of the year 2017). Wiesbaden: Statistisches Bundesamt (Destatis) 2018.  
31  
32 45 InEK GmbH. G-DRG German diagnosis related groups: Version 2019. Definitionshandbuch, Band 5,  
33 Anhang C. Siegburg 2018.  
34  
35 46 Elixhauser A, Steiner C, Harris DR, et al. Comorbidity measures for use with administrative data. *Med*  
36 *Care* 1998;36(1):8–27.  
37  
38 47 Cho SH, Yun SC. Bed-to-nurse ratios, provision of basic nursing care, and in-hospital and 30-day  
39 mortality among acute stroke patients admitted to an intensive care unit: cross-sectional analysis  
40 of survey and administrative data. *Int J Nurs Stud* 2009;46(8):1092–101.  
41  
42 48 O'Brien-Pallas L, Li XM, Wang S, et al. Evaluation of a patient care delivery model: system outcomes in  
43 acute cardiac care. *Can J Nurs Res* 2010;42(4):98–120.  
44  
45 49 Sochalski J. Is more better?: the relationship between nurse staffing and the quality of nursing care in  
46 hospitals. *Med Care* 2004;42:II67-II73.  
47  
48 50 Needleman J, Buerhaus PI, Stewart M, et al. Nurse staffing in hospitals: is there a business case for  
49 quality? *Health Aff.* 2006;25(1):204–11.  
50  
51 51 West E, Barron DN, Harrison D, et al. Nurse staffing, medical staffing and mortality in intensive care:  
52 an observational study. *Int J Nurs Stud* 2014;51(5):781–94.  
53  
54 52 Opiel E-M, Mohr DC. "Paying it forward": The link between providers' civility climate, civility toward  
55 patients and patient experience outcomes. *Health Care Manage Rev* 2020;45(2):141–50.  
56  
57 53 van Bogaert P, Timmermans O, Weeks SM, et al. Nursing unit teams matter: impact of unit-level nurse  
58 practice environment, nurse work characteristics, and burnout on nurse reported job outcomes,  
59 and quality of care, and patient adverse events-a cross-sectional survey. *Int J Nurs Stud*  
60 2014;51(8):1123–34.  
61  
62 54 Choi J, Staggs VS. Comparability of nurse staffing measures in examining the relationship between RN  
63 staffing and unit-acquired pressure ulcers: a unit-level descriptive, correlational study. *Int J Nurs*  
64 *Stud* 2014;51(10):1344–52.

1  
2  
3 55 Winter V, Schreyögg J, Thiel A. Hospital staff shortages: Environmental and organizational  
4 determinants and implications for patient satisfaction. *Health Policy* 2020;124(4):380–88.  
5  
6  
7  
8  
9  
10  
11  
12  
13  
14  
15  
16  
17  
18  
19  
20  
21  
22  
23  
24  
25  
26  
27  
28  
29  
30  
31  
32  
33  
34  
35  
36  
37  
38  
39  
40  
41  
42  
43  
44  
45  
46  
47  
48  
49  
50  
51  
52  
53  
54  
55  
56  
57  
58  
59  
60

For peer review only

## Nurse staffing and patient-perceived quality of nursing care: A cross-sectional analysis of survey and administrative data in German hospitals

### Appendix

**Table A.1: Mean PTN ratio and skill mix ratio per unit type**

| unit type          | patients      | patient-to nurse ratio (mean) | skill mix ratio (mean) |
|--------------------|---------------|-------------------------------|------------------------|
| internal medicine  | 6,260         | 5.92                          | 7.54                   |
| geriatrics         | 106           | 8.75                          | 11.91                  |
| cardiology         | 1,698         | 4.68                          | 5.85                   |
| nephrology         | 61            | 4.78                          | 4.70                   |
| hematology         | 181           | 5.31                          | 5.56                   |
| endocrinology      | 22            | 8.41                          | 13.59                  |
| gastroenterology   | 378           | 6.20                          | 8.30                   |
| pneumology         | 200           | 4.91                          | 7.68                   |
| rheumatology       | 121           | 9.75                          | 9.71                   |
| pulmonary medicine | 77            | 6.16                          | 6.14                   |
| general surgery    | 7,512         | 5.87                          | 6.59                   |
| trauma surgery     | 1,784         | 6.50                          | 7.14                   |
| neurosurgery       | 582           | 5.90                          | 5.64                   |
| vascular surgery   | 300           | 5.76                          | 4.98                   |
| plastic surgery    | 186           | 5.01                          | 4.30                   |
| thoracic surgery   | 81            | 5.25                          | 6.44                   |
| heart surgery      | 319           | 3.77                          | 5.08                   |
| urology            | 2,396         | 6.27                          | 5.45                   |
| orthopedics        | 2,753         | 6.05                          | 6.94                   |
| neurology          | 1,951         | 5.36                          | 6.26                   |
| nuclear medicine   | 103           | 4.26                          | 3.33                   |
| radiotherapy       | 53            | 5.32                          | 5.27                   |
| dermatology        | 760           | 5.93                          | 4.87                   |
| dentistry          | 252           | 4.85                          | 4.41                   |
| <b>total</b>       | <b>28,136</b> | <b>5.84</b>                   | <b>6.61</b>            |

Nurse staffing and patient-perceived quality of nursing care

Table A.2: Regression results generalized random intercept model (odds ratios)

| effect <sup>†</sup>       | (1) general nursing care       | (2) guidance                   | (3) loyalty                    |
|---------------------------|--------------------------------|--------------------------------|--------------------------------|
| $\overline{PTN}$          | 0.951 [0.010]<br>(0.915;0.988) | 0.943 [0.010]<br>(0.902;0.986) | 0.929 [0.000]<br>(0.897;0.963) |
| $\overline{PTN}^2$        | 1.003 [0.035]<br>(1.000;1.005) | 1.003 [0.035]<br>(1.001;1.006) | 1.004 [0.001]<br>(1.002;1.006) |
| $\overline{skill}$        | 0.995 [0.050]<br>(0.991;1.000) | 0.997 [0.050]<br>(0.991;1.002) | 0.991 [0.000]<br>(0.986;0.995) |
| PCCL                      | 0.876 [0.000]<br>(0.851;0.900) | 0.875 [0.000]<br>(0.846;0.906) | 0.944 [0.000]<br>(0.922;0.967) |
| age                       | 1.080 [0.000]<br>(1.066;1.094) | 1.061 [0.000]<br>(1.045;1.077) | 1.034 [0.000]<br>(1.024;1.045) |
| age <sup>2</sup>          | 0.999 [0.000]<br>(0.999;1.000) | 1.000 [0.000]<br>(0.999;1.000) | 1.000 [0.000]<br>(1.000;1.000) |
| gender<br>(= 1 if female) | 0.903 [0.000]<br>(0.854;0.955) | 0.934 [0.000]<br>(0.874;0.999) | 0.822 [0.000]<br>(0.781;0.865) |
| rurality                  | 1.060 [0.000]<br>(1.029;1.091) | 1.025 [0.000]<br>(0.991;1.062) | 1.010 [0.463]<br>(0.984;1.037) |
| $\overline{PTP}$          | 0.997 [0.278]<br>(0.992;1.002) | 0.998 [0.278]<br>(0.992;1.004) | 0.997 [0.140]<br>(0.993;1.001) |
| observations              | 28,136                         | 28,136                         | 28,136                         |

P-values in square brackets, 95%-confidence intervals in parentheses

Abbreviations:  $\overline{PTN}$ : mean-centered patient-to-nurse ratio;  $\overline{skill}$ : mean-centered skill-mix ratio; PCCL: Patient Clinical Complexity Level index

†Fixed effects for unit types, months, and bed categories (50—299, 300—499, 500—749, and at least 750) and between-unit effects for PTN and skill mix included but not shown.

Table A.3: Regression results subgroup analysis case severity

| effect <sup>†</sup>       | (1) general nursing care          |                                   | (2) guidance                      |                                   | (3) loyalty                       |                                   |
|---------------------------|-----------------------------------|-----------------------------------|-----------------------------------|-----------------------------------|-----------------------------------|-----------------------------------|
|                           | low (PCCL=0)                      | high (PCCL>0) <sup>††</sup>       | low (PCCL=0)                      | high (PCCL>0) <sup>††</sup>       | low (PCCL=0)                      | high (PCCL>0) <sup>††</sup>       |
| $\overline{PTN}$          | -0.019 [0.009]<br>(-0.033;-0.005) | -0.022 [0.121]<br>(-0.051;-0.003) | -0.021 [0.051]<br>(-0.043;0.000)  | -0.024 [0.245]<br>(-0.063;0.016)  | -0.025 [0.001]<br>(-0.040;-0.010) | -0.022 [0.142]<br>(-0.050;-0.007) |
| $\overline{PTN}^2$        | 0.001 [0.009]<br>(0.000;0.002)    | 0.001 [0.222]<br>(-0.001;0.003)   | 0.001 [0.066]<br>(0.0000;0.003)   | 0.001 [0.312]<br>(-0.001;0.004)   | 0.001 [0.004]<br>(0.000;0.002)    | 0.001 [0.375]<br>(-0.001;0.003)   |
| $\overline{skill}$        | -0.003 [0.001]<br>(-0.005;-0.001) | -0.003 [0.070]<br>(-0.006;0.000)  | -0.005 [0.000]<br>(-0.008;-0.003) | -0.004 [0.079]<br>(-0.008;0.000)  | -0.004 [0.000]<br>(-0.005;-0.002) | -0.003 [0.059]<br>(-0.006;0.000)  |
| PCCL                      | —<br>—                            | -0.038 [0.000]<br>(-0.055;-0.021) | —<br>—                            | -0.008 [0.505]<br>(-0.032;0.016)  | —<br>—                            | -0.021 [0.017]<br>(-0.038;-0.004) |
| age                       | 0.018 [0.000]<br>(0.014;0.022)    | 0.030 [0.000]<br>(0.022;0.038)    | 0.015 [0.000]<br>(0.009;0.021)    | 0.022 [0.000]<br>(0.011;0.033)    | 0.015 [0.000]<br>(0.011;0.019)    | 0.022 [0.000]<br>(0.014;0.030)    |
| age <sup>2</sup>          | 0.000 [0.000]<br>(0.000;0.000)    | 0.000 [0.000]<br>(0.000;0.000)    | 0.000 [0.024]<br>(0.000;0.000)    | 0.000 [0.001]<br>(0.000;0.000)    | 0.000 [0.000]<br>(0.000;0.000)    | 0.000 [0.000]<br>(0.000;0.000)    |
| gender<br>(= 1 if female) | -0.190 [0.000]<br>(-0.211;-0.169) | -0.193 [0.004]<br>(-0.231;-0.154) | -0.283 [0.000]<br>(-0.315;-0.252) | -0.252 [0.000]<br>(-0.306;-0.198) | -0.142 [0.000]<br>(-0.164;-0.120) | -0.128 [0.000]<br>(-0.167;-0.089) |
| rurality                  | 0.009 [0.125]<br>(-0.002;0.020)   | 0.029 [0.004]<br>(0.009;0.048)    | 0.021 [0.015]<br>(0.004;0.037)    | 0.050 [0.000]<br>(0.023;0.077)    | -0.001 [0.848]<br>(-0.013;0.010)  | 0.020 [0.050]<br>(0.000;0.039)    |
| $\overline{PTP}$          | -0.001 [0.175]<br>(-0.003;0.001)  | -0.003 [0.073]<br>(-0.006;0.000)  | -0.002 [0.226]<br>(-0.004;0.001)  | -0.005 [0.027]<br>(-0.010;-0.001) | -0.001 [0.120]<br>(-0.003;0.000)  | -0.003 [0.039]<br>(-0.007;0.000)  |
| observations              | 20,624                            | 7,512                             | 20,624                            | 7,512                             | 20,624                            | 7,512                             |

P-values in square brackets, 95%-confidence intervals in parentheses

Abbreviations:  $\overline{PTN}$ : mean-centered patient-to-nurse ratio;  $\overline{skill}$ : mean-centered skill-mix ratio; PCCL: Patient Clinical Complexity Level index

†Fixed effects for months and bed categories (50—299, 300—499, 500—749, and at least 750) and between-unit effects for PTN and skill mix included but not shown.

†† Subgroup “high” comprises patients with a PCCL from 1 to 6.

## Nurse staffing and patient-perceived quality of nursing care

Table A.4: Regression results subgroup analysis hospital size<sup>††</sup>

| effect <sup>†</sup>       | (1) general nursing care          |                                   | (2) guidance                      |                                   | (3) loyalty                       |                                   |
|---------------------------|-----------------------------------|-----------------------------------|-----------------------------------|-----------------------------------|-----------------------------------|-----------------------------------|
|                           | small                             | large                             | small                             | large                             | small                             | large                             |
| $\overline{PTN}$          | -0.018 [0.024]<br>(-0.034;-0.002) | -0.015 [0.186]<br>(-0.037;0.007)  | -0.009 [0.447]<br>(-0.033;-0.015) | -0.031 [0.058]<br>(-0.063;0.001)  | -0.024 [0.005]<br>(-0.040;-0.007) | -0.014 [0.216]<br>(-0.037;0.008)  |
| $\overline{PTN}^2$        | 0.001 [0.048]<br>(0.000;0.002)    | 0.001 [0.155]<br>(0.000;0.002)    | 0.000 [0.660]<br>(-0.001;0.002)   | 0.002 [0.041]<br>(0.000;0.004)    | 0.001 [0.035]<br>(0.000;0.002)    | 0.001 [0.245]<br>(-0.001;0.002)   |
| $\overline{skill}$        | -0.004 [0.000]<br>(-0.006;-0.002) | -0.002 [0.183]<br>(-0.004;0.001)  | -0.005 [0.002]<br>(-0.008;-0.002) | -0.004 [0.009]<br>(-0.008;-0.001) | -0.005 [0.000]<br>(-0.007;-0.003) | -0.001 [0.369]<br>(-0.003;0.001)  |
| PCCL                      | -0.050 [0.000]<br>(-0.062;-0.037) | -0.046 [0.000]<br>(-0.058;-0.035) | -0.043 [0.000]<br>(-0.062;-0.024) | -0.028 [0.002]<br>(-0.045;-0.011) | -0.034 [0.000]<br>(-0.047;-0.021) | -0.022 [0.000]<br>(-0.035;-0.010) |
| age                       | 0.026 [0.000]<br>(0.021;0.030)    | 0.017 [0.000]<br>(0.012;0.022)    | 0.023 [0.000]<br>(0.016;0.030)    | 0.012 [0.002]<br>(0.004;0.019)    | 0.022 [0.000]<br>(0.017;0.027)    | 0.013 [0.000]<br>(0.008;0.018)    |
| age <sup>2</sup>          | 0.000 [0.000]<br>(0.000;0.000)    | 0.000 [0.000]<br>(0.000;0.000)    | 0.000 [0.000]<br>(0.000;0.000)    | 0.000 [0.097]<br>(0.000;0.000)    | 0.000 [0.000]<br>(0.000;0.000)    | 0.000 [0.002]<br>(0.000;0.000)    |
| gender<br>(= 1 if female) | -0.165 [0.000]<br>(-0.189;-0.140) | -0.223 [0.000]<br>(-0.251;-0.195) | -0.245 [0.000]<br>(-0.282;-0.208) | -0.311 [0.000]<br>(-0.351;-0.271) | -0.116 [0.000]<br>(-0.141;-0.090) | -0.166 [0.000]<br>(-0.195;-0.138) |
| rurality                  | 0.010 [0.148]<br>(0.003;0.023)    | 0.020 [0.006]<br>(0.006;0.034)    | 0.033 [0.001]<br>(0.013;0.053)    | 0.024 [0.020]<br>(0.004;0.044)    | -0.007 [0.337]<br>(-0.020;0.007)  | 0.017 [0.020]<br>(0.003;0.032)    |
| $\overline{PTP}$          | 0.000 [0.885]<br>(-0.002;0.002)   | -0.004 [0.006]<br>(-0.006;-0.034) | -0.001 [0.711]<br>(-0.003;0.002)  | -0.006 [0.007]<br>(-0.009;-0.002) | 0.000 [0.884]<br>(-0.002;0.002)   | -0.005 [0.000]<br>(-0.008;-0.002) |
| observations              | 14,387                            | 13,749                            | 14,387                            | 13,749                            | 14,387                            | 13,749                            |

P-values in square brackets, 95%-confidence intervals in parentheses

Abbreviations:  $\overline{PTN}$ : mean-centered patient-to-nurse ratio;  $\overline{skill}$ : mean-centered skill-mix ratio; PCCL: Patient Clinical Complexity Level index

<sup>†</sup>Fixed effects for months and bed categories (50—299, 300—499, 500—749, and at least 750) and between-unit effects for PTN and skill mix included but not shown.

<sup>††</sup> subgroup small comprises hospitals with less than 500 bed; subgroup large comprises hospitals with 500 beds and more

Table A.5: Regression results subgroup analysis medical vs. surgical patients

| effect <sup>†</sup>       | (1) general nursing care          |                                   | (2) guidance                      |                                   | (3) loyalty                       |                                   |
|---------------------------|-----------------------------------|-----------------------------------|-----------------------------------|-----------------------------------|-----------------------------------|-----------------------------------|
|                           | medical                           | surgical                          | medical                           | surgical                          | medical                           | surgical                          |
| $\overline{PTN}$          | -0.014 [0.216]<br>(-0.037;0.008)  | -0.012 [0.159]<br>(-0.029;-0.005) | -0.042 [0.015]<br>(-0.075;-0.008) | -0.008 [0.510]<br>(-0.032;-0.016) | -0.058 [0.000]<br>(-0.081;-0.034) | -0.005 [0.594]<br>(-0.022;-0.013) |
| $\overline{PTN}^2$        | 0.001 [0.245]<br>(-0.001;0.002)   | 0.000 [0.412]<br>(-0.001;0.002)   | 0.003 [0.003]<br>(0.001;0.005)    | 0.000 [0.965]<br>(-0.002;0.002)   | 0.004 [0.000]<br>(0.002;0.005)    | 0.000 [0.831]<br>(-0.001;0.001)   |
| $\overline{skill}$        | -0.001 [0.369]<br>(-0.003;0.001)  | -0.003 [0.006]<br>(-0.005;-0.001) | -0.004 [0.039]<br>(-0.007;0.000)  | -0.005 [0.001]<br>(-0.008;-0.002) | -0.003 [0.025]<br>(-0.005;0.000)  | -0.003 [0.002]<br>(-0.006;-0.001) |
| PCCL                      | -0.022 [0.000]<br>(-0.035;-0.010) | -0.060 [0.000]<br>(-0.072;-0.047) | -0.021 [0.035]<br>(0.004;-0.022)  | -0.051 [0.000]<br>(-0.069;-0.033) | -0.019 [0.006]<br>(-0.033;-0.006) | -0.040 [0.000]<br>(-0.053;-0.027) |
| age                       | 0.013 [0.000]<br>(0.008;0.018)    | 0.023 [0.000]<br>(0.018;0.028)    | 0.013 [0.003]<br>(0.004;0.022)    | 0.021 [0.000]<br>(0.014;0.028)    | 0.016 [0.000]<br>(0.010;0.022)    | 0.021 [0.000]<br>(0.016;0.026)    |
| age <sup>2</sup>          | 0.000 [0.002]<br>(0.000;0.000)    | 0.000 [0.000]<br>(0.000;0.000)    | 0.000 [0.085]<br>(0.000;0.000)    | 0.000 [0.000]<br>(0.000;0.000)    | 0.000 [0.000]<br>(0.000;0.000)    | 0.000 [0.000]<br>(0.000;0.000)    |
| gender<br>(= 1 if female) | -0.166 [0.000]<br>(-0.195;-0.138) | -0.183 [0.000]<br>(-0.208;-0.159) | -0.294 [0.000]<br>(-0.338;-0.250) | -0.255 [0.000]<br>(-0.291;-0.219) | -0.165 [0.000]<br>(-0.195;-0.134) | -0.122 [0.000]<br>(-0.141;-0.097) |
| rurality                  | 0.017 [0.020]<br>(0.003;0.032)    | 0.017 [0.015]<br>(0.003;0.030)    | 0.018 [0.118]<br>(-0.005;0.041)   | 0.038 [0.000]<br>(0.019;0.057)    | 0.001 [0.886]<br>(-0.017;0.015)   | 0.007 [0.293]<br>(-0.006;-0.021)  |
| $\overline{PTP}$          | -0.005 [0.020]<br>(-0.008;-0.002) | 0.001 [0.490]<br>(-0.002;0.004)   | -0.004 [0.024]<br>(-0.008;-0.001) | 0.000 [0.819]<br>(-0.004;0.005)   | -0.004 [0.005]<br>(-0.006;-0.001) | 0.000 [0.764]<br>(-0.003;0.003)   |
| observations              | 11,868                            | 13,769                            | 11,868                            | 13,769                            | 11,868                            | 13,769                            |

P-values in square brackets, 95%-confidence intervals in parentheses

Abbreviations:  $\overline{PTN}$ : mean-centered patient-to-nurse ratio;  $\overline{skill}$ : mean-centered skill-mix ratio; PCCL: Patient Clinical Complexity Level index

<sup>†</sup>Fixed effects for months and bed categories (50—299, 300—499, 500—749, and at least 750) and between-unit effects for PTN and skill mix included but not shown.

STROBE Statement—Checklist of items that should be included in reports of *cross-sectional studies*

|                           | Item No | Recommendation                                                                                                                                                                                    | page              |
|---------------------------|---------|---------------------------------------------------------------------------------------------------------------------------------------------------------------------------------------------------|-------------------|
| <b>Title and abstract</b> | 1       | (a) Indicate the study's design with a commonly used term in the title or the abstract                                                                                                            | p. 1              |
|                           |         | (b) Provide in the abstract an informative and balanced summary of what was done and what was found                                                                                               | p. 2              |
| <b>Introduction</b>       |         |                                                                                                                                                                                                   |                   |
| Background/rationale      | 2       | Explain the scientific background and rationale for the investigation being reported                                                                                                              | p. 4              |
| Objectives                | 3       | State specific objectives, including any prespecified hypotheses                                                                                                                                  | p. 5              |
| <b>Methods</b>            |         |                                                                                                                                                                                                   |                   |
| Study design              | 4       | Present key elements of study design early in the paper                                                                                                                                           | p. 5 ff.          |
| Setting                   | 5       | Describe the setting, locations, and relevant dates, including periods of recruitment, exposure, follow-up, and data collection                                                                   | p. 6              |
| Participants              | 6       | (a) Give the eligibility criteria, and the sources and methods of selection of participants                                                                                                       | p. 6              |
| Variables                 | 7       | Clearly define all outcomes, exposures, predictors, potential confounders, and effect modifiers. Give diagnostic criteria, if applicable                                                          | p. 6 ff.          |
| Data sources/measurement  | 8*      | For each variable of interest, give sources of data and details of methods of assessment (measurement). Describe comparability of assessment methods if there is more than one group              | p. 6 ff.          |
| Bias                      | 9       | Describe any efforts to address potential sources of bias                                                                                                                                         | p. 8 f.           |
| Study size                | 10      | Explain how the study size was arrived at                                                                                                                                                         | p. 6              |
| Quantitative variables    | 11      | Explain how quantitative variables were handled in the analyses. If applicable, describe which groupings were chosen and why                                                                      | p. 6 ff.          |
| Statistical methods       | 12      | (a) Describe all statistical methods, including those used to control for confounding                                                                                                             | p. 8 f.           |
|                           |         | (b) Describe any methods used to examine subgroups and interactions                                                                                                                               | p. 8 f.           |
|                           |         | (c) Explain how missing data were addressed                                                                                                                                                       | p. 9              |
|                           |         | (d) If applicable, describe analytical methods taking account of sampling strategy                                                                                                                | n.a.              |
|                           |         | (e) Describe any sensitivity analyses                                                                                                                                                             | p. 8 f.           |
| <b>Results</b>            |         |                                                                                                                                                                                                   |                   |
| Participants              | 13*     | (a) Report numbers of individuals at each stage of study—eg numbers potentially eligible, examined for eligibility, confirmed eligible, included in the study, completing follow-up, and analysed | p. 6              |
|                           |         | (b) Give reasons for non-participation at each stage                                                                                                                                              | n.a.              |
|                           |         | (c) Consider use of a flow diagram                                                                                                                                                                | n.a.              |
| Descriptive data          | 14*     | (a) Give characteristics of study participants (eg demographic, clinical, social) and information on exposures and potential confounders                                                          | p. 9, table A.1   |
|                           |         | (b) Indicate number of participants with missing data for each variable of interest                                                                                                               | n.a.              |
| Outcome data              | 15*     | Report numbers of outcome events or summary measures                                                                                                                                              | p. 9, table 2     |
| Main results              | 16      | (a) Give unadjusted estimates and, if applicable, confounder-adjusted estimates and their precision (eg, 95% confidence interval). Make clear                                                     | p. 10 f., table 3 |

|                          |    |                                                                                                                                                                            |                                        |
|--------------------------|----|----------------------------------------------------------------------------------------------------------------------------------------------------------------------------|----------------------------------------|
|                          |    | which confounders were adjusted for and why they were included                                                                                                             |                                        |
|                          |    | (b) Report category boundaries when continuous variables were categorized                                                                                                  | p. 8 f.                                |
|                          |    | (c) If relevant, consider translating estimates of relative risk into absolute risk for a meaningful time period                                                           | n.a.                                   |
| Other analyses           | 17 | Report other analyses done—eg analyses of subgroups and interactions, and sensitivity analyses                                                                             | p. 10 f., tables<br>A.2, A.3, A.4, A.5 |
| <b>Discussion</b>        |    |                                                                                                                                                                            |                                        |
| Key results              | 18 | Summarise key results with reference to study objectives                                                                                                                   | p. 11 f.                               |
| Limitations              | 19 | Discuss limitations of the study, taking into account sources of potential bias or imprecision. Discuss both direction and magnitude of any potential bias                 | p. 14                                  |
| Interpretation           | 20 | Give a cautious overall interpretation of results considering objectives, limitations, multiplicity of analyses, results from similar studies, and other relevant evidence | p. 11 ff.                              |
| Generalisability         | 21 | Discuss the generalisability (external validity) of the study results                                                                                                      | p. 11 ff.                              |
| <b>Other information</b> |    |                                                                                                                                                                            |                                        |
| Funding                  | 22 | Give the source of funding and the role of the funders for the present study and, if applicable, for the original study on which the present article is based              | p. 18                                  |

\*Give information separately for exposed and unexposed groups.

**Note:** An Explanation and Elaboration article discusses each checklist item and gives methodological background and published examples of transparent reporting. The STROBE checklist is best used in conjunction with this article (freely available on the Web sites of PLoS Medicine at <http://www.plosmedicine.org/>, Annals of Internal Medicine at <http://www.annals.org/>, and Epidemiology at <http://www.epidem.com/>). Information on the STROBE Initiative is available at [www.strobe-statement.org](http://www.strobe-statement.org).

# BMJ Open

## Nurse staffing and patient-perceived quality of nursing care: A cross-sectional analysis of survey and administrative data in German hospitals

|                                 |                                                                                                                                                                                                                                                                          |
|---------------------------------|--------------------------------------------------------------------------------------------------------------------------------------------------------------------------------------------------------------------------------------------------------------------------|
| Journal:                        | <i>BMJ Open</i>                                                                                                                                                                                                                                                          |
| Manuscript ID                   | bmjopen-2021-051133.R1                                                                                                                                                                                                                                                   |
| Article Type:                   | Original research                                                                                                                                                                                                                                                        |
| Date Submitted by the Author:   | 30-Aug-2021                                                                                                                                                                                                                                                              |
| Complete List of Authors:       | Winter, Vera; University of Wuppertal; University of Hamburg<br>Dietermann, Karina; University of Hamburg, Hamburg Center for Health Economics<br>Schneider, Udo; Techniker Krankenkasse<br>Schreyögg, Jonas; University of Hamburg, Hamburg Center for Health Economics |
| <b>Primary Subject Heading</b>: | Health services research                                                                                                                                                                                                                                                 |
| Secondary Subject Heading:      | Nursing                                                                                                                                                                                                                                                                  |
| Keywords:                       | Human resource management < HEALTH SERVICES ADMINISTRATION & MANAGEMENT, Quality in health care < HEALTH SERVICES ADMINISTRATION & MANAGEMENT, Health & safety < HEALTH SERVICES ADMINISTRATION & MANAGEMENT                                                             |
|                                 |                                                                                                                                                                                                                                                                          |

SCHOLARONE™  
Manuscripts





I, the Submitting Author has the right to grant and does grant on behalf of all authors of the Work (as defined in the below author licence), an exclusive licence and/or a non-exclusive licence for contributions from authors who are: i) UK Crown employees; ii) where BMJ has agreed a CC-BY licence shall apply, and/or iii) in accordance with the terms applicable for US Federal Government officers or employees acting as part of their official duties; on a worldwide, perpetual, irrevocable, royalty-free basis to BMJ Publishing Group Ltd ("BMJ") its licensees and where the relevant Journal is co-owned by BMJ to the co-owners of the Journal, to publish the Work in this journal and any other BMJ products and to exploit all rights, as set out in our [licence](#).

The Submitting Author accepts and understands that any supply made under these terms is made by BMJ to the Submitting Author unless you are acting as an employee on behalf of your employer or a postgraduate student of an affiliated institution which is paying any applicable article publishing charge ("APC") for Open Access articles. Where the Submitting Author wishes to make the Work available on an Open Access basis (and intends to pay the relevant APC), the terms of reuse of such Open Access shall be governed by a Creative Commons licence – details of these licences and which [Creative Commons](#) licence will apply to this Work are set out in our licence referred to above.

Other than as permitted in any relevant BMJ Author's Self Archiving Policies, I confirm this Work has not been accepted for publication elsewhere, is not being considered for publication elsewhere and does not duplicate material already published. I confirm all authors consent to publication of this Work and authorise the granting of this licence.

1  
2  
3 **Nurse staffing and patient-perceived quality of nursing care: A cross-sectional analysis of survey and**  
4 **administrative data in German hospitals**  
5  
6  
7

8 Vera Winter<sup>a,b</sup>, Karina Dietermann<sup>b</sup>, Udo Schneider<sup>c</sup>, Jonas Schreyögg<sup>b</sup>  
9

10  
11 Author affiliations:  
12

13 <sup>a</sup> Schumpeter School of Business and Economics, University of Wuppertal, Rainer-Gruenter-Str. 21,  
14 42119 Wuppertal, Germany, winter@wiwi.uni-wuppertal.de. *Corresponding author*  
15

16 <sup>b</sup> Hamburg Center for Health Economics, University of Hamburg, Hamburg, Germany  
17

18 <sup>c</sup> Techniker Krankenkasse, Hamburg, Germany  
19  
20  
21  
22  
23  
24

25 **Word count of the manuscript: 5,100**  
26  
27  
28  
29  
30  
31  
32  
33  
34  
35  
36  
37  
38  
39  
40  
41  
42  
43  
44  
45  
46  
47  
48  
49  
50  
51  
52  
53  
54  
55  
56  
57  
58  
59  
60

## Abstract

**Objective:** To examine the impact of nurse staffing on patient-perceived quality of nursing care. We differentiate nurse staffing levels and nursing skill mix as two facets of nurse staffing and use a multi-dimensional instrument for patient-perceived quality of nursing care. We investigate non-linear and interaction effects.

**Setting:** The study setting was 3,458 hospital units in 1,017 hospitals in Germany.

**Participants:** We contacted 212,554 patients discharged from non-pediatric, non-intensive, and non-psychiatric hospital units who stayed at least two nights in the hospital between January and October 2019. Of those, 30,174 responded, yielding a response rate of 14.2%. Our sample included only those patients. After excluding extreme values for our nurse staffing variables and removing observations with missing values, our final sample comprised 28,136 patients ranging from 18 to 97 years of age (average: 61.12 years) who had been discharged from 3,458 distinct hospital units in 1,017 hospitals.

**Primary and secondary outcome measures:** Patient-perceived quality of nursing care (general nursing care, guidance provided by nurses, and patient loyalty to the hospital)

**Results:** For all three dimensions of patient-perceived quality of nursing care, we found that they significantly decreased as (a) nurse staffing levels decreased (with decreasing marginal effects) and (b) the proportion of assistant nurses in a hospital unit increased. The association between nurse staffing levels and quality of nursing care was more pronounced among patients who were less clinically complex, were admitted to smaller hospitals, or were admitted to medical units.

**Conclusions:** Our results indicate that, in addition to nurse staffing levels, nursing skill mix is crucial for providing the best possible quality of nursing care from the patient perspective and both should be considered when designing policies such as minimum staffing regulations to improve the quality of nursing care in hospitals.

## Article summary

### Strengths and limitations of this study

- This study combines administrative data on hospital unit level nurse staffing with a multi-dimensional survey instrument that covers three aspects of patient-perceived quality of nursing care in a sample of 28,136 patients discharged from 3,458 hospital units in Germany in 2019
- This study demonstrates that the effect of nurse staffing on patient-perceived quality of care is non-linear and depending on patient and hospital characteristics (patient case severity, hospital size, and medical versus surgical patients)
- Besides patient-to-nurse ratios, the study also adds insight on the effect of skill mix and patient-to-physician ratios on patient-perceived quality of nursing care
- The study is cross-sectional and cannot account for all potential endogeneity problems / Even though considering the hospital unit type level is advantageous to using hospital-level aggregated data, omitted variables on hospital unit and patient level might remain.

### Keywords (MeSH Terms)

Nursing Staff, Hospital; Health Workforce; Nurse-Patient Relations; Nursing Care; Patient-Centered Care; Health Care Surveys

## INTRODUCTION AND BACKGROUND

Nurses are responsible for delivering the highest proportion of care to patients in hospitals and therefore a main contributor to quality of hospital care. Nurses who work on units with inadequate staffing are probably not working as effective and efficient as nurses on better-staffed and better-skilled units. As a result, nurses do not have enough time for providing care and instructions, observe vital signs timely, and to respond to patients' individual needs., which leads to missed care and ultimately unfavourable clinical patient outcomes and bad patient experiences and perceptions of quality of care. A large body of empirical studies, including several literature reviews and meta-analyses, has examined how nurse staffing levels affect patient outcomes.[1–10] Most studies have thereby relied on clinical outcomes available in administrative data and e.g. found significant effects of nurse staffing on mortality, pressure ulcers, and pneumonia.[3] Several studies depict that the effect of inadequate nurse staffing on adverse events is through missed care.[11–13] In light of calls for care (and, indeed, research) to be more patient oriented and for health systems to become more responsive to patient needs and expectations,[14–16] the number of studies examining links between nurse staffing patterns and patient experiences of care – i.e., perceived quality of care – has steadily grown.[15–17] In addition, in the wake of many studies on the effects of skill mix on clinical outcomes,[see 3] recent studies investigated the association between skill mix and patient-perceived quality of care.[15, 18, 19]

Several empirical studies that have analyzed the relationship between nurse staffing levels and perceived quality of care have considered the nurse's rather than the patient's perspective.[19–22] While the former is of course crucial, there is evidence that nurses' perceptions of the quality of their work can deviate substantially from the patients' perceptions[23]. In addition, most studies that have analyzed quality of care as an outcome have used measures that are very general (e.g., single items to rate overall quality of care or patient safety).[17, 22, 24, 25] Outcome measures like these are less informative about the quality of care provided by nurses and therefore potentially less sensitive to nurse staffing. Some studies have used multi-dimensional constructs of patient satisfaction or patient experience with care. Yet, these constructs usually comprise dimensions and indicators that do not relate to nursing care, but other aspects, such as responsiveness of hospital staff, discharge information, and overall hospital rating, all of which are also indicators of other health professionals' quality of care.[11, 16, 20, 26] . Only a handful of studies have used items that ask directly about the quality of care provided by nurses, or quality of nursing care.[20–22] To our knowledge, no studies to date have used a validated, multi-item, and multi-dimensional scale for patient-perceived quality of nursing care.

1  
2  
3 Methodologically, examining the link between nurse staffing and patient outcomes is at risk of  
4 endogeneity problems, such as omitted variable bias (e.g., skill mix, hospital-unit-type and patient  
5 characteristics, or physician staffing could all be related to nurse staffing and patient outcomes) or  
6 endogenous sorting (whereby hospitals devote more resources to patients with a higher risk of adverse  
7 outcomes).[1, 4, 8, 16, 27] The risk of endogeneity increases with the level of aggregation; as many  
8 studies use staffing information at the aggregated hospital level,[6, 17, 20, 21, 28, 29] they do not  
9 consider important information at the level of hospital units [7, 30, 31] or of patients.[16, 32] At the  
10 other extreme, using micro level data on the patient level [as e.g., 32, 33] usually implies substantial  
11 primary data collection efforts and a focus on one or few organizations, hence limiting generalizability.  
12 As an in-between approach, the number of studies using data at the level of hospital units has grown,[7,  
13 31, 34–39] yet often suffers from limited sample sizes both in terms of patients and hospitals.[15] In  
14 addition, recent evidence hints to the fact the effect of nurse staffing on quality of nursing care non-  
15 linear, i.e., the effect of an additional nurse per patient might be high if nurse staffing is low; with higher  
16 numbers of nurses, the effect of each additional nurse probably decreases.[15] Furthermore, recent  
17 studies indicate that the association between nurse staffing and patient outcomes can differ depending  
18 on patients' case severity,[8, 40] hospital size,[6, 41], and between medical versus surgical units.[8, 28]  
19 Yet most of these studies have analyzed the associations between nurse staffing and clinical patient  
20 outcomes.  
21  
22  
23  
24  
25  
26  
27  
28  
29  
30  
31  
32  
33

34 The present study aims to shed further light on the association between nurse staffing and patient-  
35 perceived quality of nursing care. In particular, we examine this relationship between nurse staffing  
36 levels, nurse skill mix, and patient-perceived quality of nursing care based on large-scale survey data  
37 combined with administrative data. Especially the use of a multi-dimensional survey instrument  
38 reflecting the patient perspective on nursing quality for measuring this relationship is quite novel.  
39 Second, we addressed substantial parts of potential endogeneity by including a rich set of patient- and  
40 hospital-related control variables. Thereby, we specifically consider physician staffing and investigate to  
41 which degree physician staffing is a relevant predictor of patient-perceived quality of nursing care. In  
42 addition, we apply a fixed effects model to account for differences across hospital unit types, which  
43 seems important to reduce endogeneity problems. Finally, we allow for non-linear effects of nurse  
44 staffing on quality of nursing care and conduct sub-group analyses on patient case severity, hospital size,  
45 and medical versus surgical hospital units.  
46  
47  
48  
49  
50  
51  
52  
53  
54  
55  
56  
57  
58  
59  
60

## METHODS

### Data and sample

This study is part of a larger project on the association between nurse staffing and quality of care.[3, 42, 43] Our study analyzed data from an online patient survey. To ensure the quality of the survey, we followed the scientific standards for scale development. The entire development and validation of the survey is described elsewhere [43]. To sum up our proceeding, we drew on a systematic literature search and expert interviews to derive our initial items. We conducted two pre-tests (one paper and pencil pre-test and one online pre-test) with different participants and collected, discussed, and reported all changes made to the survey. After data collection, we performed comprehensive exploratory and confirmatory factor analyses to ensure the validity and reliability of the survey. We combined the survey data with (a) claims data provided by the largest statutory health insurance fund in Germany and (b) data from the mandatory quality reports published annually by each hospital in the country. The combined data set comprised data from patients discharged from non-pediatric, non-intensive, and non-psychiatric hospital units between January and October 2019. We define a hospital unit as an operating unit within a hospital that focuses on specific types of patients (e.g., geriatrics or cardiology). Our sample included only those patients who stayed at least two nights in the hospital. We contacted patients in monthly waves and asked them to participate in the survey, eight weeks after they had been discharged from the hospital at the latest. The survey contained questions related to patients' perceptions of the quality of the nursing care provided during their hospital stay. Each patient was contacted only once. In total, we contacted 212,554 patients, of whom 30,174 responded, yielding a response rate of 14.2%. The response rate is comparable to other large-scale patient surveys. We checked for representativeness of the study population. Compared to the general population of hospitalized patients in Germany, our sample is generally representative in observable characteristics. Only the share of patients older than 80 is lower in our sample compared to the general population of hospitalized patients in Germany. We also compared respondents to non-respondents and did not find any substantial deviations in observable characteristics.

The claims data in our data set contained patient-level information about the course of disease during each patient's hospital stay, as well as the dates of hospital admission and discharge, the type of hospital unit, and ICD codes. The quality reports contained general information at the hospital unit level, such as the number of patient cases treated and staffing numbers that relate to the situation at the end of 2017.

## Nurse staffing

We obtained the nurse staffing level in each hospital unit by calculating a patient-to-nurse ratio (PTN) in line with the definition for measuring nursing workload as suggested by the National Office of Statistics in Germany.[44] The patient-to-nurse ratio indicates how many patients a nurse has to care for during an average shift and is given by:

$$PTN = \frac{\text{occupation days} * 24\text{hours}}{\text{nurses} * 220\text{days} * 8\text{hours}}, \text{ with}$$

$$\text{occupation days} = \text{inpatient} * \text{average length of stay}.$$

The total number of nurses (based on full-time nurses employed) comprise all registered nurses with at least three years of training and assistant nurses with at least one year of training. The numbers are derived from the annual quality reports of each hospital, representing the situation at the end of the year and not accounting for sickness absences or other sources of within-year variations such as variation caused by holidays. To calculate occupation days, we used the number of inpatients and approximated the average length of stay of each hospital unit based on the average length of stay of more than 6.2 million inpatient cases available in our claims data set over the period 2014 to 2019. We draw on the five-year period for this approximation because we cannot observe all patients in each hospital unit in one year; to ensure robustness, we considered only those hospital units with more than 150 observations to approximate the length of stay.

In addition to staffing levels, we accounted for the skill mix in each hospital unit by calculating the ratio of assistant nurses to the total number of nurses (measured in full-time equivalents):

$$\text{skill mix} = \frac{\text{assistant nurses}}{\text{nurses}}.$$

We excluded extreme values, i.e., patient-to-nurse ratios below 1 and above 20, as well as skill-mix ratios above 25%.

## Quality of nursing care

Because the definition of nursing care varies from country to country, it is necessary to use an instrument that takes country-specific regulations into account. We therefore chose the Patients' Experience of Nursing Quality in Acute Hospitals (PENQuAH) instrument developed by Blume to analyze the relationship between nurse staffing and patient outcomes.[43] The instrument was designed to evaluate patients' perceptions of quality of nursing care in German hospitals. The instrument consists of



24 items, which were chosen based on a review of the literature and interviews with nursing experts. To examine the scale's dimensionality and factor-based validity, Blume conducted exploratory and confirmatory factor analyses with a randomly split sample.[43] Their exploratory factor analysis revealed that three main dimensions captured the structure of the underlying item set: general nursing care, guidance provided by nurses, and nurse-related patient loyalty to the hospital. The results of their confirmatory factor analysis suggested a good overall model fit (CFI = 0.978; TLI = 0.976). Table 1 shows the three dimensions and exemplary related items.

--- include table 1 about here ---

We calculated each dimension of quality of nursing care by taking the arithmetic mean of the underlying items after recoding reverse-coded items. Dimensions one and two are on a scale of one to five, with five representing the best quality of nursing care, and dimension three is on a scale of one to four, with four representing the best quality of nursing care. Dimension one represents patients' perception of the general quality of nursing care. Dimension two represents patients' perception of the guidance provided by nurses. Dimension three comprises two items that capture patients' loyalty to a hospital based on the nursing care provided.

### Statistical model

The results of previous studies suggest that the relationship between nurse staffing and patient outcomes varies across different types of hospital units.[8, 35, 42] To account more accurately for potential differences across the 24 unit types in our sample and to depict potential heteroscedastic structures in the error term of the regression, we applied a fixed effects model. The model is given by:

$$QoNC_{iu}^{(x)} = \alpha_0 + \alpha_{10} P\widetilde{T}N_{iu} + \alpha_{11} P\widetilde{T}N_{iu}^2 + \alpha_2 s\widetilde{k}ill_{iu} + \beta_1 \overline{PTN}_u + \beta_2 \overline{s\widetilde{k}ill}_u + \gamma C_{iu} + (v_{0u} + \varepsilon_{iu}),$$

where  $QoNC_{iu}^{(x)}$  is the value of one of the three factors  $x \in \{1, 2, 3\}$  for patient  $i$  admitted to unit type  $u$ ,  $u \in \{1, \dots, 24\}$ .  $\alpha_0$  is the intercept of the regression.  $P\widetilde{T}N_{iu} = (PTN_{iu} - \overline{PTN}_u)$  and  $s\widetilde{k}ill_{iu} = (skill_{iu} - \overline{s\widetilde{k}ill}_u)$  with coefficients  $\alpha_{10}$  and  $\alpha_0$  are the mean-centered independent nurse staffing variables of interest, which correspond to the patient-to-nurse and skill mix ratio of the hospital unit associated with patient  $i$  minus the group means  $\overline{PTN}_u$  and  $\overline{s\widetilde{k}ill}_u$  for each unit type  $u$ . Assuming that the marginal effect of the patient-to-nurse ratio on quality of nursing care decreases as staffing levels increase, we also

1  
2  
3 included a squared patient-to-nurse term with coefficient  $\alpha_{11}$ .  $\beta_1$  and  $\beta_2$  are the coefficients of the  
4 between-unit effects.  $C_{iu}$  represents a vector of patient-, hospital-, and hospital-unit-related control  
5 variables at level one of the model. First, it includes the patient-to-physician (PTP) ratio, because it might  
6 correlate with the PTN ratio and also affect the outcome.[e.g., 27] Second, we account for in patient  
7 risks by including age, gender, and each patient's case severity reflected by the Patient Clinical  
8 Complexity Level (PCCL) index (0-6), which indicates the degree of comorbidities and complications for  
9 each patient. It is derived from a closed list of comorbidities and complications and is meant to predict a  
10 patient's need for hospital resources, such as nursing care.[45] We directly incorporate the PCCL index in  
11 our model because sensitivity analyses using dummy variables for each score suggested a linear  
12 relationship. Furthermore, we control for the rurality of each patient's place of residence using an index  
13 ranging from one (urban area) to four (rural area), hospital size categories, and monthly fixed effects.  $v_{0u}$   
14 refers to the fixed effects for the 24 hospital unit types.

23  
24 As most previous studies used dichotomized outcome variables, we transformed our three quality of  
25 nursing care measures into dichotomous outcome variables and estimated a generalized version of our  
26 fixed effects model using a logit link function for comparability purposes, i.e. a logit model. To check the  
27 robustness of our main model, we estimated a random effects model. Lastly, replaced the Patient Clinical  
28 Complexity Level index with the Elixhauser comorbidity categories.[46]

32  
33 Moreover, we conducted subgroup analyses. As suggested by previous studies, the association between  
34 nurse staffing and patient outcomes can differ depending on patients' case severity.[8, 40] To study  
35 these potential differences, we split our sample into patients with low case severity (Patient Clinical  
36 Complexity Level = 0) and those with high case severity (Patient Clinical Complexity Level > 0) and  
37 estimated our main regression model for each of the sub-samples. Additionally, we considered that our  
38 results might vary due to differences in hospital size.[6, 41] We therefore split our sample into two  
39 categories – i.e., patients admitted to hospitals with fewer than 500 beds (category “small”) and patients  
40 admitted to hospitals with at least 500 beds (category “large”). Lastly, by categorizing our unit types as  
41 medical or surgical, we estimated our statistical model separately for medical and surgical patients.

## 48 49 Patient and Public Involvement

50 This study is part of a larger project on the association between nurse staffing and quality of care.[3, 42,  
51 43] The public, i.e., a statutory health insurance, hospital managers, and patient representatives were  
52 involved in the design of the overall project. In addition, patients, practitioners (nurses, physiotherapists,  
53 doctors), and scientific experts were involved in the development of the survey (described in more detail  
54  
55  
56  
57

1  
2  
3 in [3, 43]). Results of the study and the overall project will be disseminated to the participants via the  
4 statutory health insurance and via additional practice-oriented publications and newsletters.  
5  
6  
7

## 8 RESULTS

### 9 Descriptive results

10 After excluding extreme values for our nurse staffing variables and removing observations with missing  
11 values for one or more of the control variables, our final sample comprised 28,136 patients ranging from  
12 18 to 97 years of age (average: 61.12 years) who had been discharged from 3,458 distinct hospital units  
13 in 1,017 hospitals. 39.2% of the survey participants were female. Table 2 illustrates the distribution of  
14 patients and the average response for each of the three dimensions of quality of nursing care across the  
15 24 types of hospital units. Overall, the variation in the distribution of patients across the 24 unit types  
16 was large. Almost 50% of the patients had been discharged from general surgery or internal medicine,  
17 followed by orthopedics, urology, neurology, trauma surgery, and cardiology, from each of which  
18 between six and ten percent of the patients had been discharged. All of the other unit types each  
19 accounted for less than three percent of the patients in our sample. In terms of our dependent variable,  
20 quality of nursing care, we obtained an average response of 4.33, 3.77, and 3.38 for the three  
21 dimensions general nursing care, guidance provided by nurses, and nurse-related patient loyalty to the  
22 hospital, respectively, indicating that the perceived quality of nursing care was above the scale average  
23 for each. In addition, we found that patient perception of the guidance provided by nurses was, on  
24 average, 0.56 scale points lower compared to the general perception of quality of nursing care. We also  
25 found that the average responses varied across hospital unit types. For instance, for dimensions one and  
26 two, the average responses for patients discharged from internal medicine were 0.24 and 0.46 scale  
27 points lower, respectively, compared to orthopedic patients.  
28  
29  
30  
31  
32  
33  
34  
35  
36  
37  
38  
39  
40  
41  
42

43 For the patient-to-nurse and skill-mix-ratios, we obtained average values of 5.84 patients per nurse and  
44 6.61%, respectively. The patient-to-nurse ratio ranged from 3.77 patients a nurse has to care for in heart  
45 surgery to 9.75 in rheumatology. The skill-mix ratio ranged from 3.33% assistant nurses in nuclear  
46 medicine to 13.59% assistant nurses in endocrinology (see table A.1).  
47  
48  
49  
50  
51  
52

53 ---- include table 2 about here ----  
54  
55  
56  
57  
58  
59  
60

## Regression results

As shown in Table 3, our results indicate that the two nurse staffing variables were significantly related to quality of nursing care. An increase in the patient-to-nurse ratio significantly decreased the general quality of nursing care, the patient perception of nursing guidance, and nurse-related patient loyalty to a given hospital. Additionally, there were significantly positive associations between the squared patient-to-nurse ratio, on the one hand, and the general quality of nursing care, guidance, and patient loyalty, on the other. Hence, the negative effect of the patient-to-nurse ratio is greater when the patient-to-nurse ratio is smaller (in other words, if a nurse already has to care for a lot of patients, one additional patient has a less strong effect on quality perceptions). We illustrate the non-linear relationship in figure A.2 (for factor 1).

With regard to the skill-mix ratio, we found that an increase in the ratio of assistant nurses to the total number of nurses led to a significant decrease in general quality of nursing care, patient perception of nursing guidance, and patient loyalty. An increase in the patient-to-physician ratio of one additional patient a physician must care for significantly decreased the quality of nursing care dimensions.

---- include table 3 about here ----

The adjusted  $R^2$  measure indicated that our model reduces the error in predicting an individual outcome for our three dimensions of quality of nursing care by between 4.5 and 6.1%.

The regression results of the logit model indicated that an additional patient per nurse decreases the odds of a patient reporting high quality of nursing care. For nurse-related patient loyalty, this effect is significantly non-linear in the same way as in our main model (stated above). Increasing the share of assistant nurses decreases the odds of reporting high quality. An additional patient per physician does not significantly decrease the odds of reporting a high quality of quality of nursing care (see table A.3).

When we estimated a random effects model (table A.4) and when we replaced the Patient Clinical Complexity Level index with the Elixhauser risk adjustment, our results remained robust.

## Sub group analyses

Differentiating between patients according to their case severity, we found that the mean-centered patient-to-nurse ratio and its square are significantly associated with all three dimensions of patient-

1  
2  
3 perceived quality of nursing care for patients with low case severity, but not for those with high case  
4 severity. The effects of the skill-mix ratio are also only significant for patients with low case severity,  
5 while the effects of the patient-to-physician ratio are slightly larger and only significant for high-case  
6 severity patients (except for general nursing care) (see table A.5).  
7  
8  
9

10 When splitting our sample into patients admitted to a hospital with fewer than 500 beds and those  
11 admitted to a hospital with at least 500 beds, we found that an increase in the patient-to-nurse ratio  
12 significantly decreased general nursing care and nurse-related patient loyalty only for patients admitted  
13 to hospitals with fewer than 500 beds. Skill mix significantly affected general nursing care perceptions  
14 and nurse-related patient loyalty in small hospitals only, while it significantly affected the perception of  
15 guidance provided by nurses in small and in large hospitals. Moreover, we found a significant association  
16 between physician staffing and patient-perceived quality of nursing care for patients admitted to larger  
17 hospitals but not for patients admitted to smaller ones (see table A.6).  
18  
19  
20  
21  
22  
23

24 Finally, when we divided patients into those admitted to medical or surgical units, we found that the  
25 patient-to-nurse ratio significantly affected perceptions of guidance by nurses and nurse-related patient  
26 loyalty for medical patients only. The associations between the skill mix ratio and quality of nursing care  
27 seem largely unaffected by the sample split. Finally, it shows that medical patients were more sensitive  
28 to physician staffing compared to surgical patients (see table A.7).  
29  
30  
31  
32  
33

## 34 DISCUSSION

35 Our results provide important new insights into the relationship between nurse staffing and patient  
36 outcomes, in particular, patient-perceived quality of nursing care. We found that patient-perceived  
37 quality of nursing care significantly decreased as staffing levels, measured using the patient-to-nurse  
38 ratio, decreased. This finding is in line with previous research that has examined the relationship  
39 between nurse staffing levels and general perceived quality of care measures.[15, 16, 19–22, 25, 26, 47–  
40 49] Our study adds to the previously ambiguous evidence in literature by providing insights into the  
41 specific aspects of perceived quality of nursing care that are affected by staffing levels. Evidence on the  
42 perceived quality of guidance provided by nurses has been inconsistent and scarce.[20, 22] Our results,  
43 however, corroborate and extend the findings of Zhu et al. ,[22] who found that higher staffing levels  
44 improved satisfaction with nurses' guidance on medications and medical aids, pain management, and  
45 self-help.[22] With respect to nurse-related patient loyalty, our results confirm the findings of previous  
46 studies that have found that higher nurse staffing levels in hospitals increase the likelihood of patients  
47 generally recommending a hospital to family and friends.[20, 21] Thus, nurse-related patient loyalty  
48  
49  
50  
51  
52  
53  
54  
55  
56  
57  
58  
59  
60

1  
2  
3 seems to be highly related to overall recommendation behavior. In sum, staffing levels affect whether an  
4 adequate amount of time is devoted to caring and providing instructions as well as nurses'  
5 responsiveness to patients' individual needs. Furthermore, nurse staffing levels have direct  
6 consequences for hospitals in terms of patient loyalty. Yet, those effects are not linear; instead, the  
7 negative effects become smaller with rising numbers of patients per nurse. This decreasing marginal  
8 effect of the patient-to-nurse ratio on quality of nursing care with increasing staffing levels is in line with  
9 prior research [15] and seems reasonable: when the ratio is small, each additional patient will  
10 substantially affect the amount of time and the responsiveness of a nurse, thus probably substantially  
11 reducing missed care.[11–13] In contrast, the effect will be lower when a nurse already needs to care for  
12 a high number of (potentially less complex) patients and each additional patient only has a low impact.

13  
14 Our results suggest that the nurses' level of educational attainment, as measured using the skill-mix  
15 ratio, significantly influences patient-perceived quality of nursing care. This finding adds to the few  
16 available studies on the relationship between skill mix and patient-perceived quality of care.[15, 18, 19]  
17 We found strong evidence that a higher proportion of assistant nurses, which means a lower proportion  
18 of professionalization among nursing staff, is negatively associated with all three dimensions of quality of  
19 nursing care. Nurses with lower levels of educational attainment may have less training in interacting  
20 with patients, might work less efficiently and hence have less time per patient, or both. In addition, it is  
21 conceivable that they are less experienced in providing instructions suited to a patient's particular needs  
22 – for example, with regard to medication, pain relief, or the use of medical aids. Any of these factors  
23 could lead to negative perceptions among patients of quality of nursing care and potentially also to an  
24 increased number of adverse events.[8, 17, 50]

25  
26 We found that one additional patient per physician significantly reduced all three dimensions of patient-  
27 perceived quality of nursing care. This is in line with the findings of e.g. West et al.,[51] who found that  
28 both physician and nurse staffing impact intensive care unit patient mortality . However, we found that  
29 the effect sizes for physician staffing were less pronounced compared to those for nurse staffing levels,  
30 indicating that our instrument is more closely related to nurse staffing than to physician staffing. This  
31 result might indicate that patients are not fully capable of differentiating between different occupational  
32 groups when assessing quality of care in hospitals. Another explanation might be that physician staffing  
33 does in fact have an impact on quality of nursing care; if physicians have to care for a large number of  
34 patients, they might omit passing on information which nurses need to adequately care for a patient –  
35 e.g., information on the patients' needs or patient-specific treatment instructions. Additionally, stressed  
36  
37  
38  
39  
40  
41  
42  
43  
44  
45  
46  
47  
48  
49  
50  
51  
52  
53  
54  
55  
56  
57  
58  
59  
60

1  
2  
3 physicians might cause a bad civility climate, which in turn negatively impacts nurses' civility towards  
4 patients.[52, 53]

6  
7 The significant association we observed between the patient-to-nurse ratio and patient-perceived quality  
8 of nursing care was driven mainly by low-severity patients. This stands in contrast to the study of West et  
9 al.,[51] which found that reductions in mortality risks from having more intensive care unit nurses is  
10 larger for patients who are the most severely ill. This might indicate that the effect of nurse staffing  
11 differs across hospital units (in particular, intensive versus non-intensive care) and/or across outcomes  
12 (in that case, patient-perceived quality of care and mortality). Additionally, for low-severity patients, the  
13 share of assistant nurses affects their perceptions of quality of nursing care, while for high-severity  
14 patients, the patient-to-physician ratio affects their perceptions of quality of nursing care. Because high-  
15 severity patients are more dependent on various health professionals and their collaborative  
16 performance, the quality of cooperation and consistency within and across occupational groups might  
17 explain their perceptions of quality of nursing care rather than staffing levels and skill mix.[53] Low-  
18 severity patients might be less relying on different professionals, so that the composition of the nurses,  
19 as expressed in their skill mix, is of greater relevance to them.

20  
21 Similarly, splitting our sample using two separate bed categories reveals that an increase in the patient-  
22 to-nurse ratio decreases patient-perceived quality of nursing care among patients admitted to hospitals  
23 with fewer than 500 beds rather than for patients admitted to hospitals with at least 500 beds. Yet, the  
24 patient-perceived guidance is only significantly affected by staffing levels in large hospitals (significant  
25 non-linear effect). While skill mix significantly affects patient-perceived general nursing care and loyalty  
26 in smaller hospitals only, it significantly relates to guidance in both small and large hospitals. Thus, we  
27 see some variation in how our variables of interest relate to the different quality of nursing care  
28 dimensions. The patient-to-physician ratio in turn only significantly affects patient-perceived quality of  
29 nursing care in large hospitals for all three quality of nursing care dimensions. This might be explained by  
30 a higher proportion of high-severity patients admitted to larger and potentially more highly specialized  
31 hospitals. In addition, in larger hospitals, collaboration across different occupational groups might be of  
32 higher importance than in smaller hospitals.

33  
34 The stronger statistical significance of the relationship between nurse and physician staffing levels and  
35 quality of nursing care for medical patients compared to surgical patients seems plausible, as well. For  
36 nurse staffing, the finding is in line with previous studies that have analyzed the relationship between  
37 nurse staffing levels and patient outcomes based on administrative data and found stronger associations

1  
2  
3 for medical patients.[8] The difference in effects might be explained by surgical patients being healthier  
4 (i.e., as a precondition for being eligible for surgery) and therefore being less dependent on nurses. For  
5 medical patients, the collaboration between professional groups might also be of higher relevance,  
6 which can explain the significant effects of physician staffing.  
7  
8  
9

10 Although our study makes important contributions to understanding the relationship between nurse  
11 staffing and patient outcomes, it is not without important limitations, each of which offers avenues for  
12 further research. First, both of the nurse staffing variables used in our analysis (i.e., patient-to-nurse and  
13 skill-mix ratios) represent annual averages and do not capture day-to-day variations in nurse staffing.  
14 Similarly, even though we were able to consider several variables which are likely related to nurse  
15 staffing and patient outcomes, we might have omitted variable bias from other hospital-unit-related  
16 characteristics, such as the availability and use of technology, the share of temporary or immigrant  
17 nurses, the team climate, or absences due to sickness. These variables were not available in our data  
18 sample but might be associated with nurses' workload and also have an effect on patient outcomes.[27,  
19 53] In addition, the model complexity and the limited sample size drove our choice to conduct subgroup  
20 instead of moderating analyses. Thus, although this study overcomes several endogeneity issues of  
21 previous studies it cannot claim to fully address them. While the large size of our sample may  
22 compensate for some of these issues, future studies may want to draw upon or collect more finely  
23 grained data covering day-to-day variations in nurse staffing variables and should try to account for  
24 further hospital characteristics. In addition, administrative staffing measures have been shown to deviate  
25 from perceived staffing adequacy;[54, 55] therefore, accounting for the latter in relation with quality of  
26 nursing care is a valuable avenue for further research, too. Another limitation this study shares with  
27 previous research is its cross-sectional nature. As the causal order and the generalizability of our results  
28 cannot be verified, future studies would be valuable to investigate the relationships in other settings and  
29 over time. Finally, the PENQuAH instrument has only been tested in Germany and our sample shows  
30 slight variations from the German hospitalized population, which might affect the generalizability of our  
31 results. As it has been able to provide more fine-grained insights into the dimensions of patient-  
32 perceived quality of nursing care, we recommend applying, adapting, and validating it to further data  
33 samples, and adjusting it to the hospital environments of other countries.  
34  
35  
36  
37  
38  
39  
40  
41  
42  
43  
44  
45  
46  
47  
48  
49  
50

51 Our results have important implications for hospital managers and health policy makers pursuing  
52 stronger patient orientation. By providing strong evidence that quality of nursing care is affected by  
53 nurse staffing, we show that nurse staffing decisions are critical for favorable patient care experiences.  
54 We find that in addition to staffing levels, nurses' skill mix is an important factor associated with quality  
55  
56  
57  
58  
59  
60



1  
2  
3  
4  
5  
6  
7  
8  
9  
10  
11  
12  
13  
14  
15  
16  
17  
18  
19  
20  
21  
22  
23  
24  
25  
26  
27  
28  
29  
30  
31  
32  
33  
34  
35  
36  
37  
38  
39  
40  
41  
42  
43  
44  
45  
46  
47  
48  
49  
50  
51  
52  
53  
54  
55  
56  
57  
58  
59  
60

of nursing care. Therefore, we recommend considering nurses' levels of educational attainment, qualifications and specializations when designing policies, such as minimum staffing regulations, to improve nurse staffing in hospitals.

For peer review only

## Tables

|     | Dimension                   | # Items | exemplary items                                                                                                                                                                                                                  | scale                |
|-----|-----------------------------|---------|----------------------------------------------------------------------------------------------------------------------------------------------------------------------------------------------------------------------------------|----------------------|
| (1) | general nursing care        | 13      | <ul style="list-style-type: none"> <li>From my perspective, I always received the necessary care in the hospital.</li> <li>Nursing staff treated me respectfully and courteously.</li> </ul>                                     | 1 (worst) – 5 (best) |
| (2) | guidance provided by nurses | 9       | <ul style="list-style-type: none"> <li>Nursing staff told or showed me how I may and should move.</li> <li>Nursing staff told or showed me how to use my medical aids.</li> </ul>                                                | 1 (worst) – 5 (best) |
| (3) | nurse-related loyalty       | 2       | <ul style="list-style-type: none"> <li>Thinking about the nursing staff, would you select the hospital again?</li> <li>Thinking about the nursing staff, would you recommend the hospital to your friends and family?</li> </ul> | 1 (worst) – 4 (best) |

**Table 1: Overview on dimensions of Patients' Experience of Nursing Quality in Acute Hospitals (PENQuAH) instrument**

| unit type         | Patients      | hospital units | (1) general nursing care <sup>1</sup> | (2) guidance <sup>2</sup> | (3) loyalty <sup>3</sup> |
|-------------------|---------------|----------------|---------------------------------------|---------------------------|--------------------------|
| Internal medicine | 6,260         | 732            | 4.22 (0.81)                           | 3.56 (1.19)               | 3.25 (0.84)              |
| Geriatrics        | 106           | 60             | 3.76 (1.05)                           | 3.34 (1.14)               | 2.90 (0.99)              |
| Cardiology        | 1,698         | 150            | 4.34 (0.74)                           | 3.71 (1.13)               | 3.37 (0.76)              |
| Nephrology        | 61            | 21             | 4.19 (0.85)                           | 3.62 (1.09)               | 3.27 (0.83)              |
| Hematology        | 181           | 66             | 4.37 (0.77)                           | 3.71 (1.17)               | 3.47 (0.73)              |
| Endocrinology     | 22            | 5              | 4.29 (0.70)                           | 3.65 (1.24)               | 3.27 (0.69)              |
| Gastroenterology  | 378           | 73             | 4.08 (0.90)                           | 3.37 (1.21)               | 3.13 (0.90)              |
| Pneumology        | 200           | 35             | 4.27 (0.81)                           | 3.70 (1.24)               | 3.39 (0.78)              |
| Rheumatology      | 121           | 14             | 4.34 (0.80)                           | 3.57 (1.25)               | 3.38 (0.79)              |
| Pulmonarymedicine | 77            | 12             | 4.36 (0.74)                           | 3.74 (1.20)               | 3.45 (0.70)              |
| Generalsurgery    | 7,512         | 771            | 4.37 (0.75)                           | 3.87 (1.07)               | 3.43 (0.75)              |
| Traumasurgery     | 1,784         | 234            | 4.26 (0.79)                           | 3.73 (1.10)               | 3.28 (0.81)              |
| Neurosurgery      | 582           | 104            | 4.28 (0.77)                           | 3.65 (1.10)               | 3.39 (0.79)              |
| Vascularsurgery   | 300           | 86             | 4.39 (0.75)                           | 3.87 (1.12)               | 3.45 (0.73)              |
| Plasticsurgery    | 186           | 45             | 4.31 (0.75)                           | 3.79 (1.15)               | 3.41 (0.78)              |
| Thoracicsurgery   | 81            | 22             | 4.47 (0.73)                           | 4.09 (1.04)               | 3.56 (0.73)              |
| Heartsurgery      | 319           | 54             | 4.36 (0.74)                           | 3.90 (0.96)               | 3.46 (0.72)              |
| Urology           | 2,396         | 295            | 4.44 (0.66)                           | 3.93 (1.03)               | 3.46 (0.70)              |
| Orthopedics       | 2,753         | 226            | 4.46 (0.68)                           | 4.02 (0.99)               | 3.57 (0.68)              |
| Neurology         | 1,951         | 275            | 4.28 (0.77)                           | 3.61 (1.17)               | 3.30 (0.80)              |
| Nuclearmedicine   | 103           | 36             | 4.56 (0.63)                           | 4.20 (0.94)               | 3.51 (0.71)              |
| Radiotherapy      | 53            | 23             | 4.49 (0.61)                           | 4.02 (0.88)               | 3.45 (0.70)              |
| Dermatology       | 760           | 63             | 4.40 (0.69)                           | 3.93 (1.06)               | 3.43 (0.73)              |
| Dentistry         | 252           | 56             | 4.12 (0.84)                           | 3.68 (1.11)               | 3.18 (0.88)              |
| <b>Total</b>      | <b>28,136</b> | <b>3,458</b>   | <b>4.33 (0.76)</b>                    | <b>3.77 (1.12)</b>        | <b>3.38 (0.78)</b>       |

**Table 2: Quality of nursing care across unit types**

<sup>1</sup> Mean response for general nursing care, measured on a scale of one to five, with five representing the best care. Standard deviation in parantheses.

<sup>2</sup> Mean response for guidance provided by nurses, measured on a measured on a scale of one to five, with five representing the best guidance.

<sup>3</sup> Mean response for patient loyalty to the hospital, measured on a scale of one to four, with four representing the highest loyalty.

| effect <sup>†</sup>       | (1) general nursing care           | (2) guidance                       | (3) loyalty                        |
|---------------------------|------------------------------------|------------------------------------|------------------------------------|
| $\widetilde{PTN}$         | -0.020 [0.002]<br>(-0.033;-0.008)  | -0.023 [0.018]<br>(-0.041;-0.004)  | -0.025 [<0.001]<br>(-0.038;-0.012) |
| $\widetilde{PTN}^2$       | 0.001 [0.003]<br>(0.000;0.002)     | 0.001 [0.030]<br>(0.000;0.002)     | 0.001 [0.002]<br>(0.000;0.002)     |
| $\widetilde{skill}$       | -0.003 [<0.001]<br>(-0.004;-0.001) | -0.005 [<0.001]<br>(-0.007;-0.003) | -0.003 [<0.001]<br>(-0.005;-0.002) |
| PCCL                      | -0.048 [<0.001]<br>(-0.057;-0.040) | -0.034 [<0.001]<br>(-0.047;-0.022) | -0.028 [<0.001]<br>(-0.037;-0.019) |
| age                       | 0.021 [<0.001]<br>(0.018;0.025)    | 0.018 [<0.001]<br>(0.013;0.023)    | 0.018 [<0.001]<br>(0.014;0.021)    |
| age <sup>2</sup>          | 0.000 [<0.001]<br>(0.000;0.000)    | 0.000 [<0.001]<br>(0.000;0.000)    | 0.000 [<0.001]<br>(0.000;0.000)    |
| gender<br>(= 1 if female) | -0.192 [<0.001]<br>(-0.210;-0.173) | -0.276 [<0.001]<br>(-0.303;-0.249) | -0.140 [<0.001]<br>(-0.159;-0.121) |
| rurality                  | 0.014 [0.004]<br>(0.004;0.024)     | 0.028 [<0.001]<br>(0.014;0.042)    | 0.004 [0.382]<br>(-0.005;0.014)    |
| $\widetilde{PTP}$         | -0.002 [0.030]<br>(-0.003;0.000)   | -0.002 [0.026]<br>(-0.005;0.000)   | -0.002 [0.013]<br>(-0.003;0.000)   |
| adj. R <sup>2</sup>       | <b>0.061</b>                       | <b>0.055</b>                       | <b>0.045</b>                       |
| observations              | <b>28,136</b>                      | <b>28,136</b>                      | <b>28,136</b>                      |

**Table 3: Regression results**

P-values in square brackets, 95%-confidence intervals in parentheses

Abbreviations:  $\widetilde{PTN}$ : mean-centered patient-to-nurse ratio;  $\widetilde{skill}$ : mean-centered skill-mix ratio; PCCL: Patient Clinical Complexity Level index;

$\widetilde{PTP}$ : mean-centered patient-to-physician ratio

†Fixed effects for unit types, months, and bed categories (50—299, 300—499, 500—749, and at least 750) and between-unit effects for patient-to-nurse and skill mix included but not shown.

## Funding

This material is based upon work supported by the Innovation Fund of the German Federal Joint Committee, P.O. Box 12 06 06, Berlin, Germany (01VSF17038).

## Competing/Conflicting interests

The authors declare that they have no competing or conflicting interests.

## Author statement

JS and VW have originally designed the study. KD and US have acquired and analyzed the data. JS, KD, and VW have interpreted the data. KD and VW have drafted the article and JS and US have critically revised it. All authors undertake to give final approval of the version to be published and agree to be accountable for all aspects of the work. No further writing assistance other than basic copy-editing has been provided.

## Ethical approval and informed consent

A declaration of compliance with terms of use and ethical standards from the University of Hamburg's WiSo Laboratories was obtained on January 15th, 2019 (no approval number provided). Information and consent of the survey participants were conducted in written form prior to survey participation. A copy of the written form of Informed Consent, Privacy and Confidentiality was handed out to the subjects. A further copy was provided for the archive of the WiSo Laboratories.

## Data availability statement

The data are in large parts owned by a German statutory health insurer, the Techniker Krankenkasse. To fulfill the legal requirements to obtain the data, researchers must obtain permission for a specific research question from the German Federal (Social) Insurance Office. Additionally, researchers must conclude a contract with the statutory health insurer regarding data access.

## REFERENCES

- 1 Kane RL, Shamliyan TA, Mueller C, et al. The association of registered nurse staffing levels and patient outcomes. *Med Care* 2007;45(12):1195–204.
- 2 Driscoll A, Grant MJ, Carroll D, et al. The effect of nurse-to-patient ratios on nurse-sensitive patient outcomes in acute specialist units: A systematic review and meta-analysis. *Eur J Cardiovasc Nurs* 2018;17(1):6–22.
- 3 Blume K, Dietermann K, Kirchner-Heklau U, et al. Staffing levels and nurse sensitive patient outcomes: Umbrella review and qualitative study. *Health Serv Res* 2021;00:1-23. DOI: 10.1111/1475-6773.13647.
- 4 Cook A, Gaynor M, Stephens M, et al. The effect of a hospital nurse staffing mandate on patient health outcomes: Evidence from California's minimum staffing regulation. *J Health Econ* 2012;31(2):340–48.
- 5 Blegen MA, Goode CJ, Spetz J, et al. Nurse staffing effects on patient outcomes: safety-net and non-safety-net hospitals. *Med Care* 2011;49(4):406–14.
- 6 Aiken LH, Clarke SP, Sloane DM, et al. Hospital nurse staffing and patient mortality, nurse burnout, and job dissatisfaction. *JAMA* 2002;288(16):1987–93.
- 7 Needleman J, Buerhaus P, Pankratz VS, et al. Nurse staffing and inpatient hospital mortality. *N Engl J Med* 2011;364(11):1037–45.
- 8 Needleman J, Buerhaus P, Mattke S, et al. Nurse-staffing levels and the quality of care in hospitals. *N Engl J Med* 2002;346(22):1715–22.
- 9 Stalpers D, De Brouwer BJ, Kaljouw MJ, et al. Associations between characteristics of the nurse work environment and five nurse-sensitive patient outcomes in hospitals: a systematic review of literature. *Int J Nurs Stud* 2015;52(4):817–35.
- 10 Leary A, Cook R, Jones S, et al. Mining routinely collected acute data to reveal non-linear relationships between nurse staffing levels and outcomes. *BMJ Open* 2016;6(12):e011177. doi:10.1136/bmjopen-2016-011177 [published Online First: 16 December 2016].
- 11 Aiken LH, Sloane DM, Ball J, et al. Patient satisfaction with hospital care and nurses in England: an observational study. *BMJ Open* 2018;8(1):e019189.
- 12 Redfern OC, Griffiths P, Maruotti A, et al. The association between nurse staffing levels and the timeliness of vital signs monitoring: a retrospective observational study in the UK. *BMJ Open* 2019;9(9):e032157.
- 13 Kalisch BJ, Tschannen D, Lee KH. Missed nursing care, staffing, and patient falls. *J Nurs Care Qual* 2012;27(1):6–12.
- 14 Rittenhouse DR, Shortell SM, Fisher ES. Primary care and accountable care—two essential elements of delivery-system reform. *New England Journal of Medicine* 2009;361(24):2301–03.
- 15 Opiel E-M, Young GJ. Nurse Staffing Patterns and Patient Experience of Care: An Empirical Analysis of U.S. Hospitals. *Health Serv Res* 2018;53(3):1799–818.
- 16 Martsof GR, Gibson TB, Benevent R, et al. An Examination of Hospital Nurse Staffing and Patient Experience with Care: Differences between Cross-Sectional and Longitudinal Estimates. *Health Serv Res* 2016;51(6):2221–41.
- 17 Aiken LH, Sloane D, Griffiths P, et al. Nursing skill mix in European hospitals: cross-sectional study of the association with mortality, patient ratings, and quality of care. *BMJ Qual Saf* 2017;26(7):559–68.

- 1  
2  
3 18 Hall LM, Doran D, Baker GR, et al. Nurse Staffing Models as Predictors of Patient Outcomes. *Med Care*  
4 2003.  
5  
6 19 Potter P, Barr N, McSweeney M, et al. Identifying nurse staffing and patient outcome relationships: a  
7 guide for change in care delivery. *Nurs Econ* 2003;21(4):158–66.  
8  
9 20 Kutney-Lee A, McHugh MD, Sloane DM, et al. Nursing: a key to patient satisfaction. *Health Aff.*  
10 2009;28(4):w669-77.  
11  
12 21 Aiken LH, Sermeus W, van den Heede K, et al. Patient safety, satisfaction, and quality of hospital care:  
13 cross sectional surveys of nurses and patients in 12 countries in Europe and the United States. *BMJ*  
14 2012;344:e1717.  
15  
16 22 Zhu XW, You LM, Zheng J, et al. Nurse staffing levels make a difference on patient outcomes: a  
17 multisite study in Chinese hospitals. *J Nurs Scholarsh* 2012;44(3):266–73.  
18  
19 23 Papastavrou E, Efstathiou G, Charalambous A. Nurses' and patients' perceptions of caring behaviours:  
20 quantitative systematic review of comparative studies. *J Adv Nurs* 2011;67(6):1191–205.  
21  
22 24 Ausserhofer D, Schubert M, Desmedt M, et al. The association of patient safety climate and nurse-  
23 related organizational factors with selected patient outcomes: a cross-sectional survey. *Int J Nurs*  
24 *Stud* 2013;50(2):240–52.  
25  
26 25 Ball JE, Murrells T, Rafferty AM, et al. 'Care left undone' during nursing shifts: associations with  
27 workload and perceived quality of care. *BMJ Qual Saf* 2014;23(2):116–25.  
28  
29 26 Cho S-H, Mark BA, Knaf G, et al. Relationships between nurse staffing and patients' experiences, and  
30 the mediating effects of missed nursing care. *J Nurs Scholarsh* 2017;49(3):347–55.  
31  
32 27 Griffiths P, Ball J, Drennan J, et al. Nurse staffing and patient outcomes: strengths and limitations of  
33 the evidence to inform policy and practice. A review and discussion paper based on evidence  
34 reviewed for the National Institute for Health and Care Excellence Safe Staffing guideline  
35 development. *Int J Nurs Stud* 2016;63:213–25.  
36  
37 28 Cho SH, Ketefian S, Barkauskas VH, et al. The effects of nurse staffing on adverse events, morbidity,  
38 mortality, and medical costs. *Nurs Res* 2003;52(2):71–79.  
39  
40 29 Kim CG, Bae KS. Relationship between nurse staffing level and adult nursing-sensitive outcomes in  
41 tertiary hospitals of Korea: retrospective observational study. *Int J Nurs Stud* 2018;80:155–64.  
42  
43 30 Weiss ME, Yakusheva O, Bobay KL. Quality and cost analysis of nurse staffing, discharge preparation,  
44 and postdischarge utilization. *Health Serv Res* 2011;46(5):1473–94.  
45  
46 31 Twigg DE, Duffield C, Bremner A, et al. The impact of the nursing hours per patient day (NHPPD)  
47 staffing method on patient outcomes: a retrospective analysis of patient and staffing data. *Int J*  
48 *Nurs Stud* 2011;48(5):540–48.  
49  
50 32 Yakusheva O, Lindrooth R, Weiss M. Economic Evaluation of the 80% Baccalaureate Nurse Workforce  
51 Recommendation: A Patient-level Analysis. *Olga Yakusheva, Richard Lindrooth and Marianne Weiss*  
52 *Medical Care* 2014;52(10):864–69.  
53  
54 33 Keers RN, Williams SD, Cooke J, et al. Understanding the causes of intravenous medication  
55 administration errors in hospitals: a qualitative critical incident study. *BMJ Open*  
56 2015;5(3):e005948.  
57  
58 34 Lake ET, Shang J, Klaus S, et al. Patient falls: association with hospital Magnet status and nursing unit  
59 staffing. *Res Nurs Health* 2010;33(5):413–25.  
60  
35 Dunton N, Gajewski B, Taunton RL, et al. Nurse staffing and patient falls on acute care hospital units.  
*Nurs Outlook* 2004;52(1):53–59.  
36 Duffield C, Diers D, O'Brien-Pallas L, et al. Nursing staffing, nursing workload, the work environment  
and patient outcomes. *Appl Nurs Res* 2011;24(4):244–55.

- 1  
2  
3 37 van den Heede K, Lesaffre E, Diya L, et al. The relationship between inpatient cardiac surgery  
4 mortality and nurse numbers and educational level: analysis of administrative data. *Int J Nurs Stud*  
5 2009b;46(6):796–803.  
6  
7 38 Sales A, Sharp N, Li YF, et al. The association between nursing factors and patient mortality in the  
8 Veterans Health Administration: the view from the nursing unit level. *Med Care* 2008;46(9):938–45.  
9 39 Brubakk K, Svendsen MV, Hofoss D, et al. Associations between work satisfaction, engagement and 7-  
10 day patient mortality: a cross-sectional survey. *BMJ Open* 2019;9(12):e031704.  
11 40 Diya L, van den Heede K, Sermeus W, et al. The relationship between in-hospital mortality,  
12 readmission into the intensive care nursing unit and/or operating theatre and nurse staffing levels.  
13 *J Adv Nurs* 2012;68(5):1073–81.  
14 41 Rafferty AM, Clarke SP, Coles J, et al. Outcomes of variation in hospital nurse staffing in English  
15 hospitals: cross-sectional analysis of survey data and discharge records. *Int J Nurs Stud*  
16 2007;44(2):175–82.  
17 42 Dietermann K, Winter V, Schneider U, et al. The impact of nurse staffing levels on nursing-sensitive  
18 patient outcomes: A multilevel regression approach. *European Journal of Health Economics*  
19 2021;online first. DOI: 10.1007/s10198-021-01292-2.  
20 43 Blume K, Kirchner-Heklau U, Winter V, et al. Construction and validation of a scale to measure the  
21 quality of nurse delivered care in acute care settings. *Working Paper* 2021.  
22 44 National Office of Statistics. Gesundheit: Grunddaten der Krankenhäuser 2017 (Basic data of hospitals  
23 of the year 2017). Wiesbaden: Statistisches Bundesamt (Destatis) 2018.  
24 45 InEK GmbH. G-DRG German diagnosis related groups: Version 2019. Definitionshandbuch, Band 5,  
25 Anhang C. Siegburg 2018.  
26 46 Elixhauser A, Steiner C, Harris DR, et al. Comorbidity measures for use with administrative data. *Med*  
27 *Care* 1998;36(1):8–27.  
28 47 Cho SH, Yun SC. Bed-to-nurse ratios, provision of basic nursing care, and in-hospital and 30-day  
29 mortality among acute stroke patients admitted to an intensive care unit: cross-sectional analysis  
30 of survey and administrative data. *Int J Nurs Stud* 2009;46(8):1092–101.  
31 48 O'Brien-Pallas L, Li XM, Wang S, et al. Evaluation of a patient care delivery model: system outcomes in  
32 acute cardiac care. *Can J Nurs Res* 2010;42(4):98–120.  
33 49 Sochalski J. Is more better?: the relationship between nurse staffing and the quality of nursing care in  
34 hospitals. *Med Care* 2004;42:II67-II73.  
35 50 Needleman J, Buerhaus PI, Stewart M, et al. Nurse staffing in hospitals: is there a business case for  
36 quality? *Health Aff.* 2006;25(1):204–11.  
37 51 West E, Barron DN, Harrison D, et al. Nurse staffing, medical staffing and mortality in intensive care:  
38 an observational study. *Int J Nurs Stud* 2014;51(5):781–94.  
39 52 Oppel E-M, Mohr DC. "Paying it forward": The link between providers' civility climate, civility toward  
40 patients and patient experience outcomes. *Health Care Manage Rev* 2020;45(2):141–50.  
41 53 van Bogaert P, Timmermans O, Weeks SM, et al. Nursing unit teams matter: impact of unit-level nurse  
42 practice environment, nurse work characteristics, and burnout on nurse reported job outcomes,  
43 and quality of care, and patient adverse events—a cross-sectional survey. *Int J Nurs Stud*  
44 2014;51(8):1123–34.  
45 54 Choi J, Staggs VS. Comparability of nurse staffing measures in examining the relationship between RN  
46 staffing and unit-acquired pressure ulcers: a unit-level descriptive, correlational study. *Int J Nurs*  
47 *Stud* 2014;51(10):1344–52.  
48  
49  
50  
51  
52  
53  
54  
55  
56  
57  
58  
59  
60

1  
2  
3 55 Winter V, Schreyögg J, Thiel A. Hospital staff shortages: Environmental and organizational  
4 determinants and implications for patient satisfaction. *Health Policy* 2020;124(4):380–88.  
5  
6  
7  
8  
9  
10  
11  
12  
13  
14  
15  
16  
17  
18  
19  
20  
21  
22  
23  
24  
25  
26  
27  
28  
29  
30  
31  
32  
33  
34  
35  
36  
37  
38  
39  
40  
41  
42  
43  
44  
45  
46  
47  
48  
49  
50  
51  
52  
53  
54  
55  
56  
57  
58  
59  
60

For peer review only



## Appendix: Nurse staffing and patient-perceived quality of nursing care: A cross-sectional analysis of survey and administrative data in German hospitals

### A.1: Mean PTN ratio and skill mix ratio per unit type

| unit type          | patients      | patient-to nurse ratio (mean) | skill mix ratio (mean) |
|--------------------|---------------|-------------------------------|------------------------|
| internal medicine  | 6,260         | 5.92                          | 7.54                   |
| geriatrics         | 106           | 8.75                          | 11.91                  |
| cardiology         | 1,698         | 4.68                          | 5.85                   |
| nephrology         | 61            | 4.78                          | 4.70                   |
| hematology         | 181           | 5.31                          | 5.56                   |
| endocrinology      | 22            | 8.41                          | 13.59                  |
| gastroenterology   | 378           | 6.20                          | 8.30                   |
| pneumology         | 200           | 4.91                          | 7.68                   |
| rheumatology       | 121           | 9.75                          | 9.71                   |
| pulmonary medicine | 77            | 6.16                          | 6.14                   |
| general surgery    | 7,512         | 5.87                          | 6.59                   |
| trauma surgery     | 1,784         | 6.50                          | 7.14                   |
| neurosurgery       | 582           | 5.90                          | 5.64                   |
| vascular surgery   | 300           | 5.76                          | 4.98                   |
| plastic surgery    | 186           | 5.01                          | 4.30                   |
| thoracic surgery   | 81            | 5.25                          | 6.44                   |
| heart surgery      | 319           | 3.77                          | 5.08                   |
| urology            | 2,396         | 6.27                          | 5.45                   |
| orthopedics        | 2,753         | 6.05                          | 6.94                   |
| neurology          | 1,951         | 5.36                          | 6.26                   |
| nuclear medicine   | 103           | 4.26                          | 3.33                   |
| radiotherapy       | 53            | 5.32                          | 5.27                   |
| dermatology        | 760           | 5.93                          | 4.87                   |
| dentistry          | 252           | 4.85                          | 4.41                   |
| <b>total</b>       | <b>28,136</b> | <b>5.84</b>                   | <b>6.61</b>            |

### A.2 Illustration: Effect of an additional patient per nurse on QoNC factor 1 (ceteris paribus)

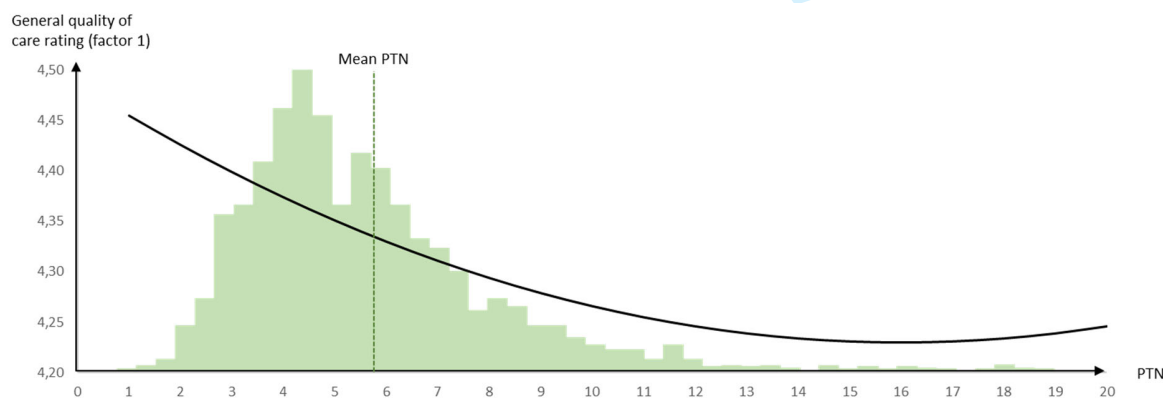

**Note:** the green area illustrates the distribution (histogram) of the PTN ratio and indicates the quantity of data points to substantiate the estimation depending on the PTN ratio.

Nurse staffing and patient-perceived quality of nursing care

A.3: Regression results generalized random intercept model (odds ratios)

| effect <sup>†</sup>       | (1) general nursing care            | (2) guidance                        | (3) loyalty                         |
|---------------------------|-------------------------------------|-------------------------------------|-------------------------------------|
| $\overline{PTN}$          | 0.951 [0.010]<br>(0.915;0.988)      | 0.943 [0.010]<br>(0.902;0.986)      | 0.929 [ $<0.001$ ]<br>(0.897;0.963) |
| $\overline{PTN}^2$        | 1.003 [0.035]<br>(1.000;1.005)      | 1.003 [0.035]<br>(1.001;1.006)      | 1.004 [0.001]<br>(1.002;1.006)      |
| $\overline{skill}$        | 0.995 [0.050]<br>(0.991;1.000)      | 0.997 [0.050]<br>(0.991;1.002)      | 0.991 [ $<0.001$ ]<br>(0.986;0.995) |
| PCCL                      | 0.876 [ $<0.001$ ]<br>(0.851;0.900) | 0.875 [ $<0.001$ ]<br>(0.846;0.906) | 0.944 [ $<0.001$ ]<br>(0.922;0.967) |
| age                       | 1.080 [ $<0.001$ ]<br>(1.066;1.094) | 1.061 [ $<0.001$ ]<br>(1.045;1.077) | 1.034 [ $<0.001$ ]<br>(1.024;1.045) |
| age <sup>2</sup>          | 0.999 [ $<0.001$ ]<br>(0.999;1.000) | 1.000 [ $<0.001$ ]<br>(0.999;1.000) | 1.000 [ $<0.001$ ]<br>(1.000;1.000) |
| gender<br>(= 1 if female) | 0.903 [ $<0.001$ ]<br>(0.854;0.955) | 0.934 [ $<0.001$ ]<br>(0.874;0.999) | 0.822 [ $<0.001$ ]<br>(0.781;0.865) |
| rurality                  | 1.060 [ $<0.001$ ]<br>(1.029;1.091) | 1.025 [ $<0.001$ ]<br>(0.991;1.062) | 1.010 [0.463]<br>(0.984;1.037)      |
| $\overline{PTP}$          | 0.997 [0.278]<br>(0.992;1.002)      | 0.998 [0.278]<br>(0.992;1.004)      | 0.997 [0.140]<br>(0.993;1.001)      |
| <b>observations</b>       | <b>28,136</b>                       | <b>28,136</b>                       | <b>28,136</b>                       |

P-values in square brackets, 95%-confidence intervals in parentheses

Abbreviations:  $\overline{PTN}$ : mean-centered patient-to-nurse ratio;  $\overline{skill}$ : mean-centered skill-mix ratio; PCCL: Patient Clinical Complexity Level index

†Fixed effects for unit types, months, and bed categories (50–299, 300–499, 500–749, and at least 750) and between-unit effects for PTN and skill mix included but not shown.

A.4: Regression results random effects model

| effect <sup>†</sup>       | (1) general nursing care               | (2) guidance                           | (3) loyalty                            |
|---------------------------|----------------------------------------|----------------------------------------|----------------------------------------|
| $\overline{PTN}$          | -0.006 [0.009]<br>(-0.011;-0.002)      | -0.007 [0.045]<br>(-0.014;0.000)       | -0.010 [ $<0.001$ ]<br>(-0.015;-0.005) |
| $\overline{PTN}^2$        | 0.001 [0.003]<br>(0.000;0.002)         | 0.001 [0.037]<br>(0.000;0.002)         | 0.001 [0.003]<br>(0.000;0.002)         |
| $\overline{skill}$        | -0.003 [ $<0.001$ ]<br>(-0.004;-0.001) | -0.005 [ $<0.001$ ]<br>(-0.007;-0.003) | -0.003 [ $<0.001$ ]<br>(-0.005;-0.002) |
| PCCL                      | -0.048 [ $<0.001$ ]<br>(-0.057;-0.039) | -0.034 [ $<0.001$ ]<br>(-0.047;-0.022) | -0.027 [ $<0.001$ ]<br>(-0.036;-0.018) |
| age                       | 0.022 [ $<0.001$ ]<br>(0.018;0.025)    | 0.018 [ $<0.001$ ]<br>(0.013;0.023)    | 0.018 [ $<0.001$ ]<br>(0.014;0.022)    |
| age <sup>2</sup>          | 0.000 [ $<0.001$ ]<br>(0.000;0.000)    | 0.000 [ $<0.001$ ]<br>(0.000;0.000)    | 0.000 [ $<0.001$ ]<br>(0.000;0.000)    |
| gender<br>(= 1 if female) | -0.192 [ $<0.001$ ]<br>(-0.210;-0.174) | -0.276 [ $<0.001$ ]<br>(-0.303;-0.249) | -0.140 [ $<0.001$ ]<br>(-0.159;-0.121) |
| rurality                  | 0.014 [0.004]<br>(0.004;0.024)         | 0.028 [ $<0.001$ ]<br>(0.014;0.042)    | 0.004 [0.373]<br>(-0.005;0.014)        |
| $\overline{PTP}$          | -0.002 [0.030]<br>(-0.003;0.000)       | -0.003 [0.026]<br>(-0.005;0.000)       | -0.002 [0.013]<br>(-0.003;0.000)       |
| <b>observations</b>       | <b>28,136</b>                          | <b>28,136</b>                          | <b>28,136</b>                          |

P-values in square brackets, 95%-confidence intervals in parentheses

Abbreviations:  $\overline{PTN}$ : mean-centered patient-to-nurse ratio;  $\overline{skill}$ : mean-centered skill-mix ratio; PCCL: Patient Clinical Complexity Level index

†Fixed effects for months and bed categories (50–299, 300–499, 500–749, and at least 750) and between-unit effects for PTN and skill mix included but not shown.

## Nurse staffing and patient-perceived quality of nursing care

## A.5: Regression results subgroup analysis case severity

| effect <sup>†</sup>       | (1) general nursing care          |                                   | (2) guidance                      |                                   | (3) loyalty                       |                                   |
|---------------------------|-----------------------------------|-----------------------------------|-----------------------------------|-----------------------------------|-----------------------------------|-----------------------------------|
|                           | low (PCCL=0)                      | high (PCCL>0) <sup>††</sup>       | low (PCCL=0)                      | high (PCCL>0) <sup>††</sup>       | low (PCCL=0)                      | high (PCCL>0) <sup>††</sup>       |
| $\overline{PTN}$          | -0.019 [0.009]<br>(-0.033;-0.005) | -0.022 [0.121]<br>(-0.051;-0.003) | -0.021 [0.051]<br>(-0.043;0.000)  | -0.024 [0.245]<br>(-0.063;0.016)  | -0.025 [0.001]<br>(-0.040;-0.010) | -0.022 [0.142]<br>(-0.050;-0.007) |
| $\overline{PTN}^2$        | 0.001 [0.009]<br>(0.000;0.002)    | 0.001 [0.222]<br>(-0.001;0.003)   | 0.001 [0.066]<br>(0.000;0.003)    | 0.001 [0.312]<br>(-0.001;0.004)   | 0.001 [0.004]<br>(0.000;0.002)    | 0.001 [0.375]<br>(-0.001;0.003)   |
| $\overline{skill}$        | -0.003 [0.001]<br>(-0.005;-0.001) | -0.003 [0.070]<br>(-0.006;0.000)  | -0.005 [0.001]<br>(-0.008;-0.003) | -0.004 [0.079]<br>(-0.008;0.000)  | -0.004 [0.001]<br>(-0.005;-0.002) | -0.003 [0.059]<br>(-0.006;0.000)  |
| PCCL                      | —                                 | -0.038 [0.001]<br>(-0.055;-0.021) | —                                 | -0.008 [0.505]<br>(-0.032;0.016)  | —                                 | -0.021 [0.017]<br>(-0.038;-0.004) |
| age                       | 0.018 [0.001]<br>(0.014;0.022)    | 0.030 [0.001]<br>(0.022;0.038)    | 0.015 [0.001]<br>(0.009;0.021)    | 0.022 [0.001]<br>(0.011;0.033)    | 0.015 [0.001]<br>(0.011;0.019)    | 0.022 [0.001]<br>(0.014;0.030)    |
| age <sup>2</sup>          | 0.000 [0.001]<br>(0.000;0.000)    | 0.000 [0.001]<br>(0.000;0.000)    | 0.000 [0.024]<br>(0.000;0.000)    | 0.000 [0.001]<br>(0.000;0.000)    | 0.000 [0.001]<br>(0.000;0.000)    | 0.000 [0.001]<br>(0.000;0.000)    |
| gender<br>(= 1 if female) | -0.190 [0.001]<br>(-0.211;-0.169) | -0.193 [0.004]<br>(-0.231;-0.154) | -0.283 [0.001]<br>(-0.315;-0.252) | -0.252 [0.001]<br>(-0.306;-0.198) | -0.142 [0.001]<br>(-0.164;-0.120) | -0.128 [0.001]<br>(-0.167;-0.089) |
| rurality                  | 0.009 [0.125]<br>(-0.002;0.020)   | 0.029 [0.004]<br>(0.009;0.048)    | 0.021 [0.015]<br>(0.004;0.037)    | 0.050 [0.001]<br>(0.023;0.077)    | -0.001 [0.848]<br>(-0.013;0.010)  | 0.020 [0.050]<br>(0.000;0.039)    |
| $\overline{PTP}$          | -0.001 [0.175]<br>(-0.003;0.001)  | -0.003 [0.073]<br>(-0.006;0.000)  | -0.002 [0.226]<br>(-0.004;0.001)  | -0.005 [0.027]<br>(-0.010;-0.001) | -0.001 [0.120]<br>(-0.003;0.000)  | -0.003 [0.039]<br>(-0.007;0.000)  |
| observations              | 20,624                            | 7,512                             | 20,624                            | 7,512                             | 20,624                            | 7,512                             |

P-values in square brackets, 95%-confidence intervals in parentheses

Abbreviations:  $\overline{PTN}$ : mean-centered patient-to-nurse ratio;  $\overline{skill}$ : mean-centered skill-mix ratio; PCCL: Patient Clinical Complexity Level index

<sup>†</sup>Fixed effects for months and bed categories (50—299, 300—499, 500—749, and at least 750) and between-unit effects for PTN and skill mix included but not shown.

<sup>††</sup>Subgroup “high” comprises patients with a PCCL from 1 to 6.

A.6: Regression results subgroup analysis hospital size<sup>††</sup>

| effect <sup>†</sup>       | (1) general nursing care          |                                   | (2) guidance                      |                                   | (3) loyalty                       |                                   |
|---------------------------|-----------------------------------|-----------------------------------|-----------------------------------|-----------------------------------|-----------------------------------|-----------------------------------|
|                           | small                             | large                             | small                             | large                             | small                             | large                             |
| $\overline{PTN}$          | -0.018 [0.024]<br>(-0.034;-0.002) | -0.015 [0.186]<br>(-0.037;0.007)  | -0.009 [0.447]<br>(-0.033;-0.015) | -0.031 [0.058]<br>(-0.063;0.001)  | -0.024 [0.005]<br>(-0.040;-0.007) | -0.014 [0.216]<br>(-0.037;0.008)  |
| $\overline{PTN}^2$        | 0.001 [0.048]<br>(0.000;0.002)    | 0.001 [0.155]<br>(0.000;0.002)    | 0.000 [0.660]<br>(-0.001;0.002)   | 0.002 [0.041]<br>(0.000;0.004)    | 0.001 [0.035]<br>(0.000;0.002)    | 0.001 [0.245]<br>(-0.001;0.002)   |
| $\overline{skill}$        | -0.004 [0.001]<br>(-0.006;-0.002) | -0.002 [0.183]<br>(-0.004;0.001)  | -0.005 [0.002]<br>(-0.008;-0.002) | -0.004 [0.009]<br>(-0.008;-0.001) | -0.005 [0.001]<br>(-0.007;-0.003) | -0.001 [0.369]<br>(-0.003;0.001)  |
| PCCL                      | -0.050 [0.001]<br>(-0.062;-0.037) | -0.046 [0.001]<br>(-0.058;-0.035) | -0.043 [0.001]<br>(-0.062;-0.024) | -0.028 [0.002]<br>(-0.045;-0.011) | -0.034 [0.001]<br>(-0.047;-0.021) | -0.022 [0.001]<br>(-0.035;-0.010) |
| age                       | 0.026 [0.001]<br>(0.021;0.030)    | 0.017 [0.001]<br>(0.012;0.022)    | 0.023 [0.001]<br>(0.016;0.030)    | 0.012 [0.002]<br>(0.004;0.019)    | 0.022 [0.001]<br>(0.017;0.027)    | 0.013 [0.001]<br>(0.008;0.018)    |
| age <sup>2</sup>          | 0.000 [0.001]<br>(0.000;0.000)    | 0.000 [0.001]<br>(0.000;0.000)    | 0.000 [0.001]<br>(0.000;0.000)    | 0.000 [0.097]<br>(0.000;0.000)    | 0.000 [0.001]<br>(0.000;0.000)    | 0.000 [0.002]<br>(0.000;0.000)    |
| gender<br>(= 1 if female) | -0.165 [0.001]<br>(-0.189;-0.140) | -0.223 [0.001]<br>(-0.251;-0.195) | -0.245 [0.001]<br>(-0.282;-0.208) | -0.311 [0.001]<br>(-0.351;-0.271) | -0.116 [0.001]<br>(-0.141;-0.090) | -0.166 [0.001]<br>(-0.195;-0.138) |
| rurality                  | 0.010 [0.148]<br>(0.003;0.023)    | 0.020 [0.006]<br>(0.006;0.034)    | 0.033 [0.001]<br>(0.013;0.053)    | 0.024 [0.020]<br>(0.004;0.044)    | -0.007 [0.337]<br>(-0.020;0.007)  | 0.017 [0.020]<br>(0.003;0.032)    |
| $\overline{PTP}$          | 0.000 [0.885]<br>(-0.002;0.002)   | -0.004 [0.006]<br>(-0.006;-0.034) | -0.001 [0.711]<br>(-0.003;0.002)  | -0.006 [0.007]<br>(-0.009;-0.002) | 0.000 [0.884]<br>(-0.002;0.002)   | -0.005 [0.001]<br>(-0.008;-0.002) |
| observations              | 14,387                            | 13,749                            | 14,387                            | 13,749                            | 14,387                            | 13,749                            |

P-values in square brackets, 95%-confidence intervals in parentheses

Abbreviations:  $\overline{PTN}$ : mean-centered patient-to-nurse ratio;  $\overline{skill}$ : mean-centered skill-mix ratio; PCCL: Patient Clinical Complexity Level index

<sup>†</sup>Fixed effects for months and bed categories (50—299, 300—499, 500—749, and at least 750) and between-unit effects for PTN and skill mix included but not shown.

<sup>††</sup>subgroup small comprises hospitals with less than 500 bed; subgroup large comprises hospitals with 500 beds and more

**Nurse staffing and patient-perceived quality of nursing care**

**A.7: Regression results subgroup analysis medical vs. surgical patients**

| effect <sup>†</sup>       | (1) general nursing care           |                                    | (2) guidance                       |                                    | (3) loyalty                        |                                    |
|---------------------------|------------------------------------|------------------------------------|------------------------------------|------------------------------------|------------------------------------|------------------------------------|
|                           | medical                            | surgical                           | medical                            | surgical                           | medical                            | surgical                           |
| $\overline{PTN}$          | -0.014 [0.216]<br>(-0.037;0.008)   | -0.012 [0.159]<br>(-0.029;-0.005)  | -0.042 [0.015]<br>(-0.075;-0.008)  | -0.008 [0.510]<br>(-0.032;-0.016)  | -0.058 [<0.001]<br>(-0.081;-0.034) | -0.005 [0.594]<br>(-0.022;-0.013)  |
| $\overline{PTN}^2$        | 0.001 [0.245]<br>(-0.001;0.002)    | 0.000 [0.412]<br>(-0.001;0.002)    | 0.003 [0.003]<br>(0.001;0.005)     | 0.000 [0.965]<br>(-0.002;0.002)    | 0.004 [<0.001]<br>(0.002;0.005)    | 0.000 [0.831]<br>(-0.001;0.001)    |
| $\overline{skill}$        | -0.001 [0.369]<br>(-0.003;0.001)   | -0.003 [0.006]<br>(-0.005;-0.001)  | -0.004 [0.039]<br>(-0.007;0.000)   | -0.005 [0.001]<br>(-0.008;-0.002)  | -0.003 [0.025]<br>(-0.005;0.000)   | -0.003 [0.002]<br>(-0.006;-0.001)  |
| PCCL                      | -0.022 [<0.001]<br>(-0.035;-0.010) | -0.060 [<0.001]<br>(-0.072;-0.047) | -0.021 [0.035]<br>(0.004;-0.022)   | -0.051 [<0.001]<br>(-0.069;-0.033) | -0.019 [0.006]<br>(-0.033;-0.006)  | -0.040 [<0.001]<br>(-0.053;-0.027) |
| age                       | 0.013 [<0.001]<br>(0.008;0.018)    | 0.023 [<0.001]<br>(0.018;0.028)    | 0.013 [0.003]<br>(0.004;0.022)     | 0.021 [<0.001]<br>(0.014;0.028)    | 0.016 [<0.001]<br>(0.010;0.022)    | 0.021 [<0.001]<br>(0.016;0.026)    |
| age <sup>2</sup>          | 0.000 [0.002]<br>(0.000;0.000)     | 0.000 [<0.001]<br>(0.000;0.000)    | 0.000 [0.085]<br>(0.000;0.000)     | 0.000 [<0.001]<br>(0.000;0.000)    | 0.000 [<0.001]<br>(0.000;0.000)    | 0.000 [<0.001]<br>(0.000;0.000)    |
| gender<br>(= 1 if female) | -0.166 [<0.001]<br>(-0.195;-0.138) | -0.183 [<0.001]<br>(-0.208;-0.159) | -0.294 [<0.001]<br>(-0.338;-0.250) | -0.255 [<0.001]<br>(-0.291;-0.219) | -0.165 [<0.001]<br>(-0.195;-0.134) | -0.122 [<0.001]<br>(-0.141;-0.097) |
| rurality                  | 0.017 [0.020]<br>(0.003;0.032)     | 0.017 [0.015]<br>(0.003;0.030)     | 0.018 [0.118]<br>(-0.005;0.041)    | 0.038 [<0.001]<br>(0.019;0.057)    | 0.001 [0.886]<br>(-0.017;0.015)    | 0.007 [0.293]<br>(-0.006;-0.021)   |
| $\overline{PTP}$          | -0.005 [0.020]<br>(-0.008;-0.002)  | 0.001 [0.490]<br>(-0.002;0.004)    | -0.004 [0.024]<br>(-0.008;-0.001)  | 0.000 [0.819]<br>(-0.004;0.005)    | -0.004 [0.005]<br>(-0.006;-0.001)  | 0.000 [0.764]<br>(-0.003;0.003)    |
| <b>observations</b>       | <b>11,868</b>                      | <b>13,769</b>                      | <b>11,868</b>                      | <b>13,769</b>                      | <b>11,868</b>                      | <b>13,769</b>                      |

P-values in square brackets, 95%-confidence intervals in parentheses

Abbreviations:  $\overline{PTN}$ : mean-centered patient-to-nurse ratio;  $\overline{skill}$ : mean-centered skill-mix ratio; PCCL: Patient Clinical Complexity Level index

†Fixed effects for months and bed categories (50–299, 300–499, 500–749, and at least 750) and between-unit effects for PTN and skill mix included but not shown.

1  
2  
3  
4  
5  
6  
7  
8  
9  
10  
11  
12  
13  
14  
15  
16  
17  
18  
19  
20  
21  
22  
23  
24  
25  
26  
27  
28  
29  
30  
31  
32  
33  
34  
35  
36  
37  
38  
39  
40  
41  
42  
43  
44  
45  
46  
47  
48  
49  
50  
51  
52  
53  
54  
55  
56  
57  
58  
59  
60STROBE Statement—Checklist of items that should be included in reports of *cross-sectional studies*

|                           | Item No | Recommendation                                                                                                                                                                                    | page              |
|---------------------------|---------|---------------------------------------------------------------------------------------------------------------------------------------------------------------------------------------------------|-------------------|
| <b>Title and abstract</b> | 1       | (a) Indicate the study's design with a commonly used term in the title or the abstract                                                                                                            | p. 1              |
|                           |         | (b) Provide in the abstract an informative and balanced summary of what was done and what was found                                                                                               | p. 2              |
| <b>Introduction</b>       |         |                                                                                                                                                                                                   |                   |
| Background/rationale      | 2       | Explain the scientific background and rationale for the investigation being reported                                                                                                              | p. 4              |
| Objectives                | 3       | State specific objectives, including any prespecified hypotheses                                                                                                                                  | p. 5              |
| <b>Methods</b>            |         |                                                                                                                                                                                                   |                   |
| Study design              | 4       | Present key elements of study design early in the paper                                                                                                                                           | p. 5 ff.          |
| Setting                   | 5       | Describe the setting, locations, and relevant dates, including periods of recruitment, exposure, follow-up, and data collection                                                                   | p. 6              |
| Participants              | 6       | (a) Give the eligibility criteria, and the sources and methods of selection of participants                                                                                                       | p. 6              |
| Variables                 | 7       | Clearly define all outcomes, exposures, predictors, potential confounders, and effect modifiers. Give diagnostic criteria, if applicable                                                          | p. 6 ff.          |
| Data sources/measurement  | 8*      | For each variable of interest, give sources of data and details of methods of assessment (measurement). Describe comparability of assessment methods if there is more than one group              | p. 6 ff.          |
| Bias                      | 9       | Describe any efforts to address potential sources of bias                                                                                                                                         | p. 8 f.           |
| Study size                | 10      | Explain how the study size was arrived at                                                                                                                                                         | p. 6              |
| Quantitative variables    | 11      | Explain how quantitative variables were handled in the analyses. If applicable, describe which groupings were chosen and why                                                                      | p. 6 ff.          |
| Statistical methods       | 12      | (a) Describe all statistical methods, including those used to control for confounding                                                                                                             | p. 8 f.           |
|                           |         | (b) Describe any methods used to examine subgroups and interactions                                                                                                                               | p. 8 f.           |
|                           |         | (c) Explain how missing data were addressed                                                                                                                                                       | p. 9              |
|                           |         | (d) If applicable, describe analytical methods taking account of sampling strategy                                                                                                                | n.a.              |
|                           |         | (e) Describe any sensitivity analyses                                                                                                                                                             | p. 8 f.           |
| <b>Results</b>            |         |                                                                                                                                                                                                   |                   |
| Participants              | 13*     | (a) Report numbers of individuals at each stage of study—eg numbers potentially eligible, examined for eligibility, confirmed eligible, included in the study, completing follow-up, and analysed | p. 6              |
|                           |         | (b) Give reasons for non-participation at each stage                                                                                                                                              | n.a.              |
|                           |         | (c) Consider use of a flow diagram                                                                                                                                                                | n.a.              |
| Descriptive data          | 14*     | (a) Give characteristics of study participants (eg demographic, clinical, social) and information on exposures and potential confounders                                                          | p. 9, table A.1   |
|                           |         | (b) Indicate number of participants with missing data for each variable of interest                                                                                                               | n.a.              |
| Outcome data              | 15*     | Report numbers of outcome events or summary measures                                                                                                                                              | p. 9, table 2     |
| Main results              | 16      | (a) Give unadjusted estimates and, if applicable, confounder-adjusted estimates and their precision (eg, 95% confidence interval). Make clear                                                     | p. 10 f., table 3 |

|                          |    |                                                                                                                                                                            |                                           |
|--------------------------|----|----------------------------------------------------------------------------------------------------------------------------------------------------------------------------|-------------------------------------------|
|                          |    | which confounders were adjusted for and why they were included                                                                                                             |                                           |
|                          |    | (b) Report category boundaries when continuous variables were categorized                                                                                                  | p. 8 f.                                   |
|                          |    | (c) If relevant, consider translating estimates of relative risk into absolute risk for a meaningful time period                                                           | n.a.                                      |
| Other analyses           | 17 | Report other analyses done—eg analyses of subgroups and interactions, and sensitivity analyses                                                                             | p. 10 f., tables<br>A.2, A.3,<br>A.4, A.5 |
| <b>Discussion</b>        |    |                                                                                                                                                                            |                                           |
| Key results              | 18 | Summarise key results with reference to study objectives                                                                                                                   | p. 11 f.                                  |
| Limitations              | 19 | Discuss limitations of the study, taking into account sources of potential bias or imprecision. Discuss both direction and magnitude of any potential bias                 | p. 14                                     |
| Interpretation           | 20 | Give a cautious overall interpretation of results considering objectives, limitations, multiplicity of analyses, results from similar studies, and other relevant evidence | p. 11 ff.                                 |
| Generalisability         | 21 | Discuss the generalisability (external validity) of the study results                                                                                                      | p. 11 ff.                                 |
| <b>Other information</b> |    |                                                                                                                                                                            |                                           |
| Funding                  | 22 | Give the source of funding and the role of the funders for the present study and, if applicable, for the original study on which the present article is based              | p. 18                                     |

\*Give information separately for exposed and unexposed groups.

**Note:** An Explanation and Elaboration article discusses each checklist item and gives methodological background and published examples of transparent reporting. The STROBE checklist is best used in conjunction with this article (freely available on the Web sites of PLoS Medicine at <http://www.plosmedicine.org/>, Annals of Internal Medicine at <http://www.annals.org/>, and Epidemiology at <http://www.epidem.com/>). Information on the STROBE Initiative is available at [www.strobe-statement.org](http://www.strobe-statement.org).

# BMJ Open

## Nurse staffing and patient-perceived quality of nursing care: A cross-sectional analysis of survey and administrative data in German hospitals

|                                 |                                                                                                                                                                                                                                                                          |
|---------------------------------|--------------------------------------------------------------------------------------------------------------------------------------------------------------------------------------------------------------------------------------------------------------------------|
| Journal:                        | <i>BMJ Open</i>                                                                                                                                                                                                                                                          |
| Manuscript ID                   | bmjopen-2021-051133.R2                                                                                                                                                                                                                                                   |
| Article Type:                   | Original research                                                                                                                                                                                                                                                        |
| Date Submitted by the Author:   | 12-Oct-2021                                                                                                                                                                                                                                                              |
| Complete List of Authors:       | Winter, Vera; University of Wuppertal; University of Hamburg<br>Dietermann, Karina; University of Hamburg, Hamburg Center for Health Economics<br>Schneider, Udo; Techniker Krankenkasse<br>Schreyögg, Jonas; University of Hamburg, Hamburg Center for Health Economics |
| <b>Primary Subject Heading</b>: | Health services research                                                                                                                                                                                                                                                 |
| Secondary Subject Heading:      | Nursing                                                                                                                                                                                                                                                                  |
| Keywords:                       | Human resource management < HEALTH SERVICES ADMINISTRATION & MANAGEMENT, Quality in health care < HEALTH SERVICES ADMINISTRATION & MANAGEMENT, Health & safety < HEALTH SERVICES ADMINISTRATION & MANAGEMENT                                                             |
|                                 |                                                                                                                                                                                                                                                                          |

SCHOLARONE™  
Manuscripts



I, the Submitting Author has the right to grant and does grant on behalf of all authors of the Work (as defined in the below author licence), an exclusive licence and/or a non-exclusive licence for contributions from authors who are: i) UK Crown employees; ii) where BMJ has agreed a CC-BY licence shall apply, and/or iii) in accordance with the terms applicable for US Federal Government officers or employees acting as part of their official duties; on a worldwide, perpetual, irrevocable, royalty-free basis to BMJ Publishing Group Ltd ("BMJ") its licensees and where the relevant Journal is co-owned by BMJ to the co-owners of the Journal, to publish the Work in this journal and any other BMJ products and to exploit all rights, as set out in our [licence](#).

The Submitting Author accepts and understands that any supply made under these terms is made by BMJ to the Submitting Author unless you are acting as an employee on behalf of your employer or a postgraduate student of an affiliated institution which is paying any applicable article publishing charge ("APC") for Open Access articles. Where the Submitting Author wishes to make the Work available on an Open Access basis (and intends to pay the relevant APC), the terms of reuse of such Open Access shall be governed by a Creative Commons licence – details of these licences and which [Creative Commons](#) licence will apply to this Work are set out in our licence referred to above.

Other than as permitted in any relevant BMJ Author's Self Archiving Policies, I confirm this Work has not been accepted for publication elsewhere, is not being considered for publication elsewhere and does not duplicate material already published. I confirm all authors consent to publication of this Work and authorise the granting of this licence.



1  
2  
3 **Nurse staffing and patient-perceived quality of nursing care: A cross-sectional analysis of survey and**  
4 **administrative data in German hospitals**  
5  
6  
7

8 Vera Winter<sup>a,b</sup>, Karina Dietermann<sup>b</sup>, Udo Schneider<sup>c</sup>, Jonas Schreyögg<sup>b</sup>  
9

10  
11 Author affiliations:  
12

13 <sup>a</sup> Schumpeter School of Business and Economics, University of Wuppertal, Rainer-Gruenter-Str. 21,  
14 42119 Wuppertal, Germany, winter@wiwi.uni-wuppertal.de. *Corresponding author*  
15

16 <sup>b</sup> Hamburg Center for Health Economics, University of Hamburg, Hamburg, Germany  
17

18 <sup>c</sup> Techniker Krankenkasse, Hamburg, Germany  
19  
20  
21  
22  
23  
24

25 **Word count of the manuscript: 5,100**  
26  
27  
28  
29  
30  
31  
32  
33  
34  
35  
36  
37  
38  
39  
40  
41  
42  
43  
44  
45  
46  
47  
48  
49  
50  
51  
52  
53  
54  
55  
56  
57  
58  
59  
60

## Abstract

**Objective:** To examine the impact of nurse staffing on patient-perceived quality of nursing care. We differentiate nurse staffing levels and nursing skill mix as two facets of nurse staffing and use a multi-dimensional instrument for patient-perceived quality of nursing care. We investigate non-linear and interaction effects.

**Setting:** The study setting was 3,458 hospital units in 1,017 hospitals in Germany.

**Participants:** We contacted 212,554 patients discharged from non-pediatric, non-intensive, and non-psychiatric hospital units who stayed at least two nights in the hospital between January and October 2019. Of those, 30,174 responded, yielding a response rate of 14.2%. Our sample included only those patients. After excluding extreme values for our nurse staffing variables and removing observations with missing values, our final sample comprised 28,136 patients ranging from 18 to 97 years of age (average: 61.12 years) who had been discharged from 3,458 distinct hospital units in 1,017 hospitals.

**Primary and secondary outcome measures:** Patient-perceived quality of nursing care (general nursing care, guidance provided by nurses, and patient loyalty to the hospital)

**Results:** For all three dimensions of patient-perceived quality of nursing care, we found that they significantly decreased as (a) nurse staffing levels decreased (with decreasing marginal effects) and (b) the proportion of assistant nurses in a hospital unit increased. The association between nurse staffing levels and quality of nursing care was more pronounced among patients who were less clinically complex, were admitted to smaller hospitals, or were admitted to medical units.

**Conclusions:** Our results indicate that, in addition to nurse staffing levels, nursing skill mix is crucial for providing the best possible quality of nursing care from the patient perspective and both should be considered when designing policies such as minimum staffing regulations to improve the quality of nursing care in hospitals.

## Article summary

### Strengths and limitations of this study

- This study combines administrative data on hospital unit level nurse staffing with a multi-dimensional survey instrument that covers three aspects of patient-perceived quality of nursing care in a sample of 28,136 patients discharged from 3,458 hospital units in Germany in 2019
- This study demonstrates that the effect of nurse staffing on patient-perceived quality of care is non-linear and depending on patient and hospital characteristics (patient case severity, hospital size, and medical versus surgical patients)
- Besides patient-to-nurse ratios, the study also adds insight on the effect of skill mix and patient-to-physician ratios on patient-perceived quality of nursing care
- The study is cross-sectional and cannot account for all potential endogeneity problems / Even though considering the hospital unit type level is advantageous to using hospital-level aggregated data, omitted variables on hospital unit and patient level might remain.

### Keywords (MeSH Terms)

Nursing Staff, Hospital; Health Workforce; Nurse-Patient Relations; Nursing Care; Patient-Centered Care; Health Care Surveys

## INTRODUCTION AND BACKGROUND

Nurses are responsible for delivering the highest proportion of care to patients in hospitals and therefore a main contributor to quality of hospital care. Nurses who work on units with inadequate staffing are probably not working as effective and efficient as nurses on better-staffed and better-skilled units. As a result, nurses do not have enough time for providing care and instructions, observe vital signs timely, and to respond to patients' individual needs., which leads to missed care and ultimately unfavourable clinical patient outcomes and bad patient experiences and perceptions of quality of care. A large body of empirical studies, including several literature reviews and meta-analyses, has examined how nurse staffing levels affect patient outcomes.[1–10] Most studies have thereby relied on clinical outcomes available in administrative data and e.g. found significant effects of nurse staffing on mortality, pressure ulcers, and pneumonia.[3] Several studies depict that the effect of inadequate nurse staffing on adverse events is through missed care.[11–13] In light of calls for care (and, indeed, research) to be more patient oriented and for health systems to become more responsive to patient needs and expectations,[14–16] the number of studies examining links between nurse staffing patterns and patient experiences of care – i.e., perceived quality of care – has steadily grown.[15–17] In addition, in the wake of many studies on the effects of skill mix on clinical outcomes,[see 3] recent studies investigated the association between skill mix and patient-perceived quality of care.[15, 18, 19]

Several empirical studies that have analyzed the relationship between nurse staffing levels and perceived quality of care have considered the nurse's rather than the patient's perspective.[19–22] While the former is of course crucial, there is evidence that nurses' perceptions of the quality of their work can deviate substantially from the patients' perceptions[23]. In addition, most studies that have analyzed quality of care as an outcome have used measures that are very general (e.g., single items to rate overall quality of care or patient safety).[17, 22, 24, 25] Outcome measures like these are less informative about the quality of care provided by nurses and therefore potentially less sensitive to nurse staffing. Some studies have used multi-dimensional constructs of patient satisfaction or patient experience with care. Yet, these constructs usually comprise dimensions and indicators that do not relate to nursing care, but other aspects, such as responsiveness of hospital staff, discharge information, and overall hospital rating, all of which are also indicators of other health professionals' quality of care.[11, 16, 20, 26] . Only a handful of studies have used items that ask directly about the quality of care provided by nurses, or quality of nursing care.[20–22] To our knowledge, no studies to date have used a validated, multi-item, and multi-dimensional scale for patient-perceived quality of nursing care.

1  
2  
3 Methodologically, examining the link between nurse staffing and patient outcomes is at risk of  
4 endogeneity problems, such as omitted variable bias (e.g., skill mix, hospital-unit-type and patient  
5 characteristics, or physician staffing could all be related to nurse staffing and patient outcomes) or  
6 endogenous sorting (whereby hospitals devote more resources to patients with a higher risk of adverse  
7 outcomes).[1, 4, 8, 16, 27] The risk of endogeneity increases with the level of aggregation; as many  
8 studies use staffing information at the aggregated hospital level,[6, 17, 20, 21, 28, 29] they do not  
9 consider important information at the level of hospital units [7, 30, 31] or of patients.[16, 32] At the  
10 other extreme, using micro level data on the patient level [as e.g., 32, 33] usually implies substantial  
11 primary data collection efforts and a focus on one or few organizations, hence limiting generalizability.  
12 As an in-between approach, the number of studies using data at the level of hospital units has grown,[7,  
13 31, 34–39] yet often suffers from limited sample sizes both in terms of patients and hospitals.[15] In  
14 addition, recent evidence hints to the fact the effect of nurse staffing on quality of nursing care non-  
15 linear, i.e., the effect of an additional nurse per patient might be high if nurse staffing is low; with higher  
16 numbers of nurses, the effect of each additional nurse probably decreases.[15] Furthermore, recent  
17 studies indicate that the association between nurse staffing and patient outcomes can differ depending  
18 on patients' case severity,[8, 40] hospital size,[6, 41], and between medical versus surgical units.[8, 28]  
19 Yet most of these studies have analyzed the associations between nurse staffing and clinical patient  
20 outcomes.  
21  
22  
23  
24  
25  
26  
27  
28  
29  
30  
31  
32  
33

34 The present study aims to shed further light on the association between nurse staffing and patient-  
35 perceived quality of nursing care. In particular, we examine this relationship between nurse staffing  
36 levels, nurse skill mix, and patient-perceived quality of nursing care based on large-scale survey data  
37 combined with administrative data. Especially the use of a multi-dimensional survey instrument  
38 reflecting the patient perspective on nursing quality for measuring this relationship is quite novel.  
39 Second, we addressed substantial parts of potential endogeneity by including a rich set of patient- and  
40 hospital-related control variables. Thereby, we specifically consider physician staffing and investigate to  
41 which degree physician staffing is a relevant predictor of patient-perceived quality of nursing care. In  
42 addition, we apply a fixed effects model to account for differences across hospital unit types, which  
43 seems important to reduce endogeneity problems. Finally, we allow for non-linear effects of nurse  
44 staffing on quality of nursing care and conduct sub-group analyses on patient case severity, hospital size,  
45 and medical versus surgical hospital units.  
46  
47  
48  
49  
50  
51  
52  
53  
54  
55  
56  
57  
58  
59  
60

## METHODS

### Data and sample

This study is part of a larger project on the association between nurse staffing and quality of care.[3, 42, 43] Our study analyzed data from an online patient survey. To ensure the quality of the survey, we followed the scientific standards for scale development. The entire development and validation of the survey is described elsewhere [43]. To sum up our proceeding, we drew on a systematic literature search and expert interviews to derive our initial items. We conducted two pre-tests (one paper and pencil pre-test and one online pre-test) with different participants and collected, discussed, and reported all changes made to the survey. After data collection, we performed comprehensive exploratory and confirmatory factor analyses to ensure the validity and reliability of the survey. We combined the survey data with (a) claims data provided by the largest statutory health insurance fund in Germany and (b) data from the mandatory quality reports published annually by each hospital in the country. The combined data set comprised data from patients discharged from non-pediatric, non-intensive, and non-psychiatric hospital units between January and October 2019. We define a hospital unit as an operating unit within a hospital that focuses on specific types of patients (e.g., geriatrics or cardiology). Our sample included only those patients who stayed at least two nights in the hospital. We contacted patients in monthly waves and asked them to participate in the survey, eight weeks after they had been discharged from the hospital at the latest. The survey contained questions related to patients' perceptions of the quality of the nursing care provided during their hospital stay. Each patient was contacted only once. In total, we contacted 212,554 patients, of whom 30,174 responded, yielding a response rate of 14.2%. The response rate is comparable to other large-scale patient surveys. We checked for representativeness of the study population. Compared to the general population of hospitalized patients in Germany, our sample is generally representative in observable characteristics. Only the share of patients older than 80 is lower in our sample compared to the general population of hospitalized patients in Germany. We also compared respondents to non-respondents and did not find any substantial deviations in observable characteristics.

The claims data in our data set contained patient-level information about the course of disease during each patient's hospital stay, as well as the dates of hospital admission and discharge, the type of hospital unit, and ICD codes. The quality reports contained general information at the hospital unit level, such as the number of patient cases treated and staffing numbers that relate to the situation at the end of 2017.

## Nurse staffing

We obtained the nurse staffing level in each hospital unit by calculating a patient-to-nurse ratio (PTN) in line with the definition for measuring nursing workload as suggested by the National Office of Statistics in Germany.[44] The patient-to-nurse ratio indicates how many patients a nurse has to care for during an average shift and is given by:

$$PTN = \frac{\text{occupation days} * 24\text{hours}}{\text{nurses} * 220\text{days} * 8\text{hours}}, \text{ with}$$

$$\text{occupation days} = \text{inpatient} * \text{average length of stay}.$$

The total number of nurses (based on full-time nurses employed) comprise all registered nurses with at least three years of training and assistant nurses with at least one year of training. The numbers are derived from the annual quality reports of each hospital, representing the situation at the end of the year and not accounting for sickness absences or other sources of within-year variations such as variation caused by holidays. To calculate occupation days, we used the number of inpatients and approximated the average length of stay of each hospital unit based on the average length of stay of more than 6.2 million inpatient cases available in our claims data set over the period 2014 to 2019. We draw on the five-year period for this approximation because we cannot observe all patients in each hospital unit in one year; to ensure robustness, we considered only those hospital units with more than 150 observations to approximate the length of stay.

In addition to staffing levels, we accounted for the skill mix in each hospital unit by calculating the ratio of assistant nurses to the total number of nurses (measured in full-time equivalents):

$$\text{skill mix} = \frac{\text{assistant nurses}}{\text{nurses}}.$$

We excluded extreme values, i.e., patient-to-nurse ratios below 1 and above 20, as well as skill-mix ratios above 25%.

## Quality of nursing care

Because the definition of nursing care varies from country to country, it is necessary to use an instrument that takes country-specific regulations into account. We therefore chose the Patients' Experience of Nursing Quality in Acute Hospitals (PENQuAH) instrument developed by Blume to analyze the relationship between nurse staffing and patient outcomes.[43] The instrument was designed to evaluate patients' perceptions of quality of nursing care in German hospitals. The instrument consists of

24 items, which were chosen based on a review of the literature and interviews with nursing experts. To examine the scale's dimensionality and factor-based validity, Blume conducted exploratory and confirmatory factor analyses with a randomly split sample.[43] Their exploratory factor analysis revealed that three main dimensions captured the structure of the underlying item set: general nursing care, guidance provided by nurses, and nurse-related patient loyalty to the hospital. The results of their confirmatory factor analysis suggested a good overall model fit (CFI = 0.978; TLI = 0.976). Table 1 shows the three dimensions and exemplary related items.

--- include table 1 about here ---

We calculated each dimension of quality of nursing care by taking the arithmetic mean of the underlying items after recoding reverse-coded items. Dimensions one and two are on a scale of one to five, with five representing the best quality of nursing care, and dimension three is on a scale of one to four, with four representing the best quality of nursing care. Dimension one represents patients' perception of the general quality of nursing care. Dimension two represents patients' perception of the guidance provided by nurses. Dimension three comprises two items that capture patients' loyalty to a hospital based on the nursing care provided.

### Statistical model

The results of previous studies suggest that the relationship between nurse staffing and patient outcomes varies across different types of hospital units.[8, 35, 42] To account more accurately for potential differences across the 24 unit types in our sample and to depict potential heteroscedastic structures in the error term of the regression, we applied a fixed effects model. The model is given by:

$$QoNC_{iu}^{(x)} = \alpha_0 + \alpha_{10} P\widetilde{T}N_{iu} + \alpha_{11} P\widetilde{T}N_{iu}^2 + \alpha_2 s\widetilde{k}ill_{iu} + \beta_1 \overline{PTN}_u + \beta_2 \overline{s\widetilde{k}ill}_u + \gamma C_{iu} + (v_{0u} + \varepsilon_{iu}),$$

where  $QoNC_{iu}^{(x)}$  is the value of one of the three factors  $x \in \{1, 2, 3\}$  for patient  $i$  admitted to unit type  $u$ ,  $u \in \{1, \dots, 24\}$ .  $\alpha_0$  is the intercept of the regression.  $P\widetilde{T}N_{iu} = (PTN_{iu} - \overline{PTN}_u)$  and  $s\widetilde{k}ill_{iu} = (skill_{iu} - \overline{s\widetilde{k}ill}_u)$  with coefficients  $\alpha_{10}$  and  $\alpha_0$  are the mean-centered independent nurse staffing variables of interest, which correspond to the patient-to-nurse and skill mix ratio of the hospital unit associated with patient  $i$  minus the group means  $\overline{PTN}_u$  and  $\overline{s\widetilde{k}ill}_u$  for each unit type  $u$ . Assuming that the marginal effect of the patient-to-nurse ratio on quality of nursing care decreases as staffing levels increase, we also



1  
2  
3 included a squared patient-to-nurse term with coefficient  $\alpha_{11}$ .  $\beta_1$  and  $\beta_2$  are the coefficients of the  
4 between-unit effects.  $C_{iu}$  represents a vector of patient-, hospital-, and hospital-unit-related control  
5 variables at level one of the model. First, it includes the patient-to-physician (PTP) ratio, because it might  
6 correlate with the PTN ratio and also affect the outcome.[e.g., 27] Second, we account for in patient  
7 risks by including age, gender, and each patient's case severity reflected by the Patient Clinical  
8 Complexity Level (PCCL) index (0-6), which indicates the degree of comorbidities and complications for  
9 each patient. It is derived from a closed list of comorbidities and complications and is meant to predict a  
10 patient's need for hospital resources, such as nursing care.[45] We directly incorporate the PCCL index in  
11 our model because sensitivity analyses using dummy variables for each score suggested a linear  
12 relationship. Furthermore, we control for the rurality of each patient's place of residence using an index  
13 ranging from one (urban area) to four (rural area), four hospital size categories (50—299, 300—499,  
14 500—749, and at least 750), and monthly fixed effects.  $\nu_{0u}$  refers to the fixed effects for the 24 hospital  
15 unit types.

16  
17  
18 As most previous studies used dichotomized outcome variables, we transformed our three quality of  
19 nursing care measures into dichotomous outcome variables and estimated a generalized version of our  
20 fixed effects model using a logit link function for comparability purposes, i.e. a logit model. To check the  
21 robustness of our main model, we estimated a random effects model. Lastly, replaced the Patient Clinical  
22 Complexity Level index with the Elixhauser comorbidity categories.[46]

23  
24  
25 Moreover, we conducted subgroup analyses. As suggested by previous studies, the association between  
26 nurse staffing and patient outcomes can differ depending on patients' case severity.[8, 40] To study  
27 these potential differences, we split our sample into patients with low case severity (Patient Clinical  
28 Complexity Level = 0) and those with high case severity (Patient Clinical Complexity Level > 0) and  
29 estimated our main regression model for each of the sub-samples. Additionally, we considered that our  
30 results might vary due to differences in hospital size.[6, 41] We therefore split our sample into two  
31 categories – i.e., patients admitted to hospitals with fewer than 500 beds (category “small”) and patients  
32 admitted to hospitals with at least 500 beds (category “large”). Lastly, by categorizing our unit types as  
33 medical or surgical, we estimated our statistical model separately for medical and surgical patients.

## 34 35 36 37 38 39 40 41 42 43 44 45 46 47 48 49 50 51 Patient and Public Involvement

52 This study is part of a larger project on the association between nurse staffing and quality of care.[3, 42,  
53 43] The public, i.e., a statutory health insurance, hospital managers, and patient representatives were  
54 involved in the design of the overall project. In addition, patients, practitioners (nurses, physiotherapists,  
55  
56  
57

doctors), and scientific experts were involved in the development of the survey (described in more detail in [3, 43]). Results of the study and the overall project will be disseminated to the participants via the statutory health insurance and via additional practice-oriented publications and newsletters.

## RESULTS

### Descriptive results

After excluding extreme values for our nurse staffing variables and removing observations with missing values for one or more of the control variables, our final sample comprised 28,136 patients ranging from 18 to 97 years of age (average: 61.12 years) who had been discharged from 3,458 distinct hospital units in 1,017 hospitals. 39.2% of the survey participants were female. Table 2 illustrates the distribution of patients and the average response for each of the three dimensions of quality of nursing care across the 24 types of hospital units. Overall, the variation in the distribution of patients across the 24 unit types was large. Almost 50% of the patients had been discharged from general surgery or internal medicine, followed by orthopedics, urology, neurology, trauma surgery, and cardiology, from each of which between six and ten percent of the patients had been discharged. All of the other unit types each accounted for less than three percent of the patients in our sample. In terms of our dependent variable, quality of nursing care, we obtained an average response of 4.33, 3.77, and 3.38 for the three dimensions general nursing care, guidance provided by nurses, and nurse-related patient loyalty to the hospital, respectively, indicating that the perceived quality of nursing care was above the scale average for each. In addition, we found that patient perception of the guidance provided by nurses was, on average, 0.56 scale points lower compared to the general perception of quality of nursing care. We also found that the average responses varied across hospital unit types. For instance, for dimensions one and two, the average responses for patients discharged from internal medicine were 0.24 and 0.46 scale points lower, respectively, compared to orthopedic patients.

For the patient-to-nurse and skill-mix-ratios, we obtained average values of 5.84 patients per nurse and 6.61%, respectively. The patient-to-nurse ratio ranged from 3.77 patients a nurse has to care for in heart surgery to 9.75 in rheumatology. The skill-mix ratio ranged from 3.33% assistant nurses in nuclear medicine to 13.59% assistant nurses in endocrinology (see Appendix 1).

---- include table 2 about here ----

## Regression results

As shown in Table 3, our results indicate that the two nurse staffing variables were significantly related to quality of nursing care. An increase in the patient-to-nurse ratio significantly decreased the general quality of nursing care, the patient perception of nursing guidance, and nurse-related patient loyalty to a given hospital. Additionally, there were significantly positive associations between the squared patient-to-nurse ratio, on the one hand, and the general quality of nursing care, guidance, and patient loyalty, on the other. Hence, the negative effect of the patient-to-nurse ratio is greater when the patient-to-nurse ratio is smaller (in other words, if a nurse already has to care for a lot of patients, one additional patient has a less strong effect on quality perceptions). We illustrate the non-linear relationship in Appendix 2 (for factor 1).

With regard to the skill-mix ratio, we found that an increase in the ratio of assistant nurses to the total number of nurses led to a significant decrease in general quality of nursing care, patient perception of nursing guidance, and patient loyalty. An increase in the patient-to-physician ratio of one additional patient a physician must care for significantly decreased the quality of nursing care dimensions.

---- include table 3 about here ----

The adjusted  $R^2$  measure indicated that our model reduces the error in predicting an individual outcome for our three dimensions of quality of nursing care by between 4.5 and 6.1%.

The regression results of the logit model indicated that an additional patient per nurse decreases the odds of a patient reporting high quality of nursing care. For nurse-related patient loyalty, this effect is significantly non-linear in the same way as in our main model (stated above). Increasing the share of assistant nurses decreases the odds of reporting high quality. An additional patient per physician does not significantly decrease the odds of reporting a high quality of quality of nursing care (see Appendix 3).

When we estimated a random effects model (Appendix 4) and when we replaced the Patient Clinical Complexity Level index with the Elixhauser risk adjustment, our results remained robust.

## Sub group analyses

Differentiating between patients according to their case severity, we found that the mean-centered patient-to-nurse ratio and its square are significantly associated with all three dimensions of patient-

1  
2  
3 perceived quality of nursing care for patients with low case severity, but not for those with high case  
4 severity. The effects of the skill-mix ratio are also only significant for patients with low case severity,  
5 while the effects of the patient-to-physician ratio are slightly larger and only significant for high-case  
6 severity patients (except for general nursing care) (see Appendix 5).  
7  
8  
9

10 When splitting our sample into patients admitted to a hospital with fewer than 500 beds and those  
11 admitted to a hospital with at least 500 beds, we found that an increase in the patient-to-nurse ratio  
12 significantly decreased general nursing care and nurse-related patient loyalty only for patients admitted  
13 to hospitals with fewer than 500 beds. Skill mix significantly affected general nursing care perceptions  
14 and nurse-related patient loyalty in small hospitals only, while it significantly affected the perception of  
15 guidance provided by nurses in small and in large hospitals. Moreover, we found a significant association  
16 between physician staffing and patient-perceived quality of nursing care for patients admitted to larger  
17 hospitals but not for patients admitted to smaller ones (see Appendix 6).  
18  
19  
20  
21  
22  
23

24 Finally, when we divided patients into those admitted to medical or surgical units, we found that the  
25 patient-to-nurse ratio significantly affected perceptions of guidance by nurses and nurse-related patient  
26 loyalty for medical patients only. The associations between the skill mix ratio and quality of nursing care  
27 seem largely unaffected by the sample split. Finally, it shows that medical patients were more sensitive  
28 to physician staffing compared to surgical patients (see Appendix 7).  
29  
30  
31  
32  
33

## 34 DISCUSSION

35 Our results provide important new insights into the relationship between nurse staffing and patient  
36 outcomes, in particular, patient-perceived quality of nursing care. We found that patient-perceived  
37 quality of nursing care significantly decreased as staffing levels, measured using the patient-to-nurse  
38 ratio, decreased. This finding is in line with previous research that has examined the relationship  
39 between nurse staffing levels and general perceived quality of care measures.[15, 16, 19–22, 25, 26, 47–  
40 49] Our study adds to the previously ambiguous evidence in literature by providing insights into the  
41 specific aspects of perceived quality of nursing care that are affected by staffing levels. Evidence on the  
42 perceived quality of guidance provided by nurses has been inconsistent and scarce.[20, 22] Our results,  
43 however, corroborate and extend the findings of Zhu et al. ,[22] who found that higher staffing levels  
44 improved satisfaction with nurses' guidance on medications and medical aids, pain management, and  
45 self-help.[22] With respect to nurse-related patient loyalty, our results confirm the findings of previous  
46 studies that have found that higher nurse staffing levels in hospitals increase the likelihood of patients  
47 generally recommending a hospital to family and friends.[20, 21] Thus, nurse-related patient loyalty  
48  
49  
50  
51  
52  
53  
54  
55  
56  
57  
58  
59  
60

1  
2  
3 seems to be highly related to overall recommendation behavior. In sum, staffing levels affect whether an  
4 adequate amount of time is devoted to caring and providing instructions as well as nurses'  
5 responsiveness to patients' individual needs. Furthermore, nurse staffing levels have direct  
6 consequences for hospitals in terms of patient loyalty. Yet, those effects are not linear; instead, the  
7 negative effects become smaller with rising numbers of patients per nurse. This decreasing marginal  
8 effect of the patient-to-nurse ratio on quality of nursing care with increasing staffing levels is in line with  
9 prior research [15] and seems reasonable: when the ratio is small, each additional patient will  
10 substantially affect the amount of time and the responsiveness of a nurse, thus probably substantially  
11 reducing missed care.[11–13] In contrast, the effect will be lower when a nurse already needs to care for  
12 a high number of (potentially less complex) patients and each additional patient only has a low impact.

13  
14 Our results suggest that the nurses' level of educational attainment, as measured using the skill-mix  
15 ratio, significantly influences patient-perceived quality of nursing care. This finding adds to the few  
16 available studies on the relationship between skill mix and patient-perceived quality of care.[15, 18, 19]  
17 We found strong evidence that a higher proportion of assistant nurses, which means a lower proportion  
18 of professionalization among nursing staff, is negatively associated with all three dimensions of quality of  
19 nursing care. Nurses with lower levels of educational attainment may have less training in interacting  
20 with patients, might work less efficiently and hence have less time per patient, or both. In addition, it is  
21 conceivable that they are less experienced in providing instructions suited to a patient's particular needs  
22 – for example, with regard to medication, pain relief, or the use of medical aids. Any of these factors  
23 could lead to negative perceptions among patients of quality of nursing care and potentially also to an  
24 increased number of adverse events.[8, 17, 50]

25  
26 We found that one additional patient per physician significantly reduced all three dimensions of patient-  
27 perceived quality of nursing care. This is in line with the findings of e.g. West et al.,[51] who found that  
28 both physician and nurse staffing impact intensive care unit patient mortality . However, we found that  
29 the effect sizes for physician staffing were less pronounced compared to those for nurse staffing levels,  
30 indicating that our instrument is more closely related to nurse staffing than to physician staffing. This  
31 result might indicate that patients are not fully capable of differentiating between different occupational  
32 groups when assessing quality of care in hospitals. Another explanation might be that physician staffing  
33 does in fact have an impact on quality of nursing care; if physicians have to care for a large number of  
34 patients, they might omit passing on information which nurses need to adequately care for a patient –  
35 e.g., information on the patients' needs or patient-specific treatment instructions. Additionally, stressed  
36  
37  
38  
39  
40  
41  
42  
43  
44  
45  
46  
47  
48  
49  
50  
51  
52  
53  
54  
55  
56  
57  
58  
59  
60

1  
2  
3 physicians might cause a bad civility climate, which in turn negatively impacts nurses' civility towards  
4 patients.[52, 53]

6  
7 The significant association we observed between the patient-to-nurse ratio and patient-perceived quality  
8 of nursing care was driven mainly by low-severity patients. This stands in contrast to the study of West et  
9 al.,[51] which found that reductions in mortality risks from having more intensive care unit nurses is  
10 larger for patients who are the most severely ill. This might indicate that the effect of nurse staffing  
11 differs across hospital units (in particular, intensive versus non-intensive care) and/or across outcomes  
12 (in that case, patient-perceived quality of care and mortality). Additionally, for low-severity patients, the  
13 share of assistant nurses affects their perceptions of quality of nursing care, while for high-severity  
14 patients, the patient-to-physician ratio affects their perceptions of quality of nursing care. Because high-  
15 severity patients are more dependent on various health professionals and their collaborative  
16 performance, the quality of cooperation and consistency within and across occupational groups might  
17 explain their perceptions of quality of nursing care rather than staffing levels and skill mix.[53] Low-  
18 severity patients might be less relying on different professionals, so that the composition of the nurses,  
19 as expressed in their skill mix, is of greater relevance to them.

20  
21 Similarly, splitting our sample using two separate bed categories reveals that an increase in the patient-  
22 to-nurse ratio decreases patient-perceived quality of nursing care among patients admitted to hospitals  
23 with fewer than 500 beds rather than for patients admitted to hospitals with at least 500 beds. Yet, the  
24 patient-perceived guidance is only significantly affected by staffing levels in large hospitals (significant  
25 non-linear effect). While skill mix significantly affects patient-perceived general nursing care and loyalty  
26 in smaller hospitals only, it significantly relates to guidance in both small and large hospitals. Thus, we  
27 see some variation in how our variables of interest relate to the different quality of nursing care  
28 dimensions. The patient-to-physician ratio in turn only significantly affects patient-perceived quality of  
29 nursing care in large hospitals for all three quality of nursing care dimensions. This might be explained by  
30 a higher proportion of high-severity patients admitted to larger and potentially more highly specialized  
31 hospitals. In addition, in larger hospitals, collaboration across different occupational groups might be of  
32 higher importance than in smaller hospitals.

33  
34 The stronger statistical significance of the relationship between nurse and physician staffing levels and  
35 quality of nursing care for medical patients compared to surgical patients seems plausible, as well. For  
36 nurse staffing, the finding is in line with previous studies that have analyzed the relationship between  
37 nurse staffing levels and patient outcomes based on administrative data and found stronger associations

1  
2  
3 for medical patients.[8] The difference in effects might be explained by surgical patients being healthier  
4 (i.e., as a precondition for being eligible for surgery) and therefore being less dependent on nurses. For  
5 medical patients, the collaboration between professional groups might also be of higher relevance,  
6 which can explain the significant effects of physician staffing.  
7  
8  
9

10 Although our study makes important contributions to understanding the relationship between nurse  
11 staffing and patient outcomes, it is not without important limitations, each of which offers avenues for  
12 further research. First, both of the nurse staffing variables used in our analysis (i.e., patient-to-nurse and  
13 skill-mix ratios) represent annual averages and do not capture day-to-day variations in nurse staffing.  
14 Similarly, even though we were able to consider several variables which are likely related to nurse  
15 staffing and patient outcomes, we might have omitted variable bias from other hospital-unit-related  
16 characteristics, such as the availability and use of technology, the share of temporary or immigrant  
17 nurses, the team climate, or absences due to sickness. These variables were not available in our data  
18 sample but might be associated with nurses' workload and also have an effect on patient outcomes.[27,  
19 53] In addition, the model complexity and the limited sample size drove our choice to conduct subgroup  
20 instead of moderating analyses. Thus, although this study overcomes several endogeneity issues of  
21 previous studies it cannot claim to fully address them. While the large size of our sample may  
22 compensate for some of these issues, future studies may want to draw upon or collect more finely  
23 grained data covering day-to-day variations in nurse staffing variables and should try to account for  
24 further hospital characteristics. In addition, administrative staffing measures have been shown to deviate  
25 from perceived staffing adequacy;[54, 55] therefore, accounting for the latter in relation with quality of  
26 nursing care is a valuable avenue for further research, too. Another limitation this study shares with  
27 previous research is its cross-sectional nature. As the causal order and the generalizability of our results  
28 cannot be verified, future studies would be valuable to investigate the relationships in other settings and  
29 over time. Finally, the PENQuAH instrument has only been tested in Germany and our sample shows  
30 slight variations from the German hospitalized population, which might affect the generalizability of our  
31 results. As it has been able to provide more fine-grained insights into the dimensions of patient-  
32 perceived quality of nursing care, we recommend applying, adapting, and validating it to further data  
33 samples, and adjusting it to the hospital environments of other countries.  
34  
35  
36  
37  
38  
39  
40  
41  
42  
43  
44  
45  
46  
47  
48  
49  
50

51 Our results have important implications for hospital managers and health policy makers pursuing  
52 stronger patient orientation. By providing strong evidence that quality of nursing care is affected by  
53 nurse staffing, we show that nurse staffing decisions are critical for favorable patient care experiences.  
54 We find that in addition to staffing levels, nurses' skill mix is an important factor associated with quality  
55  
56  
57  
58  
59  
60

1  
2  
3  
4  
5  
6  
7  
8  
9  
10  
11  
12  
13  
14  
15  
16  
17  
18  
19  
20  
21  
22  
23  
24  
25  
26  
27  
28  
29  
30  
31  
32  
33  
34  
35  
36  
37  
38  
39  
40  
41  
42  
43  
44  
45  
46  
47  
48  
49  
50  
51  
52  
53  
54  
55  
56  
57  
58  
59  
60

of nursing care. Therefore, we recommend considering nurses' levels of educational attainment, qualifications and specializations when designing policies, such as minimum staffing regulations, to improve nurse staffing in hospitals.

For peer review only



## Tables

|     | Dimension                   | # Items | exemplary items                                                                                                                                                                                                                  | scale                |
|-----|-----------------------------|---------|----------------------------------------------------------------------------------------------------------------------------------------------------------------------------------------------------------------------------------|----------------------|
| (1) | general nursing care        | 13      | <ul style="list-style-type: none"> <li>From my perspective, I always received the necessary care in the hospital.</li> <li>Nursing staff treated me respectfully and courteously.</li> </ul>                                     | 1 (worst) – 5 (best) |
| (2) | guidance provided by nurses | 9       | <ul style="list-style-type: none"> <li>Nursing staff told or showed me how I may and should move.</li> <li>Nursing staff told or showed me how to use my medical aids.</li> </ul>                                                | 1 (worst) – 5 (best) |
| (3) | nurse-related loyalty       | 2       | <ul style="list-style-type: none"> <li>Thinking about the nursing staff, would you select the hospital again?</li> <li>Thinking about the nursing staff, would you recommend the hospital to your friends and family?</li> </ul> | 1 (worst) – 4 (best) |

**Table 1: Overview on dimensions of Patients' Experience of Nursing Quality in Acute Hospitals (PENQuAH) instrument**

| unit type          | Patients      | hospital units | (1) general nursing care <sup>1</sup> | (2) guidance <sup>2</sup> | (3) loyalty <sup>3</sup> |
|--------------------|---------------|----------------|---------------------------------------|---------------------------|--------------------------|
| Internal medicine  | 6,260         | 732            | 4.22 (0.81)                           | 3.56 (1.19)               | 3.25 (0.84)              |
| Geriatrics         | 106           | 60             | 3.76 (1.05)                           | 3.34 (1.14)               | 2.90 (0.99)              |
| Cardiology         | 1,698         | 150            | 4.34 (0.74)                           | 3.71 (1.13)               | 3.37 (0.76)              |
| Nephrology         | 61            | 21             | 4.19 (0.85)                           | 3.62 (1.09)               | 3.27 (0.83)              |
| Hematology         | 181           | 66             | 4.37 (0.77)                           | 3.71 (1.17)               | 3.47 (0.73)              |
| Endocrinology      | 22            | 5              | 4.29 (0.70)                           | 3.65 (1.24)               | 3.27 (0.69)              |
| Gastroenterology   | 378           | 73             | 4.08 (0.90)                           | 3.37 (1.21)               | 3.13 (0.90)              |
| Pneumology         | 200           | 35             | 4.27 (0.81)                           | 3.70 (1.24)               | 3.39 (0.78)              |
| Rheumatology       | 121           | 14             | 4.34 (0.80)                           | 3.57 (1.25)               | 3.38 (0.79)              |
| Pulmonary medicine | 77            | 12             | 4.36 (0.74)                           | 3.74 (1.20)               | 3.45 (0.70)              |
| General surgery    | 7,512         | 771            | 4.37 (0.75)                           | 3.87 (1.07)               | 3.43 (0.75)              |
| Trauma surgery     | 1,784         | 234            | 4.26 (0.79)                           | 3.73 (1.10)               | 3.28 (0.81)              |
| Neurosurgery       | 582           | 104            | 4.28 (0.77)                           | 3.65 (1.10)               | 3.39 (0.79)              |
| Vascular surgery   | 300           | 86             | 4.39 (0.75)                           | 3.87 (1.12)               | 3.45 (0.73)              |
| Plastics surgery   | 186           | 45             | 4.31 (0.75)                           | 3.79 (1.15)               | 3.41 (0.78)              |
| Thoracic surgery   | 81            | 22             | 4.47 (0.73)                           | 4.09 (1.04)               | 3.56 (0.73)              |
| Heart surgery      | 319           | 54             | 4.36 (0.74)                           | 3.90 (0.96)               | 3.46 (0.72)              |
| Urology            | 2,396         | 295            | 4.44 (0.66)                           | 3.93 (1.03)               | 3.46 (0.70)              |
| Orthopedics        | 2,753         | 226            | 4.46 (0.68)                           | 4.02 (0.99)               | 3.57 (0.68)              |
| Neurology          | 1,951         | 275            | 4.28 (0.77)                           | 3.61 (1.17)               | 3.30 (0.80)              |
| Nuclear medicine   | 103           | 36             | 4.56 (0.63)                           | 4.20 (0.94)               | 3.51 (0.71)              |
| Radiotherapy       | 53            | 23             | 4.49 (0.61)                           | 4.02 (0.88)               | 3.45 (0.70)              |
| Dermatology        | 760           | 63             | 4.40 (0.69)                           | 3.93 (1.06)               | 3.43 (0.73)              |
| Dentistry          | 252           | 56             | 4.12 (0.84)                           | 3.68 (1.11)               | 3.18 (0.88)              |
| <b>Total</b>       | <b>28,136</b> | <b>3,458</b>   | <b>4.33 (0.76)</b>                    | <b>3.77 (1.12)</b>        | <b>3.38 (0.78)</b>       |

**Table 2: Quality of nursing care across unit types**

<sup>1</sup> Mean response for general nursing care, measured on a scale of one to five, with five representing the best care. Standard deviation in parentheses.

<sup>2</sup> Mean response for guidance provided by nurses, measured on a scale of one to five, with five representing the best guidance.

<sup>3</sup> Mean response for patient loyalty to the hospital, measured on a scale of one to four, with four representing the highest loyalty.

| effect <sup>†</sup>       | (1) general nursing care           | (2) guidance                       | (3) loyalty                        |
|---------------------------|------------------------------------|------------------------------------|------------------------------------|
| $\widetilde{PTN}$         | -0.020 [0.002]<br>(-0.033;-0.008)  | -0.023 [0.018]<br>(-0.041;-0.004)  | -0.025 [<0.001]<br>(-0.038;-0.012) |
| $\widetilde{PTN}^2$       | 0.001 [0.003]<br>(0.000;0.002)     | 0.001 [0.030]<br>(0.000;0.002)     | 0.001 [0.002]<br>(0.000;0.002)     |
| $\widetilde{skill}$       | -0.003 [<0.001]<br>(-0.004;-0.001) | -0.005 [<0.001]<br>(-0.007;-0.003) | -0.003 [<0.001]<br>(-0.005;-0.002) |
| PCCL                      | -0.048 [<0.001]<br>(-0.057;-0.040) | -0.034 [<0.001]<br>(-0.047;-0.022) | -0.028 [<0.001]<br>(-0.037;-0.019) |
| age                       | 0.021 [<0.001]<br>(0.018;0.025)    | 0.018 [<0.001]<br>(0.013;0.023)    | 0.018 [<0.001]<br>(0.014;0.021)    |
| age <sup>2</sup>          | 0.000 [<0.001]<br>(0.000;0.000)    | 0.000 [<0.001]<br>(0.000;0.000)    | 0.000 [<0.001]<br>(0.000;0.000)    |
| gender<br>(= 1 if female) | -0.192 [<0.001]<br>(-0.210;-0.173) | -0.276 [<0.001]<br>(-0.303;-0.249) | -0.140 [<0.001]<br>(-0.159;-0.121) |
| rurality                  | 0.014 [0.004]<br>(0.004;0.024)     | 0.028 [<0.001]<br>(0.014;0.042)    | 0.004 [0.382]<br>(-0.005;0.014)    |
| $\widetilde{PTP}$         | -0.002 [0.030]<br>(-0.003;0.000)   | -0.002 [0.026]<br>(-0.005;0.000)   | -0.002 [0.013]<br>(-0.003;0.000)   |
| adj. R <sup>2</sup>       | <b>0.061</b>                       | <b>0.055</b>                       | <b>0.045</b>                       |
| observations              | <b>28,136</b>                      | <b>28,136</b>                      | <b>28,136</b>                      |

**Table 3: Regression results**

P-values in square brackets, 95%-confidence intervals in parentheses

Abbreviations:  $\widetilde{PTN}$ : mean-centered patient-to-nurse ratio;  $\widetilde{skill}$ : mean-centered skill-mix ratio; PCCL: Patient Clinical Complexity Level index;  $\widetilde{PTP}$ : mean-centered patient-to-physician ratio

†Fixed effects for the 24 unit types, months, and bed categories and between-unit effects for patient-to-nurse and skill mix included but not shown.

## Funding

This material is based upon work supported by the Innovation Fund of the German Federal Joint Committee, P.O. Box 12 06 06, Berlin, Germany (01VSF17038).

## Competing/Conflicting interests

The authors declare that they have no competing or conflicting interests.

## Author statement

JS and VW have originally designed the study. KD and US have acquired and analyzed the data. JS, KD, and VW have interpreted the data. KD and VW have drafted the article and JS and US have critically revised it. All authors undertake to give final approval of the version to be published and agree to be accountable for all aspects of the work. No further writing assistance other than basic copy-editing has been provided.

## Ethical approval and informed consent

A declaration of compliance with terms of use and ethical standards from the University of Hamburg's WiSo Laboratories was obtained on January 15th, 2019 (no approval number provided). Information and consent of the survey participants were conducted in written form prior to survey participation. A copy of the written form of Informed Consent, Privacy and Confidentiality was handed out to the subjects. A further copy was provided for the archive of the WiSo Laboratories.

## Data availability statement

The data are in large parts owned by a German statutory health insurer, the Techniker Krankenkasse. To fulfill the legal requirements to obtain the data, researchers must obtain permission for a specific research question from the German Federal (Social) Insurance Office. Additionally, researchers must conclude a contract with the statutory health insurer regarding data access.

## REFERENCES

- 1 Kane RL, Shamliyan TA, Mueller C, et al. The association of registered nurse staffing levels and patient outcomes. *Med Care* 2007;45(12):1195–204.
- 2 Driscoll A, Grant MJ, Carroll D, et al. The effect of nurse-to-patient ratios on nurse-sensitive patient outcomes in acute specialist units: A systematic review and meta-analysis. *Eur J Cardiovasc Nurs* 2018;17(1):6–22.
- 3 Blume K, Dietermann K, Kirchner-Heklau U, et al. Staffing levels and nurse sensitive patient outcomes: Umbrella review and qualitative study. *Health Serv Res* 2021;00:1-23. DOI: 10.1111/1475-6773.13647.
- 4 Cook A, Gaynor M, Stephens M, et al. The effect of a hospital nurse staffing mandate on patient health outcomes: Evidence from California's minimum staffing regulation. *J Health Econ* 2012;31(2):340–48.
- 5 Blegen MA, Goode CJ, Spetz J, et al. Nurse staffing effects on patient outcomes: safety-net and non-safety-net hospitals. *Med Care* 2011;49(4):406–14.
- 6 Aiken LH, Clarke SP, Sloane DM, et al. Hospital nurse staffing and patient mortality, nurse burnout, and job dissatisfaction. *JAMA* 2002;288(16):1987–93.
- 7 Needleman J, Buerhaus P, Pankratz VS, et al. Nurse staffing and inpatient hospital mortality. *N Engl J Med* 2011;364(11):1037–45.
- 8 Needleman J, Buerhaus P, Mattke S, et al. Nurse-staffing levels and the quality of care in hospitals. *N Engl J Med* 2002;346(22):1715–22.
- 9 Stalpers D, De Brouwer BJ, Kaljouw MJ, et al. Associations between characteristics of the nurse work environment and five nurse-sensitive patient outcomes in hospitals: a systematic review of literature. *Int J Nurs Stud* 2015;52(4):817–35.
- 10 Leary A, Cook R, Jones S, et al. Mining routinely collected acute data to reveal non-linear relationships between nurse staffing levels and outcomes. *BMJ Open* 2016;6(12):e011177. doi:10.1136/bmjopen-2016-011177 [published Online First: 16 December 2016].
- 11 Aiken LH, Sloane DM, Ball J, et al. Patient satisfaction with hospital care and nurses in England: an observational study. *BMJ Open* 2018;8(1):e019189.
- 12 Redfern OC, Griffiths P, Maruotti A, et al. The association between nurse staffing levels and the timeliness of vital signs monitoring: a retrospective observational study in the UK. *BMJ Open* 2019;9(9):e032157.
- 13 Kalisch BJ, Tschannen D, Lee KH. Missed nursing care, staffing, and patient falls. *J Nurs Care Qual* 2012;27(1):6–12.
- 14 Rittenhouse DR, Shortell SM, Fisher ES. Primary care and accountable care—two essential elements of delivery-system reform. *New England Journal of Medicine* 2009;361(24):2301–03.
- 15 Opiel E-M, Young GJ. Nurse Staffing Patterns and Patient Experience of Care: An Empirical Analysis of U.S. Hospitals. *Health Serv Res* 2018;53(3):1799–818.
- 16 Martsof GR, Gibson TB, Benevent R, et al. An Examination of Hospital Nurse Staffing and Patient Experience with Care: Differences between Cross-Sectional and Longitudinal Estimates. *Health Serv Res* 2016;51(6):2221–41.
- 17 Aiken LH, Sloane D, Griffiths P, et al. Nursing skill mix in European hospitals: cross-sectional study of the association with mortality, patient ratings, and quality of care. *BMJ Qual Saf* 2017;26(7):559–68.

- 1  
2  
3 18 Hall LM, Doran D, Baker GR, et al. Nurse Staffing Models as Predictors of Patient Outcomes. *Med Care*  
4 2003.  
5  
6 19 Potter P, Barr N, McSweeney M, et al. Identifying nurse staffing and patient outcome relationships: a  
7 guide for change in care delivery. *Nurs Econ* 2003;21(4):158–66.  
8  
9 20 Kutney-Lee A, McHugh MD, Sloane DM, et al. Nursing: a key to patient satisfaction. *Health Aff.*  
10 2009;28(4):w669-77.  
11  
12 21 Aiken LH, Sermeus W, van den Heede K, et al. Patient safety, satisfaction, and quality of hospital care:  
13 cross sectional surveys of nurses and patients in 12 countries in Europe and the United States. *BMJ*  
14 2012;344:e1717.  
15  
16 22 Zhu XW, You LM, Zheng J, et al. Nurse staffing levels make a difference on patient outcomes: a  
17 multisite study in Chinese hospitals. *J Nurs Scholarsh* 2012;44(3):266–73.  
18  
19 23 Papastavrou E, Efstathiou G, Charalambous A. Nurses' and patients' perceptions of caring behaviours:  
20 quantitative systematic review of comparative studies. *J Adv Nurs* 2011;67(6):1191–205.  
21  
22 24 Ausserhofer D, Schubert M, Desmedt M, et al. The association of patient safety climate and nurse-  
23 related organizational factors with selected patient outcomes: a cross-sectional survey. *Int J Nurs*  
24 *Stud* 2013;50(2):240–52.  
25  
26 25 Ball JE, Murrells T, Rafferty AM, et al. 'Care left undone' during nursing shifts: associations with  
27 workload and perceived quality of care. *BMJ Qual Saf* 2014;23(2):116–25.  
28  
29 26 Cho S-H, Mark BA, Knaf G, et al. Relationships between nurse staffing and patients' experiences, and  
30 the mediating effects of missed nursing care. *J Nurs Scholarsh* 2017;49(3):347–55.  
31  
32 27 Griffiths P, Ball J, Drennan J, et al. Nurse staffing and patient outcomes: strengths and limitations of  
33 the evidence to inform policy and practice. A review and discussion paper based on evidence  
34 reviewed for the National Institute for Health and Care Excellence Safe Staffing guideline  
35 development. *Int J Nurs Stud* 2016;63:213–25.  
36  
37 28 Cho SH, Ketefian S, Barkauskas VH, et al. The effects of nurse staffing on adverse events, morbidity,  
38 mortality, and medical costs. *Nurs Res* 2003;52(2):71–79.  
39  
40 29 Kim CG, Bae KS. Relationship between nurse staffing level and adult nursing-sensitive outcomes in  
41 tertiary hospitals of Korea: retrospective observational study. *Int J Nurs Stud* 2018;80:155–64.  
42  
43 30 Weiss ME, Yakusheva O, Bobay KL. Quality and cost analysis of nurse staffing, discharge preparation,  
44 and postdischarge utilization. *Health Serv Res* 2011;46(5):1473–94.  
45  
46 31 Twigg DE, Duffield C, Bremner A, et al. The impact of the nursing hours per patient day (NHPPD)  
47 staffing method on patient outcomes: a retrospective analysis of patient and staffing data. *Int J*  
48 *Nurs Stud* 2011;48(5):540–48.  
49  
50 32 Yakusheva O, Lindrooth R, Weiss M. Economic Evaluation of the 80% Baccalaureate Nurse Workforce  
51 Recommendation: A Patient-level Analysis. *Olga Yakusheva, Richard Lindrooth and Marianne Weiss*  
52 *Medical Care* 2014;52(10):864–69.  
53  
54 33 Keers RN, Williams SD, Cooke J, et al. Understanding the causes of intravenous medication  
55 administration errors in hospitals: a qualitative critical incident study. *BMJ Open*  
56 2015;5(3):e005948.  
57  
58 34 Lake ET, Shang J, Klaus S, et al. Patient falls: association with hospital Magnet status and nursing unit  
59 staffing. *Res Nurs Health* 2010;33(5):413–25.  
60  
61 35 Dunton N, Gajewski B, Taunton RL, et al. Nurse staffing and patient falls on acute care hospital units.  
62 *Nurs Outlook* 2004;52(1):53–59.  
63  
64 36 Duffield C, Diers D, O'Brien-Pallas L, et al. Nursing staffing, nursing workload, the work environment  
65 and patient outcomes. *Appl Nurs Res* 2011;24(4):244–55.

- 1  
2  
3 37 van den Heede K, Lesaffre E, Diya L, et al. The relationship between inpatient cardiac surgery  
4 mortality and nurse numbers and educational level: analysis of administrative data. *Int J Nurs Stud*  
5 2009b;46(6):796–803.  
6  
7 38 Sales A, Sharp N, Li YF, et al. The association between nursing factors and patient mortality in the  
8 Veterans Health Administration: the view from the nursing unit level. *Med Care* 2008;46(9):938–45.  
9 39 Brubakk K, Svendsen MV, Hofoss D, et al. Associations between work satisfaction, engagement and 7-  
10 day patient mortality: a cross-sectional survey. *BMJ Open* 2019;9(12):e031704.  
11 40 Diya L, van den Heede K, Sermeus W, et al. The relationship between in-hospital mortality,  
12 readmission into the intensive care nursing unit and/or operating theatre and nurse staffing levels.  
13 *J Adv Nurs* 2012;68(5):1073–81.  
14 41 Rafferty AM, Clarke SP, Coles J, et al. Outcomes of variation in hospital nurse staffing in English  
15 hospitals: cross-sectional analysis of survey data and discharge records. *Int J Nurs Stud*  
16 2007;44(2):175–82.  
17 42 Dietermann K, Winter V, Schneider U, et al. The impact of nurse staffing levels on nursing-sensitive  
18 patient outcomes: A multilevel regression approach. *European Journal of Health Economics*  
19 2021;online first. DOI: 10.1007/s10198-021-01292-2.  
20 43 Blume K, Kirchner-Heklau U, Winter V, et al. Construction and validation of a scale to measure the  
21 quality of nurse delivered care in acute care settings. *Working Paper* 2021.  
22 44 National Office of Statistics. Gesundheit: Grunddaten der Krankenhäuser 2017 (Basic data of hospitals  
23 of the year 2017). Wiesbaden: Statistisches Bundesamt (Destatis) 2018.  
24 45 InEK GmbH. G-DRG German diagnosis related groups: Version 2019. Definitionshandbuch, Band 5,  
25 Anhang C. Siegburg 2018.  
26 46 Elixhauser A, Steiner C, Harris DR, et al. Comorbidity measures for use with administrative data. *Med*  
27 *Care* 1998;36(1):8–27.  
28 47 Cho SH, Yun SC. Bed-to-nurse ratios, provision of basic nursing care, and in-hospital and 30-day  
29 mortality among acute stroke patients admitted to an intensive care unit: cross-sectional analysis  
30 of survey and administrative data. *Int J Nurs Stud* 2009;46(8):1092–101.  
31 48 O'Brien-Pallas L, Li XM, Wang S, et al. Evaluation of a patient care delivery model: system outcomes in  
32 acute cardiac care. *Can J Nurs Res* 2010;42(4):98–120.  
33 49 Sochalski J. Is more better?: the relationship between nurse staffing and the quality of nursing care in  
34 hospitals. *Med Care* 2004;42:II67-II73.  
35 50 Needleman J, Buerhaus PI, Stewart M, et al. Nurse staffing in hospitals: is there a business case for  
36 quality? *Health Aff.* 2006;25(1):204–11.  
37 51 West E, Barron DN, Harrison D, et al. Nurse staffing, medical staffing and mortality in intensive care:  
38 an observational study. *Int J Nurs Stud* 2014;51(5):781–94.  
39 52 Oppel E-M, Mohr DC. "Paying it forward": The link between providers' civility climate, civility toward  
40 patients and patient experience outcomes. *Health Care Manage Rev* 2020;45(2):141–50.  
41 53 van Bogaert P, Timmermans O, Weeks SM, et al. Nursing unit teams matter: impact of unit-level nurse  
42 practice environment, nurse work characteristics, and burnout on nurse reported job outcomes,  
43 and quality of care, and patient adverse events—a cross-sectional survey. *Int J Nurs Stud*  
44 2014;51(8):1123–34.  
45 54 Choi J, Staggs VS. Comparability of nurse staffing measures in examining the relationship between RN  
46 staffing and unit-acquired pressure ulcers: a unit-level descriptive, correlational study. *Int J Nurs*  
47 *Stud* 2014;51(10):1344–52.  
48  
49  
50  
51  
52  
53  
54  
55  
56  
57  
58  
59  
60

1  
2  
3 55 Winter V, Schreyögg J, Thiel A. Hospital staff shortages: Environmental and organizational  
4 determinants and implications for patient satisfaction. *Health Policy* 2020;124(4):380–88.  
5  
6  
7  
8  
9  
10  
11  
12  
13  
14  
15  
16  
17  
18  
19  
20  
21  
22  
23  
24  
25  
26  
27  
28  
29  
30  
31  
32  
33  
34  
35  
36  
37  
38  
39  
40  
41  
42  
43  
44  
45  
46  
47  
48  
49  
50  
51  
52  
53  
54  
55  
56  
57  
58  
59  
60

For peer review only

## Appendix: Nurse staffing and patient-perceived quality of nursing care: A cross-sectional analysis of survey and administrative data in German hospitals

### Appendix 1: Mean PTN ratio and skill mix ratio per unit type

| unit type          | patients      | patient-to nurse ratio (mean) | skill mix ratio (mean) |
|--------------------|---------------|-------------------------------|------------------------|
| internal medicine  | 6,260         | 5.92                          | 7.54                   |
| geriatrics         | 106           | 8.75                          | 11.91                  |
| cardiology         | 1,698         | 4.68                          | 5.85                   |
| nephrology         | 61            | 4.78                          | 4.70                   |
| hematology         | 181           | 5.31                          | 5.56                   |
| endocrinology      | 22            | 8.41                          | 13.59                  |
| gastroenterology   | 378           | 6.20                          | 8.30                   |
| pneumology         | 200           | 4.91                          | 7.68                   |
| rheumatology       | 121           | 9.75                          | 9.71                   |
| pulmonary medicine | 77            | 6.16                          | 6.14                   |
| general surgery    | 7,512         | 5.87                          | 6.59                   |
| trauma surgery     | 1,784         | 6.50                          | 7.14                   |
| neurosurgery       | 582           | 5.90                          | 5.64                   |
| vascular surgery   | 300           | 5.76                          | 4.98                   |
| plastic surgery    | 186           | 5.01                          | 4.30                   |
| thoracic surgery   | 81            | 5.25                          | 6.44                   |
| heart surgery      | 319           | 3.77                          | 5.08                   |
| urology            | 2,396         | 6.27                          | 5.45                   |
| orthopedics        | 2,753         | 6.05                          | 6.94                   |
| neurology          | 1,951         | 5.36                          | 6.26                   |
| nuclear medicine   | 103           | 4.26                          | 3.33                   |
| radiotherapy       | 53            | 5.32                          | 5.27                   |
| dermatology        | 760           | 5.93                          | 4.87                   |
| dentistry          | 252           | 4.85                          | 4.41                   |
| <b>total</b>       | <b>28,136</b> | <b>5.84</b>                   | <b>6.61</b>            |

### Appendix 2 Illustration: Effect of an additional patient per nurse on QoNC factor 1 (ceteris paribus)



**Note:** the green area illustrates the distribution (histogram) of the PTN ratio and indicates the quantity of data points to substantiate the estimation depending on the PTN ratio.



Nurse staffing and patient-perceived quality of nursing care

Appendix 3: Regression results generalized random intercept model (odds ratios)

| effect <sup>†</sup>       | (1) general nursing care            | (2) guidance                        | (3) loyalty                         |
|---------------------------|-------------------------------------|-------------------------------------|-------------------------------------|
| $\overline{PTN}$          | 0.951 [0.010]<br>(0.915;0.988)      | 0.943 [0.010]<br>(0.902;0.986)      | 0.929 [ $<0.001$ ]<br>(0.897;0.963) |
| $\overline{PTN}^2$        | 1.003 [0.035]<br>(1.000;1.005)      | 1.003 [0.035]<br>(1.001;1.006)      | 1.004 [0.001]<br>(1.002;1.006)      |
| $\overline{skill}$        | 0.995 [0.050]<br>(0.991;1.000)      | 0.997 [0.050]<br>(0.991;1.002)      | 0.991 [ $<0.001$ ]<br>(0.986;0.995) |
| PCCL                      | 0.876 [ $<0.001$ ]<br>(0.851;0.900) | 0.875 [ $<0.001$ ]<br>(0.846;0.906) | 0.944 [ $<0.001$ ]<br>(0.922;0.967) |
| age                       | 1.080 [ $<0.001$ ]<br>(1.066;1.094) | 1.061 [ $<0.001$ ]<br>(1.045;1.077) | 1.034 [ $<0.001$ ]<br>(1.024;1.045) |
| age <sup>2</sup>          | 0.999 [ $<0.001$ ]<br>(0.999;1.000) | 1.000 [ $<0.001$ ]<br>(0.999;1.000) | 1.000 [ $<0.001$ ]<br>(1.000;1.000) |
| gender<br>(= 1 if female) | 0.903 [ $<0.001$ ]<br>(0.854;0.955) | 0.934 [ $<0.001$ ]<br>(0.874;0.999) | 0.822 [ $<0.001$ ]<br>(0.781;0.865) |
| rurality                  | 1.060 [ $<0.001$ ]<br>(1.029;1.091) | 1.025 [ $<0.001$ ]<br>(0.991;1.062) | 1.010 [0.463]<br>(0.984;1.037)      |
| $\overline{PTP}$          | 0.997 [0.278]<br>(0.992;1.002)      | 0.998 [0.278]<br>(0.992;1.004)      | 0.997 [0.140]<br>(0.993;1.001)      |
| observations              | 28,136                              | 28,136                              | 28,136                              |

P-values in square brackets, 95%-confidence intervals in parentheses

Abbreviations:  $\overline{PTN}$ : mean-centered patient-to-nurse ratio;  $\overline{skill}$ : mean-centered skill-mix ratio; PCCL: Patient Clinical Complexity Level index

†Fixed effects for the 24 unit types, months, bed categories and between-unit effects for PTN and skill mix included but not shown.

Appendix 4: Regression results random effects model

| effect <sup>†</sup>       | (1) general nursing care               | (2) guidance                           | (3) loyalty                            |
|---------------------------|----------------------------------------|----------------------------------------|----------------------------------------|
| $\overline{PTN}$          | -0.006 [0.009]<br>(-0.011;-0.002)      | -0.007 [0.045]<br>(-0.014;0.000)       | -0.010 [ $<0.001$ ]<br>(-0.015;-0.005) |
| $\overline{PTN}^2$        | 0.001 [0.003]<br>(0.000;0.002)         | 0.001 [0.037]<br>(0.000;0.002)         | 0.001 [0.003]<br>(0.000;0.002)         |
| $\overline{skill}$        | -0.003 [ $<0.001$ ]<br>(-0.004;-0.001) | -0.005 [ $<0.001$ ]<br>(-0.007;-0.003) | -0.003 [ $<0.001$ ]<br>(-0.005;-0.002) |
| PCCL                      | -0.048 [ $<0.001$ ]<br>(-0.057;-0.039) | -0.034 [ $<0.001$ ]<br>(-0.047;-0.022) | -0.027 [ $<0.001$ ]<br>(-0.036;-0.018) |
| age                       | 0.022 [ $<0.001$ ]<br>(0.018;0.025)    | 0.018 [ $<0.001$ ]<br>(0.013;0.023)    | 0.018 [ $<0.001$ ]<br>(0.014;0.022)    |
| age <sup>2</sup>          | 0.000 [ $<0.001$ ]<br>(0.000;0.000)    | 0.000 [ $<0.001$ ]<br>(0.000;0.000)    | 0.000 [ $<0.001$ ]<br>(0.000;0.000)    |
| gender<br>(= 1 if female) | -0.192 [ $<0.001$ ]<br>(-0.210;-0.174) | -0.276 [ $<0.001$ ]<br>(-0.303;-0.249) | -0.140 [ $<0.001$ ]<br>(-0.159;-0.121) |
| rurality                  | 0.014 [0.004]<br>(0.004;0.024)         | 0.028 [ $<0.001$ ]<br>(0.014;0.042)    | 0.004 [0.373]<br>(-0.005;0.014)        |
| $\overline{PTP}$          | -0.002 [0.030]<br>(-0.003;0.000)       | -0.003 [0.026]<br>(-0.005;0.000)       | -0.002 [0.013]<br>(-0.003;0.000)       |
| observations              | 28,136                                 | 28,136                                 | 28,136                                 |

P-values in square brackets, 95%-confidence intervals in parentheses

Abbreviations:  $\overline{PTN}$ : mean-centered patient-to-nurse ratio;  $\overline{skill}$ : mean-centered skill-mix ratio; PCCL: Patient Clinical Complexity Level index

†Fixed effects for the 24 unit types, months, bed categories and between-unit effects for PTN and skill mix included but not shown.

## Nurse staffing and patient-perceived quality of nursing care

## Appendix 5: Regression results subgroup analysis case severity

| effect <sup>†</sup>       | (1) general nursing care          |                                   | (2) guidance                      |                                   | (3) loyalty                       |                                   |
|---------------------------|-----------------------------------|-----------------------------------|-----------------------------------|-----------------------------------|-----------------------------------|-----------------------------------|
|                           | low (PCCL=0)                      | high (PCCL>0) <sup>††</sup>       | low (PCCL=0)                      | high (PCCL>0) <sup>††</sup>       | low (PCCL=0)                      | high (PCCL>0) <sup>††</sup>       |
| $\overline{PTN}$          | -0.019 [0.009]<br>(-0.033;-0.005) | -0.022 [0.121]<br>(-0.051;-0.003) | -0.021 [0.051]<br>(-0.043;0.000)  | -0.024 [0.245]<br>(-0.063;0.016)  | -0.025 [0.001]<br>(-0.040;-0.010) | -0.022 [0.142]<br>(-0.050;-0.007) |
| $\overline{PTN}^2$        | 0.001 [0.009]<br>(0.000;0.002)    | 0.001 [0.222]<br>(-0.001;0.003)   | 0.001 [0.066]<br>(0.0000;0.003)   | 0.001 [0.312]<br>(-0.001;0.004)   | 0.001 [0.004]<br>(0.000;0.002)    | 0.001 [0.375]<br>(-0.001;0.003)   |
| $\overline{skill}$        | -0.003 [0.001]<br>(-0.005;-0.001) | -0.003 [0.070]<br>(-0.006;0.000)  | -0.005 [0.001]<br>(-0.008;-0.003) | -0.004 [0.079]<br>(-0.008;0.000)  | -0.004 [0.001]<br>(-0.005;-0.002) | -0.003 [0.059]<br>(-0.006;0.000)  |
| PCCL                      | —                                 | -0.038 [0.001]<br>(-0.055;-0.021) | —                                 | -0.008 [0.505]<br>(-0.032;0.016)  | —                                 | -0.021 [0.017]<br>(-0.038;-0.004) |
| age                       | 0.018 [0.001]<br>(0.014;0.022)    | 0.030 [0.001]<br>(0.022;0.038)    | 0.015 [0.001]<br>(0.009;0.021)    | 0.022 [0.001]<br>(0.011;0.033)    | 0.015 [0.001]<br>(0.011;0.019)    | 0.022 [0.001]<br>(0.014;0.030)    |
| age <sup>2</sup>          | 0.000 [0.001]<br>(0.000;0.000)    | 0.000 [0.001]<br>(0.000;0.000)    | 0.000 [0.024]<br>(0.000;0.000)    | 0.000 [0.001]<br>(0.000;0.000)    | 0.000 [0.001]<br>(0.000;0.000)    | 0.000 [0.001]<br>(0.000;0.000)    |
| gender<br>(= 1 if female) | -0.190 [0.001]<br>(-0.211;-0.169) | -0.193 [0.004]<br>(-0.231;-0.154) | -0.283 [0.001]<br>(-0.315;-0.252) | -0.252 [0.001]<br>(-0.306;-0.198) | -0.142 [0.001]<br>(-0.164;-0.120) | -0.128 [0.001]<br>(-0.167;-0.089) |
| rurality                  | 0.009 [0.125]<br>(-0.002;0.020)   | 0.029 [0.004]<br>(0.009;0.048)    | 0.021 [0.015]<br>(0.004;0.037)    | 0.050 [0.001]<br>(0.023;0.077)    | -0.001 [0.848]<br>(-0.013;0.010)  | 0.020 [0.050]<br>(0.000;0.039)    |
| $\overline{PTP}$          | -0.001 [0.175]<br>(-0.003;0.001)  | -0.003 [0.073]<br>(-0.006;0.000)  | -0.002 [0.226]<br>(-0.004;0.001)  | -0.005 [0.027]<br>(-0.010;-0.001) | -0.001 [0.120]<br>(-0.003;0.000)  | -0.003 [0.039]<br>(-0.007;0.000)  |
| observations              | 20,624                            | 7,512                             | 20,624                            | 7,512                             | 20,624                            | 7,512                             |

P-values in square brackets, 95%-confidence intervals in parentheses

Abbreviations:  $\overline{PTN}$ : mean-centered patient-to-nurse ratio;  $\overline{skill}$ : mean-centered skill-mix ratio; PCCL: Patient Clinical Complexity Level index

<sup>†</sup>Fixed effects for the 24 unit types, months, bed categories and between-unit effects for PTN and skill mix included but not shown.

<sup>††</sup> Subgroup "high" comprises patients with a PCCL from 1 to 6.

Appendix 6: Regression results subgroup analysis hospital size<sup>††</sup>

| effect <sup>†</sup>       | (1) general nursing care          |                                   | (2) guidance                      |                                   | (3) loyalty                       |                                   |
|---------------------------|-----------------------------------|-----------------------------------|-----------------------------------|-----------------------------------|-----------------------------------|-----------------------------------|
|                           | small                             | large                             | small                             | large                             | small                             | large                             |
| $\overline{PTN}$          | -0.018 [0.024]<br>(-0.034;-0.002) | -0.015 [0.186]<br>(-0.037;0.007)  | -0.009 [0.447]<br>(-0.033;-0.015) | -0.031 [0.058]<br>(-0.063;0.001)  | -0.024 [0.005]<br>(-0.040;-0.007) | -0.014 [0.216]<br>(-0.037;0.008)  |
| $\overline{PTN}^2$        | 0.001 [0.048]<br>(0.000;0.002)    | 0.001 [0.155]<br>(0.000;0.002)    | 0.000 [0.660]<br>(-0.001;0.002)   | 0.002 [0.041]<br>(0.000;0.004)    | 0.001 [0.035]<br>(0.000;0.002)    | 0.001 [0.245]<br>(-0.001;0.002)   |
| $\overline{skill}$        | -0.004 [0.001]<br>(-0.006;-0.002) | -0.002 [0.183]<br>(-0.004;0.001)  | -0.005 [0.002]<br>(-0.008;-0.002) | -0.004 [0.009]<br>(-0.008;-0.001) | -0.005 [0.001]<br>(-0.007;-0.003) | -0.001 [0.369]<br>(-0.003;0.001)  |
| PCCL                      | -0.050 [0.001]<br>(-0.062;-0.037) | -0.046 [0.001]<br>(-0.058;-0.035) | -0.043 [0.001]<br>(-0.062;-0.024) | -0.028 [0.002]<br>(-0.045;-0.011) | -0.034 [0.001]<br>(-0.047;-0.021) | -0.022 [0.001]<br>(-0.035;-0.010) |
| age                       | 0.026 [0.001]<br>(0.021;0.030)    | 0.017 [0.001]<br>(0.012;0.022)    | 0.023 [0.001]<br>(0.016;0.030)    | 0.012 [0.002]<br>(0.004;0.019)    | 0.022 [0.001]<br>(0.017;0.027)    | 0.013 [0.001]<br>(0.008;0.018)    |
| age <sup>2</sup>          | 0.000 [0.001]<br>(0.000;0.000)    | 0.000 [0.001]<br>(0.000;0.000)    | 0.000 [0.001]<br>(0.000;0.000)    | 0.000 [0.097]<br>(0.000;0.000)    | 0.000 [0.001]<br>(0.000;0.000)    | 0.000 [0.002]<br>(0.000;0.000)    |
| gender<br>(= 1 if female) | -0.165 [0.001]<br>(-0.189;-0.140) | -0.223 [0.001]<br>(-0.251;-0.195) | -0.245 [0.001]<br>(-0.282;-0.208) | -0.311 [0.001]<br>(-0.351;-0.271) | -0.116 [0.001]<br>(-0.141;-0.090) | -0.166 [0.001]<br>(-0.195;-0.138) |
| rurality                  | 0.010 [0.148]<br>(0.003;0.023)    | 0.020 [0.006]<br>(0.006;0.034)    | 0.033 [0.001]<br>(0.013;0.053)    | 0.024 [0.020]<br>(0.004;0.044)    | -0.007 [0.337]<br>(-0.020;0.007)  | 0.017 [0.020]<br>(0.003;0.032)    |
| $\overline{PTP}$          | 0.000 [0.885]<br>(-0.002;0.002)   | -0.004 [0.006]<br>(-0.006;-0.034) | -0.001 [0.711]<br>(-0.003;0.002)  | -0.006 [0.007]<br>(-0.009;-0.002) | 0.000 [0.884]<br>(-0.002;0.002)   | -0.005 [0.001]<br>(-0.008;-0.002) |
| observations              | 14,387                            | 13,749                            | 14,387                            | 13,749                            | 14,387                            | 13,749                            |

P-values in square brackets, 95%-confidence intervals in parentheses

Abbreviations:  $\overline{PTN}$ : mean-centered patient-to-nurse ratio;  $\overline{skill}$ : mean-centered skill-mix ratio; PCCL: Patient Clinical Complexity Level index

<sup>†</sup>Fixed effects for the 24 unit types, months, bed categories and between-unit effects for PTN and skill mix included but not shown.

<sup>††</sup> subgroup small comprises hospitals with less than 500 bed; subgroup large comprises hospitals with 500 beds and more

**Nurse staffing and patient-perceived quality of nursing care**

**Appendix 7: Regression results subgroup analysis medical vs. surgical patients**

| effect <sup>†</sup>       | (1) general nursing care           |                                    | (2) guidance                       |                                    | (3) loyalty                        |                                    |
|---------------------------|------------------------------------|------------------------------------|------------------------------------|------------------------------------|------------------------------------|------------------------------------|
|                           | medical                            | surgical                           | medical                            | surgical                           | medical                            | surgical                           |
| $\overline{PTN}$          | -0.014 [0.216]<br>(-0.037;0.008)   | -0.012 [0.159]<br>(-0.029;-0.005)  | -0.042 [0.015]<br>(-0.075;-0.008)  | -0.008 [0.510]<br>(-0.032;-0.016)  | -0.058 [<0.001]<br>(-0.081;-0.034) | -0.005 [0.594]<br>(-0.022;-0.013)  |
| $\overline{PTN}^2$        | 0.001 [0.245]<br>(-0.001;0.002)    | 0.000 [0.412]<br>(-0.001;0.002)    | 0.003 [0.003]<br>(0.001;0.005)     | 0.000 [0.965]<br>(-0.002;0.002)    | 0.004 [<0.001]<br>(0.002;0.005)    | 0.000 [0.831]<br>(-0.001;0.001)    |
| $\overline{skill}$        | -0.001 [0.369]<br>(-0.003;0.001)   | -0.003 [0.006]<br>(-0.005;-0.001)  | -0.004 [0.039]<br>(-0.007;0.000)   | -0.005 [0.001]<br>(-0.008;-0.002)  | -0.003 [0.025]<br>(-0.005;0.000)   | -0.003 [0.002]<br>(-0.006;-0.001)  |
| PCCL                      | -0.022 [<0.001]<br>(-0.035;-0.010) | -0.060 [<0.001]<br>(-0.072;-0.047) | -0.021 [0.035]<br>(0.004;-0.022)   | -0.051 [<0.001]<br>(-0.069;-0.033) | -0.019 [0.006]<br>(-0.033;-0.006)  | -0.040 [<0.001]<br>(-0.053;-0.027) |
| age                       | 0.013 [<0.001]<br>(0.008;0.018)    | 0.023 [<0.001]<br>(0.018;0.028)    | 0.013 [0.003]<br>(0.004;0.022)     | 0.021 [<0.001]<br>(0.014;0.028)    | 0.016 [<0.001]<br>(0.010;0.022)    | 0.021 [<0.001]<br>(0.016;0.026)    |
| age <sup>2</sup>          | 0.000 [0.002]<br>(0.000;0.000)     | 0.000 [<0.001]<br>(0.000;0.000)    | 0.000 [0.085]<br>(0.000;0.000)     | 0.000 [<0.001]<br>(0.000;0.000)    | 0.000 [<0.001]<br>(0.000;0.000)    | 0.000 [<0.001]<br>(0.000;0.000)    |
| gender<br>(= 1 if female) | -0.166 [<0.001]<br>(-0.195;-0.138) | -0.183 [<0.001]<br>(-0.208;-0.159) | -0.294 [<0.001]<br>(-0.338;-0.250) | -0.255 [<0.001]<br>(-0.291;-0.219) | -0.165 [<0.001]<br>(-0.195;-0.134) | -0.122 [<0.001]<br>(-0.141;-0.097) |
| rurality                  | 0.017 [0.020]<br>(0.003;0.032)     | 0.017 [0.015]<br>(0.003;0.030)     | 0.018 [0.118]<br>(-0.005;0.041)    | 0.038 [<0.001]<br>(0.019;0.057)    | 0.001 [0.886]<br>(-0.017;0.015)    | 0.007 [0.293]<br>(-0.006;-0.021)   |
| $\overline{PTP}$          | -0.005 [0.020]<br>(-0.008;-0.002)  | 0.001 [0.490]<br>(-0.002;0.004)    | -0.004 [0.024]<br>(-0.008;-0.001)  | 0.000 [0.819]<br>(-0.004;0.005)    | -0.004 [0.005]<br>(-0.006;-0.001)  | 0.000 [0.764]<br>(-0.003;0.003)    |
| <b>observations</b>       | <b>11,868</b>                      | <b>13,769</b>                      | <b>11,868</b>                      | <b>13,769</b>                      | <b>11,868</b>                      | <b>13,769</b>                      |

P-values in square brackets, 95%-confidence intervals in parentheses

Abbreviations:  $\overline{PTN}$ : mean-centered patient-to-nurse ratio;  $\overline{skill}$ : mean-centered skill-mix ratio; PCCL: Patient Clinical Complexity Level index

†Fixed effects for the 24 unit types, months, bed categories and between-unit effects for PTN and skill mix included but not shown.

1  
2  
3  
4  
5  
6  
7  
8  
9  
10  
11  
12  
13  
14  
15  
16  
17  
18  
19  
20  
21  
22  
23  
24  
25  
26  
27  
28  
29  
30  
31  
32  
33  
34  
35  
36  
37  
38  
39  
40  
41  
42  
43  
44  
45  
46  
47  
48  
49  
50  
51  
52  
53  
54  
55  
56  
57  
58  
59  
60STROBE Statement—Checklist of items that should be included in reports of *cross-sectional studies*

|                              | Item No | Recommendation                                                                                                                                                                                    | page                 |
|------------------------------|---------|---------------------------------------------------------------------------------------------------------------------------------------------------------------------------------------------------|----------------------|
| <b>Title and abstract</b>    | 1       | (a) Indicate the study's design with a commonly used term in the title or the abstract                                                                                                            | p. 1                 |
|                              |         | (b) Provide in the abstract an informative and balanced summary of what was done and what was found                                                                                               | p. 2                 |
| <b>Introduction</b>          |         |                                                                                                                                                                                                   |                      |
| Background/rationale         | 2       | Explain the scientific background and rationale for the investigation being reported                                                                                                              | p. 4                 |
| Objectives                   | 3       | State specific objectives, including any prespecified hypotheses                                                                                                                                  | p. 5                 |
| <b>Methods</b>               |         |                                                                                                                                                                                                   |                      |
| Study design                 | 4       | Present key elements of study design early in the paper                                                                                                                                           | p. 5 ff.             |
| Setting                      | 5       | Describe the setting, locations, and relevant dates, including periods of recruitment, exposure, follow-up, and data collection                                                                   | p. 6                 |
| Participants                 | 6       | (a) Give the eligibility criteria, and the sources and methods of selection of participants                                                                                                       | p. 6                 |
| Variables                    | 7       | Clearly define all outcomes, exposures, predictors, potential confounders, and effect modifiers. Give diagnostic criteria, if applicable                                                          | p. 6 ff.             |
| Data sources/<br>measurement | 8*      | For each variable of interest, give sources of data and details of methods of assessment (measurement). Describe comparability of assessment methods if there is more than one group              | p. 6 ff.             |
| Bias                         | 9       | Describe any efforts to address potential sources of bias                                                                                                                                         | p. 8 f.              |
| Study size                   | 10      | Explain how the study size was arrived at                                                                                                                                                         | p. 6                 |
| Quantitative variables       | 11      | Explain how quantitative variables were handled in the analyses. If applicable, describe which groupings were chosen and why                                                                      | p. 6 ff.             |
| Statistical methods          | 12      | (a) Describe all statistical methods, including those used to control for confounding                                                                                                             | p. 8 f.              |
|                              |         | (b) Describe any methods used to examine subgroups and interactions                                                                                                                               | p. 8 f.              |
|                              |         | (c) Explain how missing data were addressed                                                                                                                                                       | p. 9                 |
|                              |         | (d) If applicable, describe analytical methods taking account of sampling strategy                                                                                                                | n.a.                 |
|                              |         | (e) Describe any sensitivity analyses                                                                                                                                                             | p. 8 f.              |
| <b>Results</b>               |         |                                                                                                                                                                                                   |                      |
| Participants                 | 13*     | (a) Report numbers of individuals at each stage of study—eg numbers potentially eligible, examined for eligibility, confirmed eligible, included in the study, completing follow-up, and analysed | p. 6                 |
|                              |         | (b) Give reasons for non-participation at each stage                                                                                                                                              | n.a.                 |
|                              |         | (c) Consider use of a flow diagram                                                                                                                                                                | n.a.                 |
| Descriptive data             | 14*     | (a) Give characteristics of study participants (eg demographic, clinical, social) and information on exposures and potential confounders                                                          | p. 9,<br>table A.1   |
|                              |         | (b) Indicate number of participants with missing data for each variable of interest                                                                                                               | n.a.                 |
| Outcome data                 | 15*     | Report numbers of outcome events or summary measures                                                                                                                                              | p. 9,<br>table 2     |
| Main results                 | 16      | (a) Give unadjusted estimates and, if applicable, confounder-adjusted estimates and their precision (eg, 95% confidence interval). Make clear                                                     | p. 10 f.,<br>table 3 |

|                          |    |                                                                                                                                                                            |                                              |
|--------------------------|----|----------------------------------------------------------------------------------------------------------------------------------------------------------------------------|----------------------------------------------|
|                          |    | which confounders were adjusted for and why they were included                                                                                                             |                                              |
|                          |    | (b) Report category boundaries when continuous variables were categorized                                                                                                  | p. 8 f.                                      |
|                          |    | (c) If relevant, consider translating estimates of relative risk into absolute risk for a meaningful time period                                                           | n.a.                                         |
| Other analyses           | 17 | Report other analyses done—eg analyses of subgroups and interactions, and sensitivity analyses                                                                             | p. 10 f.,<br>tables<br>A.2, A.3,<br>A.4, A.5 |
| <b>Discussion</b>        |    |                                                                                                                                                                            |                                              |
| Key results              | 18 | Summarise key results with reference to study objectives                                                                                                                   | p. 11 f.                                     |
| Limitations              | 19 | Discuss limitations of the study, taking into account sources of potential bias or imprecision. Discuss both direction and magnitude of any potential bias                 | p. 14                                        |
| Interpretation           | 20 | Give a cautious overall interpretation of results considering objectives, limitations, multiplicity of analyses, results from similar studies, and other relevant evidence | p. 11 ff.                                    |
| Generalisability         | 21 | Discuss the generalisability (external validity) of the study results                                                                                                      | p. 11 ff.                                    |
| <b>Other information</b> |    |                                                                                                                                                                            |                                              |
| Funding                  | 22 | Give the source of funding and the role of the funders for the present study and, if applicable, for the original study on which the present article is based              | p. 18                                        |

\*Give information separately for exposed and unexposed groups.

**Note:** An Explanation and Elaboration article discusses each checklist item and gives methodological background and published examples of transparent reporting. The STROBE checklist is best used in conjunction with this article (freely available on the Web sites of PLoS Medicine at <http://www.plosmedicine.org/>, Annals of Internal Medicine at <http://www.annals.org/>, and Epidemiology at <http://www.epidem.com/>). Information on the STROBE Initiative is available at [www.strobe-statement.org](http://www.strobe-statement.org).
