# Supplementary material for: Nurse staffing and patient-perceived quality of nursing care: a cross-sectional analysis of survey and administrative data in German hospitals
Source: PubMed Central journal article supplement — BMJ Open. 2021 Nov 9;11(11):e051133. doi: 10.1136/bmjopen-2021-051133 (PMC8578983; doi:10.1136/bmjopen-2021-051133), 2021-11-09
Supplement: bmjopen-2021-051133supp001.pdf [file bmjopen-2021-051133supp001.pdf]

## Appendix: Nurse staffing and patient-perceived quality of nursing care: A cross-sectional analysis of survey and administrative data in German hospitals

### Appendix 1: Mean PTN ratio and skill mix ratio per unit type

| unit type          | patients      | patient-to nurse ratio (mean) | skill mix ratio (mean) |
|--------------------|---------------|-------------------------------|------------------------|
| internal medicine  | 6,260         | 5.92                          | 7.54                   |
| geriatrics         | 106           | 8.75                          | 11.91                  |
| cardiology         | 1,698         | 4.68                          | 5.85                   |
| nephrology         | 61            | 4.78                          | 4.70                   |
| hematology         | 181           | 5.31                          | 5.56                   |
| endocrinology      | 22            | 8.41                          | 13.59                  |
| gastroenterology   | 378           | 6.20                          | 8.30                   |
| pneumology         | 200           | 4.91                          | 7.68                   |
| rheumatology       | 121           | 9.75                          | 9.71                   |
| pulmonary medicine | 77            | 6.16                          | 6.14                   |
| general surgery    | 7,512         | 5.87                          | 6.59                   |
| trauma surgery     | 1,784         | 6.50                          | 7.14                   |
| neurosurgery       | 582           | 5.90                          | 5.64                   |
| vascular surgery   | 300           | 5.76                          | 4.98                   |
| plastic surgery    | 186           | 5.01                          | 4.30                   |
| thoracic surgery   | 81            | 5.25                          | 6.44                   |
| heart surgery      | 319           | 3.77                          | 5.08                   |
| urology            | 2,396         | 6.27                          | 5.45                   |
| orthopedics        | 2,753         | 6.05                          | 6.94                   |
| neurology          | 1,951         | 5.36                          | 6.26                   |
| nuclear medicine   | 103           | 4.26                          | 3.33                   |
| radiotherapy       | 53            | 5.32                          | 5.27                   |
| dermatology        | 760           | 5.93                          | 4.87                   |
| dentistry          | 252           | 4.85                          | 4.41                   |
| <b>total</b>       | <b>28,136</b> | <b>5.84</b>                   | <b>6.61</b>            |

### Appendix 2 Illustration: Effect of an additional patient per nurse on QoNC factor 1 (ceteris paribus)

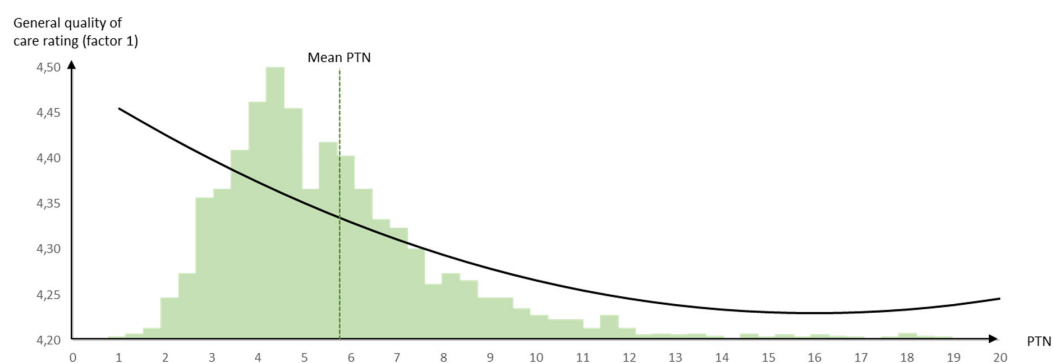

**Note:** the green area illustrates the distribution (histogram) of the PTN ratio and indicates the quantity of data points to substantiate the estimation depending on the PTN ratio.

## Nurse staffing and patient-perceived quality of nursing care

## Appendix 3: Regression results generalized random intercept model (odds ratios)

| effect <sup>†</sup>              | (1) general nursing care        | (2) guidance                    | (3) loyalty                     |
|----------------------------------|---------------------------------|---------------------------------|---------------------------------|
| $\overline{PTN}$                 | 0.951 [0.010]<br>(0.915;0.988)  | 0.943 [0.010]<br>(0.902;0.986)  | 0.929 [<0.001]<br>(0.897;0.963) |
| $\overline{PTN}^2$               | 1.003 [0.035]<br>(1.000;1.005)  | 1.003 [0.035]<br>(1.001;1.006)  | 1.004 [0.001]<br>(1.002;1.006)  |
| $\overline{skill}$               | 0.995 [0.050]<br>(0.991;1.000)  | 0.997 [0.050]<br>(0.991;1.002)  | 0.991 [<0.001]<br>(0.986;0.995) |
| <i>PCCL</i>                      | 0.876 [<0.001]<br>(0.851;0.900) | 0.875 [<0.001]<br>(0.846;0.906) | 0.944 [<0.001]<br>(0.922;0.967) |
| <i>age</i>                       | 1.080 [<0.001]<br>(1.066;1.094) | 1.061 [<0.001]<br>(1.045;1.077) | 1.034 [<0.001]<br>(1.024;1.045) |
| <i>age</i> <sup>2</sup>          | 0.999 [<0.001]<br>(0.999;1.000) | 1.000 [<0.001]<br>(0.999;1.000) | 1.000 [<0.001]<br>(1.000;1.000) |
| <i>gender</i><br>(= 1 if female) | 0.903 [<0.001]<br>(0.854;0.955) | 0.934 [<0.001]<br>(0.874;0.999) | 0.822 [<0.001]<br>(0.781;0.865) |
| <i>rurality</i>                  | 1.060 [<0.001]<br>(1.029;1.091) | 1.025 [<0.001]<br>(0.991;1.062) | 1.010 [0.463]<br>(0.984;1.037)  |
| $\overline{PTP}$                 | 0.997 [0.278]<br>(0.992;1.002)  | 0.998 [0.278]<br>(0.992;1.004)  | 0.997 [0.140]<br>(0.993;1.001)  |
| <b>observations</b>              | <b>28,136</b>                   | <b>28,136</b>                   | <b>28,136</b>                   |

P-values in square brackets, 95%-confidence intervals in parentheses

Abbreviations:  $\overline{PTN}$ : mean-centered patient-to-nurse ratio;  $\overline{skill}$ : mean-centered skill-mix ratio; *PCCL*: Patient Clinical Complexity Level index

<sup>†</sup>Fixed effects for the 24 unit types, months, bed categories and between-unit effects for PTN and skill mix included but not shown.

## Appendix 4: Regression results random effects model

| effect <sup>†</sup>              | (1) general nursing care           | (2) guidance                       | (3) loyalty                        |
|----------------------------------|------------------------------------|------------------------------------|------------------------------------|
| $\overline{PTN}$                 | -0.006 [0.009]<br>(-0.011;-0.002)  | -0.007 [0.045]<br>(-0.014;0.000)   | -0.010 [<0.001]<br>(-0.015;-0.005) |
| $\overline{PTN}^2$               | 0.001 [0.003]<br>(0.000;0.002)     | 0.001 [0.037]<br>(0.000;0.002)     | 0.001 [0.003]<br>(0.000;0.002)     |
| $\overline{skill}$               | -0.003 [<0.001]<br>(-0.004;-0.001) | -0.005 [<0.001]<br>(-0.007;-0.003) | -0.003 [<0.001]<br>(-0.005;-0.002) |
| <i>PCCL</i>                      | -0.048 [<0.001]<br>(-0.057;-0.039) | -0.034 [<0.001]<br>(-0.047;-0.022) | -0.027 [<0.001]<br>(-0.036;-0.018) |
| <i>age</i>                       | 0.022 [<0.001]<br>(0.018;0.025)    | 0.018 [<0.001]<br>(0.013;0.023)    | 0.018 [<0.001]<br>(0.014;0.022)    |
| <i>age</i> <sup>2</sup>          | 0.000 [<0.001]<br>(0.000;0.000)    | 0.000 [<0.001]<br>(0.000;0.000)    | 0.000 [<0.001]<br>(0.000;0.000)    |
| <i>gender</i><br>(= 1 if female) | -0.192 [<0.001]<br>(-0.210;-0.174) | -0.276 [<0.001]<br>(-0.303;-0.249) | -0.140 [<0.001]<br>(-0.159;-0.121) |
| <i>rurality</i>                  | 0.014 [0.004]<br>(0.004;0.024)     | 0.028 [<0.001]<br>(0.014;0.042)    | 0.004 [0.373]<br>(-0.005;0.014)    |
| $\overline{PTP}$                 | -0.002 [0.030]<br>(-0.003;0.000)   | -0.003 [0.026]<br>(-0.005;0.000)   | -0.002 [0.013]<br>(-0.003;0.000)   |
| <b>observations</b>              | <b>28,136</b>                      | <b>28,136</b>                      | <b>28,136</b>                      |

P-values in square brackets, 95%-confidence intervals in parentheses

Abbreviations:  $\overline{PTN}$ : mean-centered patient-to-nurse ratio;  $\overline{skill}$ : mean-centered skill-mix ratio; *PCCL*: Patient Clinical Complexity Level index

<sup>†</sup>Fixed effects for the 24 unit types, months, bed categories and between-unit effects for PTN and skill mix included but not shown.

## Nurse staffing and patient-perceived quality of nursing care

## Appendix 5: Regression results subgroup analysis case severity

| effect <sup>†</sup>       | (1) general nursing care           |                                    | (2) guidance                       |                                    | (3) loyalty                        |                                    |
|---------------------------|------------------------------------|------------------------------------|------------------------------------|------------------------------------|------------------------------------|------------------------------------|
|                           | low (PCCL=0)                       | high (PCCL>0) <sup>††</sup>        | low (PCCL=0)                       | high (PCCL>0) <sup>††</sup>        | low (PCCL=0)                       | high (PCCL>0) <sup>††</sup>        |
| $\overline{PTN}$          | -0.019 [0.009]<br>(-0.033;-0.005)  | -0.022 [0.121]<br>(-0.051;-0.003)  | -0.021 [0.051]<br>(-0.043;0.000)   | -0.024 [0.245]<br>(-0.063;0.016)   | -0.025 [0.001]<br>(-0.040;-0.010)  | -0.022 [0.142]<br>(-0.050;-0.007)  |
| $\overline{PTN}^2$        | 0.001 [0.009]<br>(0.000;0.002)     | 0.001 [0.222]<br>(-0.001;0.003)    | 0.001 [0.066]<br>(0.0000;0.003)    | 0.001 [0.312]<br>(-0.001;0.004)    | 0.001 [0.004]<br>(0.000;0.002)     | 0.001 [0.375]<br>(-0.001;0.003)    |
| $\overline{skill}$        | -0.003 [0.001]<br>(-0.005;-0.001)  | -0.003 [0.070]<br>(-0.006;0.000)   | -0.005 [<0.001]<br>(-0.008;-0.003) | -0.004 [0.079]<br>(-0.008;0.000)   | -0.004 [<0.001]<br>(-0.005;-0.002) | -0.003 [0.059]<br>(-0.006;0.000)   |
| PCCL                      | —<br>—                             | -0.038 [<0.001]<br>(-0.055;-0.021) | —<br>—                             | -0.008 [0.505]<br>(-0.032;0.016)   | —<br>—                             | -0.021 [0.017]<br>(-0.038;-0.004)  |
| age                       | 0.018 [<0.001]<br>(0.014;0.022)    | 0.030 [<0.001]<br>(0.022;0.038)    | 0.015 [<0.001]<br>(0.009;0.021)    | 0.022 [<0.001]<br>(0.011;0.033)    | 0.015 [<0.001]<br>(0.011;0.019)    | 0.022 [<0.001]<br>(0.014;0.030)    |
| age <sup>2</sup>          | 0.000 [<0.001]<br>(0.000;0.000)    | 0.000 [<0.001]<br>(0.000;0.000)    | 0.000 [0.024]<br>(0.000;0.000)     | 0.000 [0.001]<br>(0.000;0.000)     | 0.000 [<0.001]<br>(0.000;0.000)    | 0.000 [<0.001]<br>(0.000;0.000)    |
| gender<br>(= 1 if female) | -0.190 [<0.001]<br>(-0.211;-0.169) | -0.193 [0.004]<br>(-0.231;-0.154)  | -0.283 [<0.001]<br>(-0.315;-0.252) | -0.252 [<0.001]<br>(-0.306;-0.198) | -0.142 [<0.001]<br>(-0.164;-0.120) | -0.128 [<0.001]<br>(-0.167;-0.089) |
| rurality                  | 0.009 [0.125]<br>(-0.002;0.020)    | 0.029 [0.004]<br>(0.009;0.048)     | 0.021 [0.015]<br>(0.004;0.037)     | 0.050 [<0.001]<br>(0.023;0.077)    | -0.001 [0.848]<br>(-0.013;0.010)   | 0.020 [0.050]<br>(0.000;0.039)     |
| $\overline{PTP}$          | -0.001 [0.175]<br>(-0.003;0.001)   | -0.003 [0.073]<br>(-0.006;0.000)   | -0.002 [0.226]<br>(-0.004;0.001)   | -0.005 [0.027]<br>(-0.010;-0.001)  | -0.001 [0.120]<br>(-0.003;0.000)   | -0.003 [0.039]<br>(-0.007;0.000)   |
| observations              | 20,624                             | 7,512                              | 20,624                             | 7,512                              | 20,624                             | 7,512                              |

P-values in square brackets, 95%-confidence intervals in parentheses

Abbreviations:  $\overline{PTN}$ : mean-centered patient-to-nurse ratio;  $\overline{skill}$ : mean-centered skill-mix ratio; PCCL: Patient Clinical Complexity Level index

<sup>†</sup>Fixed effects for the 24 unit types, months, bed categories and between-unit effects for PTN and skill mix included but not shown.

<sup>††</sup> Subgroup "high" comprises patients with a PCCL from 1 to 6.

Appendix 6: Regression results subgroup analysis hospital size<sup>††</sup>

| effect <sup>†</sup>       | (1) general nursing care           |                                    | (2) guidance                       |                                    | (3) loyalty                        |                                    |
|---------------------------|------------------------------------|------------------------------------|------------------------------------|------------------------------------|------------------------------------|------------------------------------|
|                           | small                              | large                              | small                              | large                              | small                              | large                              |
| $\overline{PTN}$          | -0.018 [0.024]<br>(-0.034;-0.002)  | -0.015 [0.186]<br>(-0.037;0.007)   | -0.009 [0.447]<br>(-0.033;-0.015)  | -0.031 [0.058]<br>(-0.063;0.001)   | -0.024 [0.005]<br>(-0.040;-0.007)  | -0.014 [0.216]<br>(-0.037;0.008)   |
| $\overline{PTN}^2$        | 0.001 [0.048]<br>(0.000;0.002)     | 0.001 [0.155]<br>(0.000;0.002)     | 0.000 [0.660]<br>(-0.001;0.002)    | 0.002 [0.041]<br>(0.000;0.004)     | 0.001 [0.035]<br>(0.000;0.002)     | 0.001 [0.245]<br>(-0.001;0.002)    |
| $\overline{skill}$        | -0.004 [<0.001]<br>(-0.006;-0.002) | -0.002 [0.183]<br>(-0.004;0.001)   | -0.005 [0.002]<br>(-0.008;-0.002)  | -0.004 [0.009]<br>(-0.008;-0.001)  | -0.005 [<0.001]<br>(-0.007;-0.003) | -0.001 [0.369]<br>(-0.003;0.001)   |
| PCCL                      | -0.050 [<0.001]<br>(-0.062;-0.037) | -0.046 [<0.001]<br>(-0.058;-0.035) | -0.043 [<0.001]<br>(-0.062;-0.024) | -0.028 [0.002]<br>(-0.045;-0.011)  | -0.034 [<0.001]<br>(-0.047;-0.021) | -0.022 [<0.001]<br>(-0.035;-0.010) |
| age                       | 0.026 [<0.001]<br>(0.021;0.030)    | 0.017 [<0.001]<br>(0.012;0.022)    | 0.023 [<0.001]<br>(0.016;0.030)    | 0.012 [0.002]<br>(0.004;0.019)     | 0.022 [<0.001]<br>(0.017;0.027)    | 0.013 [<0.001]<br>(0.008;0.018)    |
| age <sup>2</sup>          | 0.000 [<0.001]<br>(0.000;0.000)    | 0.000 [<0.001]<br>(0.000;0.000)    | 0.000 [<0.001]<br>(0.000;0.000)    | 0.000 [0.097]<br>(0.000;0.000)     | 0.000 [<0.001]<br>(0.000;0.000)    | 0.000 [0.002]<br>(0.000;0.000)     |
| gender<br>(= 1 if female) | -0.165 [<0.001]<br>(-0.189;-0.140) | -0.223 [<0.001]<br>(-0.251;-0.195) | -0.245 [<0.001]<br>(-0.282;-0.208) | -0.311 [<0.001]<br>(-0.351;-0.271) | -0.116 [<0.001]<br>(-0.141;-0.090) | -0.166 [<0.001]<br>(-0.195;-0.138) |
| rurality                  | 0.010 [0.148]<br>(0.003;0.023)     | 0.020 [0.006]<br>(0.006;0.034)     | 0.033 [0.001]<br>(0.013;0.053)     | 0.024 [0.020]<br>(0.004;0.044)     | -0.007 [0.337]<br>(-0.020;0.007)   | 0.017 [0.020]<br>(0.003;0.032)     |
| $\overline{PTP}$          | 0.000 [0.885]<br>(-0.002;0.002)    | -0.004 [0.006]<br>(-0.006;-0.034)  | -0.001 [0.711]<br>(-0.003;0.002)   | -0.006 [0.007]<br>(-0.009;-0.002)  | 0.000 [0.884]<br>(-0.002;0.002)    | -0.005 [<0.001]<br>(-0.008;-0.002) |
| observations              | 14,387                             | 13,749                             | 14,387                             | 13,749                             | 14,387                             | 13,749                             |

P-values in square brackets, 95%-confidence intervals in parentheses

Abbreviations:  $\overline{PTN}$ : mean-centered patient-to-nurse ratio;  $\overline{skill}$ : mean-centered skill-mix ratio; PCCL: Patient Clinical Complexity Level index

<sup>†</sup>Fixed effects for the 24 unit types, months, bed categories and between-unit effects for PTN and skill mix included but not shown.

<sup>††</sup> subgroup small comprises hospitals with less than 500 bed; subgroup large comprises hospitals with 500 beds and more

## Nurse staffing and patient-perceived quality of nursing care

## Appendix 7: Regression results subgroup analysis medical vs. surgical patients

| effect <sup>†</sup>       | (1) general nursing care           |                                    | (2) guidance                       |                                    | (3) loyalty                        |                                    |
|---------------------------|------------------------------------|------------------------------------|------------------------------------|------------------------------------|------------------------------------|------------------------------------|
|                           | medical                            | surgical                           | medical                            | surgical                           | medical                            | surgical                           |
| $\overline{PTN}$          | -0.014 [0.216]<br>(-0.037;0.008)   | -0.012 [0.159]<br>(-0.029;-0.005)  | -0.042 [0.015]<br>(-0.075;-0.008)  | -0.008 [0.510]<br>(-0.032;-0.016)  | -0.058 [<0.001]<br>(-0.081;-0.034) | -0.005 [0.594]<br>(-0.022;-0.013)  |
| $\overline{PTN}^2$        | 0.001 [0.245]<br>(-0.001;0.002)    | 0.000 [0.412]<br>(-0.001;0.002)    | 0.003 [0.003]<br>(0.001;0.005)     | 0.000 [0.965]<br>(-0.002;0.002)    | 0.004 [<0.001]<br>(0.002;0.005)    | 0.000 [0.831]<br>(-0.001;0.001)    |
| $\overline{skill}$        | -0.001 [0.369]<br>(-0.003;0.001)   | -0.003 [0.006]<br>(-0.005;-0.001)  | -0.004 [0.039]<br>(-0.007;0.000)   | -0.005 [0.001]<br>(-0.008;-0.002)  | -0.003 [0.025]<br>(-0.005;0.000)   | -0.003 [0.002]<br>(-0.006;-0.001)  |
| PCCL                      | -0.022 [<0.001]<br>(-0.035;-0.010) | -0.060 [<0.001]<br>(-0.072;-0.047) | -0.021 [0.035]<br>(0.004;-0.022)   | -0.051 [<0.001]<br>(-0.069;-0.033) | -0.019 [0.006]<br>(-0.033;-0.006)  | -0.040 [<0.001]<br>(-0.053;-0.027) |
| age                       | 0.013 [<0.001]<br>(0.008;0.018)    | 0.023 [<0.001]<br>(0.018;0.028)    | 0.013 [0.003]<br>(0.004;0.022)     | 0.021 [<0.001]<br>(0.014;0.028)    | 0.016 [<0.001]<br>(0.010;0.022)    | 0.021 [<0.001]<br>(0.016;0.026)    |
| age <sup>2</sup>          | 0.000 [0.002]<br>(0.000;0.000)     | 0.000 [<0.001]<br>(0.000;0.000)    | 0.000 [0.085]<br>(0.000;0.000)     | 0.000 [<0.001]<br>(0.000;0.000)    | 0.000 [<0.001]<br>(0.000;0.000)    | 0.000 [<0.001]<br>(0.000;0.000)    |
| gender<br>(= 1 if female) | -0.166 [<0.001]<br>(-0.195;-0.138) | -0.183 [<0.001]<br>(-0.208;-0.159) | -0.294 [<0.001]<br>(-0.338;-0.250) | -0.255 [<0.001]<br>(-0.291;-0.219) | -0.165 [<0.001]<br>(-0.195;-0.134) | -0.122 [<0.001]<br>(-0.141;-0.097) |
| rurality                  | 0.017 [0.020]<br>(0.003;0.032)     | 0.017 [0.015]<br>(0.003;0.030)     | 0.018 [0.118]<br>(-0.005;0.041)    | 0.038 [<0.001]<br>(0.019;0.057)    | 0.001 [0.886]<br>(-0.017;0.015)    | 0.007 [0.293]<br>(-0.006;-0.021)   |
| $\overline{PTP}$          | -0.005 [0.020]<br>(-0.008;-0.002)  | 0.001 [0.490]<br>(-0.002;0.004)    | -0.004 [0.024]<br>(-0.008;-0.001)  | 0.000 [0.819]<br>(-0.004;0.005)    | -0.004 [0.005]<br>(-0.006;-0.001)  | 0.000 [0.764]<br>(-0.003;0.003)    |
| observations              | 11,868                             | 13,769                             | 11,868                             | 13,769                             | 11,868                             | 13,769                             |

P-values in square brackets, 95%-confidence intervals in parentheses

Abbreviations:  $\overline{PTN}$ : mean-centered patient-to-nurse ratio;  $\overline{skill}$ : mean-centered skill-mix ratio; PCCL: Patient Clinical Complexity Level index

<sup>†</sup>Fixed effects for the 24 unit types, months, bed categories and between-unit effects for PTN and skill mix included but not shown.
